# Supplementary material for: Three-in-One Simultaneous Extraction of Proteins, Metabolites and Lipids for Multi-Omics
Source: Front Genet. 2021 Apr 15;12:635971. doi: 10.3389/fgene.2021.635971 (PMC8082496; doi:10.3389/fgene.2021.635971)
Supplement: Supplementary Table 2 — Comparison of the identified lipid classes and relative abundances with other published papers. [file Table_2.XLSX]

## Sheet: total relative abundance
Supplemental Table 2. Comparison of the identified lipid classes and relative abundances with other published papers
	Our study (Background: WS)		Higashi et al., Sci. Rep. 2015 (Background:Col-0)		Kehelpannala et al., Plant Met. 2020 (Background:Col-0)		Coman et al., Mol. Cell. Proteomics 2016a (Background:cell base)		Salem et al., Plant Met. 2016 (Background:Col-0)		Salem et al., JoVE 2017 (Background:Col-0)		Nakayasu et al., mSystems 2016 (Background:MERS-CoV)
Class	Total numbers in class	Total levels	Total numbers in class	Total levels	Total numbers in class	Total levels	Total numbers in class	Total levels	Total numbers in class	Total levels	Total numbers in class	Total levels	Total numbers in class	Total levels
TG	160	6.7621e+09	12	Not found in paper	51	2.02259e+08	58	Not found in paper	58	1.48292e+07	58	Not found in paper	8	Not found in paper
MGDG	26	3.33467e+09	9	Not found in paper	15	1.46852e+09	21	Not found in paper	21	1.90094e+07	19	Not found in paper	0	Not found in paper
PC	40	2.20414e+09	12	Not found in paper	23	1.4725e+09	21	Not found in paper	21	1.23434e+08	21	Not found in paper	34	Not found in paper
Cer	34	1.95226e+09	0	Not found in paper	5	7.5657e+06	8	Not found in paper	8	619731	0	Not found in paper	15	Not found in paper
PA	9	1.01979e+09	0	Not found in paper	10	2.17078e+07	0	Not found in paper	0	0	0	Not found in paper	0	Not found in paper
PE	23	8.8056e+08	8	Not found in paper	18	1.20038e+08	19	Not found in paper	19	1.5062e+07	19	Not found in paper	46	Not found in paper
DGDG	27	7.30688e+08	12	Not found in paper	22	4.92731e+08	21	Not found in paper	21	3.88565e+07	20	Not found in paper	0	Not found in paper
DG	33	6.71546e+08	8	Not found in paper	21	6.39845e+07	5	Not found in paper	5	175078	5	Not found in paper	4	Not found in paper
PG	18	4.83013e+08	5	Not found in paper	5	1.59979e+07	8	Not found in paper	8	1.15907e+07	8	Not found in paper	18	Not found in paper
SM	3	4.02444e+08	0	Not found in paper	0	0	0	Not found in paper	0	0	0	Not found in paper	3	Not found in paper
DGMG	10	2.01255e+08	0	Not found in paper	0	0	0	Not found in paper	0	0	0	Not found in paper	0	Not found in paper
PS	17	1.98915e+08	0	Not found in paper	2	2.61928e+06	14	Not found in paper	14	1.36994e+07	14	Not found in paper	5	Not found in paper
PI	11	1.50884e+08	5	Not found in paper	8	604948	1	Not found in paper	1	21890	1	Not found in paper	33	Not found in paper
SQMG	2	1.37507e+08	0	Not found in paper	0	0	0	Not found in paper	0	0	0	Not found in paper	0	Not found in paper
PIP	2	7.28375e+07	0	Not found in paper	0	0	0	Not found in paper	0	0	0	Not found in paper	0	Not found in paper
So	2	5.73506e+07	0	Not found in paper	0	0	0	Not found in paper	0	0	0	Not found in paper	0	Not found in paper
dMePE	2	5.12505e+07	0	Not found in paper	0	0	0	Not found in paper	0	0	0	Not found in paper	0	Not found in paper
LPC	1	1.38356e+07	0	Not found in paper	5	1.3331e+07	0	Not found in paper	0	0	3	Not found in paper	0	Not found in paper
Co	1	1.05523e+07	0	Not found in paper	0	0	0	Not found in paper	0	0	0	Not found in paper	0	Not found in paper
LPE	1	7.95895e+06	0	Not found in paper	3	1.13626e+06	0	Not found in paper	0	0	0	Not found in paper	0	Not found in paper
MG	1	4.5272e+06	0	Not found in paper	0	0	0	Not found in paper	0	0	0	Not found in paper	0	Not found in paper
MGMG	1	4.48325e+06	0	Not found in paper	0	0	0	Not found in paper	0	0	0	Not found in paper	0	Not found in paper
SQDG	0	0	7	Not found in paper	6	1.36589e+07	9	Not found in paper	9	1.95038e+06	9	Not found in paper	0	Not found in paper
HexCer	0	0	0	Not found in paper	12	4.50565e+07	0	Not found in paper	0	0	0	Not found in paper	1	Not found in paper

## Sheet: Higashi et al., Sci. Rep. 2015
Lipid species
TG(56:5)
TG(54:9)
TG(54:8)
TG(54:7)
TG(54:6)
TG(54:5)
TG(52:5)
TG(52:4)
TG(52:3)
TG(52:1)
TG(50:3)
TG(50:2)
SQDG(36:6)
SQDG(36:5)
SQDG(36:4)
SQDG(34:3)
SQDG(34:2)
SQDG(34:1)
SQDG(34:0)
PI(36:5)
PI(36:2)
PI(34:3)
PI(34:2)
PI(34:1)
PG(36:6)
PG(34:4)
PG(34:3)
PG(34:2)
PG(34:1)
PE(36:6)
PE(36:5)
PE(36:4)
PE(36:3)
PE(36:2)
PE(34:3)
PE(34:2)
PE(34:1)
PC(36:6)
PC(36:5)
PC(36:4)
PC(36:3)
PC(36:2)
PC(36:1)
PC(34:6)
PC(34:5)
PC(34:4)
PC(34:3)
PC(34:2)
PC(34:1)
MGDG(36:6)
MGDG(36:5)
MGDG(36:4)
MGDG(34:6)
MGDG(34:5)
MGDG(34:4)
MGDG(34:3)
MGDG(34:2)
MGDG(34:1)
DGDG(36:6)
DGDG(36:5)
DGDG(36:4)
DGDG(36:3)
DGDG(36:2)
DGDG(34:6)
DGDG(34:5)
DGDG(34:4)
DGDG(34:3)
DGDG(34:2)
DGDG(34:1)
DGDG(34:0)
DG(36:6)
DG(36:5)
DG(36:4)
DG(36:3)
DG(36:2)
DG(34:3)
DG(34:2)
DG(34:1)

## Sheet: Kehelpannala et al., Plant Met.
Lipid species	Levels
Cer(t40:1+O)	763519
Cer(t42:1+O)	3.39465e+06
Cer(t42:2+O)	2.83716e+06
Cer(t44:0+O)	13079.4
Cer(t44:1+O)	557298
Cer	7.5657e+06
DG(30:1)	98092.9
DG(32:0)	3885.93
DG(32:1)	57521
DG(32:3)	149064
DG(34:0)	935817
DG(34:1)	1.2703e+06
DG(34:2)	2.13218e+07
DG(34:3)	86846
DG(34:4)	901521
DG(34:6)	2.73151e+06
DG(36:1)	58087.8
DG(36:2)	1.22983e+06
DG(36:3)	2.56825e+06
DG(36:4)	2.68271e+06
DG(36:5)	2.28585e+07
DG(36:6)	6.61057e+06
DG(38:3)	2859.41
DG(38:4)	70183
DG(38:5)	2521.72
DG(38:6)	13696.8
DG(40:0)	96240
DG(40:3)	233647
DG(40:4)	1101.02
DG	6.39845e+07
DGDG(32:0)	1.67903e+06
DGDG(32:1)	108984
DGDG(32:2)	66955.1
DGDG(32:3)	329724
DGDG(34:0)	885226
DGDG(34:1)	11731.9
DGDG(34:2)	3.03186e+07
DGDG(34:3)	8.52536e+07
DGDG(34:4)	1.71761e+06
DGDG(34:5)	6.21543e+06
DGDG(34:6)	5.1396e+07
DGDG(36:1)	21509.1
DGDG(36:2)	360107
DGDG(36:3)	4.29804e+06
DGDG(36:4)	5.1936e+06
DGDG(36:5)	9.11536e+06
DGDG(36:6)	2.93794e+08
DGDG(36:7)	111014
DGDG(38:3)	12665.2
DGDG(38:4)	267376
DGDG(38:5)	6321.06
DGDG(38:6)	1.5686e+06
DGDG	4.92731e+08
HexCer(t18:1/22:0-OH)	3.8505e+06
HexCer(t18:1/22:1-OH)	676691
HexCer(t18:1/23:0-OH)	57519.5
HexCer(t18:1/23:1-OH)	50075.2
HexCer(t18:1/24:1-OH)	1.95337e+07
HexCer(t18:1/25:0-OH)	74580.9
HexCer(t18:1/25:1-OH)	14734.7
HexCer(t18:1/26:0-OH)	2.00373e+07
HexCer(t18:1/26:1-OH)	36054.1
HexCer(t18:1/27:0-OH)	1103.5
HexCer(t18:1/28:0-OH)	723200
HexCer(t18:1/29:1-OH)	1115.05
HexCer	4.50565e+07
LPC(16:0)	3.86512e+06
LPC(18:0)	567339
LPC(18:1)	856541
LPC(18:2)	4.35028e+06
LPC(18:3)	3.69171e+06
LPC	1.3331e+07
LPE(16:0)	483339
LPE(18:2)	352009
LPE(18:3)	300914
LPE	1.13626e+06
MGDG(32:3)	6.57015e+06
MGDG(32:5)	1.78602e+06
MGDG(34:0)	3176.84
MGDG(34:1)	5.10202e+06
MGDG(34:2)	2.04356e+07
MGDG(34:3)	2.0886e+07
MGDG(34:4)	2.36191e+07
MGDG(34:5)	1.51999e+08
MGDG(34:6)	7.83916e+08
MGDG(36:3)	1.26939e+06
MGDG(36:4)	2.7597e+06
MGDG(36:5)	8.52361e+06
MGDG(36:6)	4.40741e+08
MGDG(38:5)	480063
MGDG(38:6)	432032
MGDG	1.46852e+09
PA(34:1)	23018.5
PA(34:2)	290330
PA(34:3)	460573
PA(34:5)	1.99836e+07
PA(34:6)	222978
PA(36:2)	7051.98
PA(36:3)	47656.1
PA(36:4)	408923
PA(36:5)	81556.9
PA(36:6)	182070
PA	2.17078e+07
PC(30:1()	214.965
PC(32:1)	9.22266e+06
PC(32:2)	3.44486e+06
PC(32:3)	4.20015e+06
PC(32:4)	62038.4
PC(34:0)	70040.5
PC(34:1)	1.85629e+08
PC(34:2)	8.10963e+06
PC(34:3)	4.82669e+08
PC(34:4)	2.61778e+07
PC(34:5)	6.31001e+06
PC(34:6)	8.41272e+06
PC(36:0)	578044
PC(36:1)	9.38113e+06
PC(36:2)	6.70197e+07
PC(36:3)	1.67713e+08
PC(36:4)	9.48748e+06
PC(36:5)	1.30855e+08
PC(36:6)	3.47466e+08
PC(38:1)	1022.3
PC(38:2)	631186
PC(38:3)	4.14168e+06
PC(38:5)	917602
PC	1.4725e+09
PE(30:0)	20325.3
PE(30:1)	9086.17
PE(32:1)	13783.2
PE(32:2)	1.3409e+06
PE(32:3)	191571
PE(34:3)	4.84876e+06
PE(34:4)	2.6451e+06
PE(34:5)	19331.8
PE(36:1)	148495
PE(36:2)	3.12536e+06
PE(36:3)	4.39395e+06
PE(36:5)	8.39164e+07
PE(36:6)	1.29375e+07
PE(38:2)	1.1683e+06
PE(38:3)	231831
PE(40:3)	1.05282e+06
PE(42:3)	2.98693e+06
PE(42:4)	987711
PE	1.20038e+08
PG(34:0)	27223.7
PG(34:1)	130965
PG(34:2)	2.18781e+06
PG(34:3)	264736
PG(34:4)	1.33872e+07
PG	1.59979e+07
PI(32:0)	1517.18
PI(32:1)	5391.54
PI(32:3)	3786.82
PI(34:0)	234166
PI(34:2)	10945.7
PI(34:3)	282985
PI(36:4)	22566.3
PI(36:5)	43589.3
PI	604948
PS(34:2)	1.13931e+06
PS(34:3)	1.47997e+06
PS	2.61928e+06
SQDG(34:4)	583733
SQDG(34:5)	1.01633e+06
SQDG(36:3)	419177
SQDG(36:5)	1.18419e+06
SQDG(36:6)	1.02546e+07
SQDG(36:7)	200910
SQDG	1.36589e+07
TG(48:2)	4.00473e+06
TG(48:3)	1.06888e+06
TG(48:4)	54231.6
TG(48:5)	1927.52
TG(50:0)	1.41575e+06
TG(50:1)	3.40487e+06
TG(50:2)	4.42052e+06
TG(50:3)	3.14782e+06
TG(50:4)	505040
TG(50:5)	130467
TG(50:6)	55862.4
TG(50:7)	1033.08
TG(52:1)	1.23354e+06
TG(52:2)	4.52438e+06
TG(52:3)	5.55477e+06
TG(52:4)	7.03909e+06
TG(52:5)	6.00433e+06
TG(52:6)	5.04122e+06
TG(52:7)	1.03887e+06
TG(52:8)	334959
TG(54:1)	739187
TG(54:2)	3.02983e+06
TG(54:3)	1.01757e+07
TG(54:4)	8.78529e+06
TG(54:5)	9.69203e+06
TG(54:6)	1.2792e+07
TG(54:7)	1.53593e+07
TG(54:8)	1.30714e+07
TG(54:9)	5.29851e+06
TG(56:1)	516701
TG(56:2)	1.50736e+06
TG(56:3)	4.73487e+06
TG(56:4)	7.11459e+06
TG(56:5)	1.23523e+07
TG(56:6)	1.10069e+07
TG(56:7)	3.48931e+06
TG(56:8)	532998
TG(56:9)	135190
TG(58:1)	267480
TG(58:2)	654204
TG(58:3)	1.96968e+06
TG(58:4)	3.62371e+06
TG(58:5)	5.89444e+06
TG(58:6)	1.36558e+07
TG(58:7)	614304
TG(60:2)	243433
TG(60:3)	381615
TG(60:4)	643491
TG(60:5)	1.34824e+06
TG(60:6)	3.39799e+06
TG(60:7)	248893
TG	2.02259e+08

## Sheet: Coman et al., Mol. Cell. Proteo
Lipid Species
DG(30:0)
DG(32:0)
DG(32:1)
DG(34:0)
DG(34:1)
DG(34:2)
DG(36:1)
DG(36:2)
DG(36:4)
DG(38:5)
DG(43:6)
DG(46:1)
DG(48:1)
DG(50:1)
LPA(16:0
LPA(18:3
LPA(18:0
LPC(14:0)
LPC(15:0)
LPC(16:0)
LPC(16:1)
LPC(17:0)
LPC(18:0)
LPC(18:1)
LPC(18:2)
LPC(20:0)
LPC(20:1)
LPC(20:3)
LPC(20:4)
LPE(16:0)
LPE(16:1)
LPE(17:0)
LPE(18:0)
LPE(18:1)
LPE(20:4)
LPE(20:5)
LPE(22:5)
LPE(22:6)
PA(30:0)
PA(32:0)
PA(32:1)
PA(34:0)
PA(34:1)
PA(34:2)
PA(35:2)
PA(36:2)
PA(38:4)
PC((O/P)(32:1)
PC((O/P)(34:0)
PC((O/P)(34:1)
PC((O/P)(36:3)
PC((O/P)(38:3)
PC((O/P)(38:4)
PC(32:0)
PC(32:1)
PC(32:2)
PC(33:1)
PC(33:2)
PC(34:1)
PC(34:2)
PC(34:3)
PC(35:1)
PC(35:2)
PC(36:1)
PC(36:2)
PC(36:3)
PC(36:4)
PC(38:4)
PC(38:5)
PC(40:5)
PC(40:6)
PE((O/P)(32:2)
PE((O/P)(34:1)
PE((O/P)(34:2)
PE((O/P)(34:3)
PE((O/P)(35:2)
PE((O/P)(35:4)
PE((O/P)(36:1)
PE((O/P)(36:2)
PE((O/P)(36:3)
PE((O/P)(36:4)
PE((O/P)(36:5)
PE((O/P)(36:6)
PE((O/P)(37:4)
PE((O/P)(37:5)
PE((O/P)(37:6)
PE((O/P)(38:1)
PE((O/P)(38:2)
PE((O/P)(38:3)
PE((O/P)(38:4)
PE((O/P)(38:5)
PE((O/P)(38:7)
PE((O/P)(40:2)
PE((O/P)(40:3)
PE((O/P)(40:5)
PE(32:1)
PE(32:2)
PE(33:1)
PE(34:1)
PE(34:2)
PE(35:1)
PE(35:2)
PE(36:1)
PE(36:2)
PE(36:3)
PE(36:4)
PE(37:2)
PE(37:3)
PE(37:4)
PE(38:2)
PE(38:3)
PE(38:4)
PE(38:5)
PE(38:6)
PE(38:7)
PE(39:5)
PE(39:6)
PE(40:1)
PE(40:2)
PE(40:4)
PE(40:5)
PE(40:6)
PE(40:7)
PE(42:7)
PG(32:0)
PG(32:1)
PG(34:1)
PG(34:2)
PG(34:3)
PG(34:4)
PG(36:1)
PG(36:3)
PG(36:4)
PG(38:1)
PG(38:2)
PG(38:3)
PG(38:4)
PG(38:5)
PG(38:6)
PG(40:3)
PG(40:4)
PG(40:5)
PG(40:6)
PG(40:7)
PG(42:7)
PI(32:1)
PI(34:1)
PI(34:2)
PI(36:2)
PI(36:3)
PI(36:4)
PI(36:5)
PI(37:2)
PI(37:3)
PI(37:4)
PI(38:3)
PI(38:4)
PI(38:5)
PI(38:6)
PI(39:5)
PI(40:5)
PI(40:6)
PI(40:7)
PS(32:1)
PS(34:1)
PS(34:2)
PS(36:1)
PS(36:2)
PS(36:3)
PS(36:4)
PS(37:1)
PS(38:1)
PS(38:2)
PS(38:3)
PS(38:4)
PS(38:5)
PS(39:3)
PS(40:1)
PS(40:2)
PS(40:3)
PS(40:4)
PS(40:5)
PS(40:6)
PS(40:7)
Cer(34:1)
Cer(34:2)
Cer(42:1)
Cer(42:2)
SM(34:0)
SM(34:1)
SM(35:1)
SM(32:1
SM(33:1
SM(36:1)
SM(38:1)
SM(38:2)
SM(39:1
SM(40:1)
SM(40:2)
SM(41:1)
SM(42:1)
SM(42:2)
TAG(44:1)
TAG(46:2)
TAG(47:2)
TAG(48:1)
TAG(48:2)
TAG(48:3)
TAG(49:2)
TAG(49:3)
TAG(50:2)
TAG(50:3)
TAG(50:4)
TAG(51:2)
TAG(51:3)
TAG(52:3)
TAG(52:4)
TAG(52:5)
TAG(53:3)
TAG(53:4)
TAG(54:3)
TAG(54:4)
TAG(54:5)
TAG(54:6)
TAG(54:7)
TAG(56:2)
TAG(56:3)
TAG(56:4)
TAG(56:5)
TAG(56:6)
TAG(56:7)
TAG(56:8)
TAG(58:2)
TAG(58:3)
TAG(58:4)
TAG(58:5)
TAG(58:7)
TAG(58:8)
TAG(58:9)
TAG(60:3)
TAG(60:4)

## Sheet: Salem et al., Plant Met. 2016
Lipid species	Levels
Cer(d18:1_c16:1)	10364		Cer	10364
Cer(d18:1_c24:1)	2770.69		Cer	2770.69
Cer(t18:0_c16:1)	45257.7		Cer	45257.7
Cer(t18:0_h24:0)	49464.5		Cer	49464.5
Cer(t18:0_h24:2)	375405		Cer	375405
Cer(t18:0_h26:0)	9749.56		Cer	9749.56
Cer(t18:1_c16:1)	20250.9		Cer	20250.9
Cer(t18:1_c22:1)	17066.1		Cer	17066.1
Cer(t18:1_c24:2)	44892.8		Cer	44892.8
Cer(t18:1_c26:2)	12489.3		Cer	12489.3
Cer(t18:1_h16:0)	90412.4		Cer	90412.4
Chlorophyll a	1.29325e+06		Chlorophyll a	1.29325e+06
Chlorophyll b	584940		Chlorophyll b	584940
CoQ10	28137.1		CoQ10	28137.1
CoQ9	273335		CoQ9	273335
DG(34:2)	24996.2		DG	24996.2
DG(34:3	28463.9		DG	28463.9
DG(36:4)	19878.8		DG	19878.8
DG(36:5)	58010.5		DG	58010.5
DG(36:6)	43728.2		DG	43728.2
DGDG(32:0)	90126.8		DGDG	90126.8
DGDG(32:1)	7203.05		DGDG	7203.05
DGDG(32:2)	4536.09		DGDG	4536.09
DGDG(32:3)	59301.3		DGDG	59301.3
DGDG(34:0)	90644.5		DGDG	90644.5
DGDG(34:1)	697472		DGDG	697472
DGDG(34:2)	2.56838e+06		DGDG	2.56838e+06
DGDG(34:3)	7.66324e+06		DGDG	7.66324e+06
DGDG(34:4	220685		DGDG	220685
DGDG(34:5)	769525		DGDG	769525
DGDG(34:6)	3.88441e+06		DGDG	3.88441e+06
DGDG(34:7)	14395.4		DGDG	14395.4
DGDG(36:2)	56375.7		DGDG	56375.7
DGDG(36:3)	442402		DGDG	442402
DGDG(36:4)	704002		DGDG	704002
DGDG(36:5)	1.38154e+06		DGDG	1.38154e+06
DGDG(36:6)	1.96984e+07		DGDG	1.96984e+07
DGDG(38:3)	11667.9		DGDG	11667.9
DGDG(38:5	71805.6		DGDG	71805.6
DGDG(38:6)	381883		DGDG	381883
DGDG(OPDA_OPDA)	38504.4		DGDG	38504.4
FA(16:0	8609.01		FA	8609.01
FA(18:0)	6495.09		FA	6495.09
FA(18:1)	5967.18		FA	5967.18
FA(18:2)	4292.21		FA	4292.21
FA(22:0)	7543.93		FA	7543.93
FA(24:0)	152125		FA	152125
FA(26:0)	430486		FA	430486
FA(28:0)	76330.9		FA	76330.9
FA(30:0)	39119.7		FA	39119.7
FA(32:0)	54833.9		FA	54833.9
FA(32:1)	3347.51		FA	3347.51
FA(34:0)	43329.5		FA	43329.5
FA(34:1)	18096		FA	18096
FA(36:1)	33926.1		FA	33926.1
FA(38:1)	34846.3		FA	34846.3
FA(40:1)	6152.68		FA	6152.68
LysoPC(16:0)	4734.93		LysoPC	4734.93
LysoPC(18:2)	4042.46		LysoPC	4042.46
LysoPC(18:3)	2847.15		LysoPC	2847.15
MGDG(32:2)	7661.67		MGDG	7661.67
MGDG(32:3)	62306.3		MGDG	62306.3
MGDG(32:4)	60861.6		MGDG	60861.6
MGDG(32:5)	70052.2		MGDG	70052.2
MGDG(32:6)	71575.1		MGDG	71575.1
MGDG(34:1)	500044		MGDG	500044
MGDG(34:2)	562956		MGDG	562956
MGDG(34:3)	2.0704e+06		MGDG	2.0704e+06
MGDG(34:4)	2.87013e+06		MGDG	2.87013e+06
MGDG(34:5)	5.45383e+06		MGDG	5.45383e+06
MGDG(34:6)	1.54333e+06		MGDG	1.54333e+06
MGDG(34:7)	145960		MGDG	145960
MGDG(36:3)	87435.3		MGDG	87435.3
MGDG(36:4)	817886		MGDG	817886
MGDG(36:5)	1.99384e+06		MGDG	1.99384e+06
MGDG(36:6)	2.2445e+06		MGDG	2.2445e+06
MGDG(38:4)	26569.3		MGDG	26569.3
MGDG(38:5)	36197.9		MGDG	36197.9
MGDG(38:6)	88315.6		MGDG	88315.6
MGDG(OPDA_dnOPDA)	238454		MGDG	238454
MGDG(OPDA_OPDA)	57053.8		MGDG	57053.8
PC(32:0)	18157		PC	18157
PC(32:2)	120688		PC	120688
PC(32:3)	96199.1		PC	96199.1
PC(32:4)	255111		PC	255111
PC(32:5)	145829		PC	145829
PC(34:1)	5.25205e+06		PC	5.25205e+06
PC(34:2)	2.28082e+07		PC	2.28082e+07
PC(34:3)	2.299e+07		PC	2.299e+07
PC(34:4)	1.06619e+06		PC	1.06619e+06
PC(34:5)	2095.07		PC	2095.07
PC(36:0)	5995.96		PC	5995.96
PC(36:1)	131880		PC	131880
PC(36:2)	3.08623e+06		PC	3.08623e+06
PC(36:3)	9.309e+06		PC	9.309e+06
PC(36:4)	2.77383e+07		PC	2.77383e+07
PC(36:5)	2.89168e+07		PC	2.89168e+07
PC(36:6)	355467		PC	355467
PC(38:3)	241279		PC	241279
PC(38:4)	301760		PC	301760
PC(38:5)	424895		PC	424895
PC(38:6)	168198		PC	168198
PE(32:1)	5636.6		PE	5636.6
PE(32:2)	11787.6		PE	11787.6
PE(32:3)	10841.6		PE	10841.6
PE(34:1)	127982		PE	127982
PE(34:2)	3.24783e+06		PE	3.24783e+06
PE(34:3)	2.96974e+06		PE	2.96974e+06
PE(34:4)	16606.4		PE	16606.4
PE(34:5)	8278.08		PE	8278.08
PE(34:6)	13942.9		PE	13942.9
PE(36:2)	174116		PE	174116
PE(36:3)	552518		PE	552518
PE(36:4)	2.44121e+06		PE	2.44121e+06
PE(36:5)	3.44683e+06		PE	3.44683e+06
PE(36:6)	1.74772e+06		PE	1.74772e+06
PE(40:2)	44860.2		PE	44860.2
PE(40:3)	36663.3		PE	36663.3
PE(42:2)	46692.1		PE	46692.1
PE(42:3)	97473.7		PE	97473.7
PE(42:4)	61251.3		PE	61251.3
PG(32:0)	149886		PG	149886
PG(32:1)	123883		PG	123883
PG(34:1)	826153		PG	826153
PG(34:2)	1.50198e+06		PG	1.50198e+06
PG(34:3)	5.24974e+06		PG	5.24974e+06
PG(34:4)	3.62345e+06		PG	3.62345e+06
PG(34:6)	11852.2		PG	11852.2
PG(36:6)	103784		PG	103784
Pheophytin	1.02557e+06		Pheophytin	1.02557e+06
PI(36:4)	21890		PI	21890
PS(36:0)	26897.6		PS	26897.6
PS(36:1)	9075.2		PS	9075.2
PS(38:0)	23420.3		PS	23420.3
PS(38:1)	4.0635e+06		PS	4.0635e+06
PS(38:2)	3.89299e+06		PS	3.89299e+06
PS(38:3)	118130		PS	118130
PS(38:5)	27178.9		PS	27178.9
PS(40:1)	732548		PS	732548
PS(40:2)	12710.7		PS	12710.7
PS(40:3)	7810.96		PS	7810.96
PS(40:4)	4.60689e+06		PS	4.60689e+06
PS(40:5)	13628.4		PS	13628.4
PS(42:2)	63856.5		PS	63856.5
PS(42:4)	100766		PS	100766
SQDG(34:1)	174950		SQDG	174950
SQDG(34:2)	371024		SQDG	371024
SQDG(34:3)	17373.1		SQDG	17373.1
SQDG(34:5)	5955.87		SQDG	5955.87
SQDG(34:6)	7920.71		SQDG	7920.71
SQDG(36:3)	33964.8		SQDG	33964.8
SQDG(36:4)	184461		SQDG	184461
SQDG(36:5)	135142		SQDG	135142
SQDG(36:6)	1.01959e+06		SQDG	1.01959e+06
TG(44:0)	8887.48		TG	8887.48
TG(44:1)	7062.66		TG	7062.66
TG(46:0)	22931		TG	22931
TG(46:1)	27500		TG	27500
TG(46:2)	14883.8		TG	14883.8
TG(48:0)	30987.2		TG	30987.2
TG(48:1)	54461.3		TG	54461.3
TG(48:2)	52700.5		TG	52700.5
TG(48:3)	23207.9		TG	23207.9
TG(50:0)	15962.1		TG	15962.1
TG(50:1)	85477.9		TG	85477.9
TG(50:2)	182408		TG	182408
TG(50:3)	91447.7		TG	91447.7
TG(50:4)	28523.8		TG	28523.8
TG(50:5)	19113.3		TG	19113.3
TG(50:6)	10563		TG	10563
TG(52:0)	9074.58		TG	9074.58
TG(52:1)	69330.7		TG	69330.7
TG(52:2)	280614		TG	280614
TG(52:3)	402496		TG	402496
TG(52:4)	717808		TG	717808
TG(52:6)	406346		TG	406346
TG(52:7)	79795.2		TG	79795.2
TG(52:9)	24072.8		TG	24072.8
TG(54:0)	9916.63		TG	9916.63
TG(54:1)	42470.7		TG	42470.7
TG(54:2)	194794		TG	194794
TG(54:3)	655930		TG	655930
TG(54:4)	776789		TG	776789
TG(54:5)	873413		TG	873413
TG(54:6)	1.25627e+06		TG	1.25627e+06
TG(54:7)	1.58111e+06		TG	1.58111e+06
TG(54:8)	1.59488e+06		TG	1.59488e+06
TG(54:9)	772492		TG	772492
TG(56:0)	5721.92		TG	5721.92
TG(56:1)	13925.7		TG	13925.7
TG(56:2)	74826.8		TG	74826.8
TG(56:3)	285675		TG	285675
TG(56:4)	594819		TG	594819
TG(56:5)	1.0629e+06		TG	1.0629e+06
TG(56:6)	749086		TG	749086
TG(56:7)	296956		TG	296956
TG(56:8)	52439.2		TG	52439.2
TG(56:9)	14697.6		TG	14697.6
TG(58:0)	2413.33		TG	2413.33
TG(58:1)	6712.96		TG	6712.96
TG(58:2)	26113.1		TG	26113.1
TG(58:3)	107997		TG	107997
TG(58:4)	281914		TG	281914
TG(58:5)	290915		TG	290915
TG(58:6)	184407		TG	184407
TG(58:7)	68764.5		TG	68764.5
TG(60:2)	7160.96		TG	7160.96
TG(60:3)	24684		TG	24684
TG(60:4)	65402.2		TG	65402.2
TG(60:5)	86060.9		TG	86060.9
TG(60:6)	67848.6		TG	67848.6
TG(60:7)	34053.7		TG	34053.7

## Sheet: Nakayasu et al., mSystems 2016
Lipid species
Cer(d18:0/16:0)
Cer(d18:0/22:0)
Cer(d18:1/16:0)
Cer(d18:1/22:0)
Cer(d18:1/24:0)
Cer(d18:1/24:1)
Cer(d18:2/16:0)
PE(16:0/0:0)
PE(16:0/18:1)
PE(16:0/20:4)
PE(16:1/18:1)
PE(18:0/0:0)
PE(18:0/18:1)
PE(18:0/20:4)
PE(18:1/0:0)
PE(18:1/18:1)
PE(18:1/18:2)
PE(18:1/20:1)
PE(20:4/0:0)
PE(22:6/0:0)
PE(24:0/18:1)
PE(P-16:0/16:1)
PE(P-16:0/18:1)
PE(P-16:0/18:2)
PE(P-16:0/20:3)
PE(P-16:0/20:4)
PE(P-16:0/20:5)
PE(P-16:0/22:4)
PE(P-16:0/22:6)
PE(P-18:0/18:1)
PE(P-18:0/20:4)
PE(P-18:0/22:6)
PE(P-18:1/22:6)
PG(14:0/18:1)
PG(16:0/16:0)
PG(16:0/16:1)
PG(16:0/16:1)
PG(16:0/18:1)
PG(16:0/20:4)
PG(16:0/22:6)
PG(16:1/16:1)
PG(16:1/18:1)
PG(16:1/22:6)
PG(17:1/18:1)
PG(18:1/18:1)
PG(18:1/18:2)
PG(18:1/20:3)
PG(18:1/20:4)
PG(18:1/22:6)
PG(20:4/22:6)
PG(22:6/22:6)
PI(14:0/18:1)
PI(16:0/0:0)
PI(16:0/16:0)
PI(16:0/16:1)
PI(16:0/16:1)_CoE
PI(16:0/18:1)
PI(16:0/20:3)
PI(16:0/20:3)_CoE
PI(16:0/20:4)
PI(16:0/20:5)
PI(16:0/22:6)
PI(16:1/18:1)
PI(16:1/20:4)
PI(17:0/18:1)
PI(17:0/20:3)
PI(17:0/20:4)
PI(17:1/18:1)
PI(18:0/0:0)
PI(18:0/18:1)
PI(18:0/18:2)
PI(18:0/20:2)
PI(18:0/20:3)
PI(18:0/20:4)
PI(18:0/22:4)
PI(18:0/22:6)
PI(18:1/0:0)
PI(18:1/18:2)
PI(18:1/20:4)
PI(19:0/20:4)
PI(19:1/20:4)
PI(20:3/20:4)
PI(20:4/0:0)_A
PI(20:4/20:4)
PS(18:0/18:1)
PS(18:0/20:4)
Cer(d18:0/16:0)
Cer(d18:0/22:0)
Cer(d18:0/24:0)
Cer(d18:0/24:1)
Cer(d18:1/24:1)
Cer(d18:1/16:0)-H2O
Cer(d18:1/24:0)-H2O
Cer(d18:1/24:1)H2O
DG(16:0/18:1/0:0)
DG(18:0/18:1/0:0)
DG(18:0/20:4/0:0)
DG(18:1/0:0/18:1)
HexCer(d18:1/24:1)
PC(0:0/14:0)
PC(0:0/16:0)_B
PC(0:0/18:1)_A
PC(0:0/20:4)
PC(14:0/14:0)
PC(14:0/15:0)
PC(14:0/16:0)
PC(14:0/16:1)
PC(15:0/16:0)
PC(16:0/16:0)
PC(16:0/16:1)
PC(16:0/18:1)
PC(16:0/18:2)
PC(16:0/20:3)
PC(16:0/20:4)
PC(16:0/22:5)
PC(16:0/22:6)
PC(16:1/0:0)
PC(16:1/16:1)
PC(16:1/18:1)
PC(16:1/18:2)
PC(17:1/18:1)
PC(18:0/18:1)
PC(18:0/20:3)
PC(18:0/20:4)
PC(18:0/22:6)
PC(18:1/18:1)
PC(18:1/18:2)
PC(18:1/19:1)
PC(18:1/20:1)
PC(18:1/20:3)
PC(18:1/20:4)
PC(18:1/22:5)
PC(18:1/22:6)
PE(16:0/20:4)
PE(18:0/22:6)
PE(18:1/0:0)
PE(18:1/18:2)
PE(20:4/0:0)
PE(20:5/0:0)
PE(22:6/0:0)
PE(P-16:0/18:1)
PE(P-16:0/20:1)
PE(P-16:0/20:1)_CoE
PE(P-16:0/20:4)
PE(P-16:0/20:5)
PE(P-16:0/22:4)
PE(P-16:0/22:6)
PE(P-18:0/18:1)
PE(P-18:0/18:1)_CoE
PE(P-18:0/20:4)
PE(P-18:0/22:4)
PE(P-18:0/22:6)
PE(P-18:1/22:6)
PS(18:0/0:0)
PS(18:0/20:4)
PS(18:0/22:6)
SM(d18:1/16:0)
SM(d18:1/24:1)
SM(d18:2/16:0)
TG(16:0/16:0/18:1)
TG(16:0/17:1/18:1)
TG(16:0/18:1/18:1)
TG(16:1/16:1/16:1)
TG(16:1/16:1/18:1)
TG(16:1/18:1/18:2)
TG(18:1/18:1/20:4)
TG(18:1/18:1/22:6)

## Sheet: lipids
number	LipidMolec	Class	FA		Calc Mass	Formula	Compound ( C ) Number	BaseRt	Adduct	ratio(Ws_Prime_Ws_Mock)	pvalue(Ws_Prime_Ws_Mock)	ratio(Dir1_Mock_Ws_Mock)	pvalue(Dir1_Mock_Ws_Mock)	ratio(Dir1_Prime_Ws_Mock)	pvalue(Dir1_Prime_Ws_Mock)	ratio(Dir1_Prime_Dir1_Mock)	pvalue(Dir1_Prime_Dir1_Mock)	ratio(Dir1_Prime_WS_Prime)	p_value(Dir1_Prime_WS_Prime)	MainGrade[c]	MainGrade[s1]	MainGrade[s2]	MainGrade[s3]	Metabolika Pathways	KEGG Pathways	WS_Mock_1	WS_Mock_2	WS_Mock_3	WS_Mock_Mean	WS_Mock_SD	WS_Mock_CV(%)	WS_Prime_1	WS_Prime_2	WS_Prime_3	WS_Prime_Mean	WS_Prime_SD	WS_Prime_CV(%)	dir1_Mock_1	dir1_Mock_2	dir1_Mock_3	dir1_Mock_Mean	dir1_Mock_SD	dir1_Mock_CV(%)	dir1_Prime_1	dir1_Prime_2	dir1_Prime_3	dir1_Prime_Mean	dir1_Prime_SD	dir1_Prime_CV(%)
neg	DGMG(23:5)	DGMG	23:05:00	(23:5)	742.414	C38H62O14		27.713	+HCOO	0.259225	0.0438617	0.124441	0.0278442	0.0358097	0.0270915	0.287765	0.1556	0.138141	0.00238294	B	-	-	-			2.5099e+06	1.80934e+06	2.57093e+06	2.29672e+06	423184	18.4256	3.10337e+06	1.97635e+06	2.94568e+06	2.67513e+06	610276	22.8129	3.91172e+06	3.92708e+06	3.70337e+06	3.84739e+06	124963	3.248	1.78272e+06	2.47844e+06	3.18245e+06	2.4812e+06	699870	28.2069
neg	MGDG(20:10_30:10)	MGDG	20:10_30:10	(20:10_30:10)	942.528	C59H74O10		27.211	+HCOO	0.691307	0.641888	1.19379	0.85014	0.138408	0.268237	0.115939	0.303826	0.200212	0.00424867	-	-	B	-			6.88438e+07	1.08384e+06	1.1946e+06	2.37074e+07	3.90893e+07	164.882	2.80309e+06	1.37052e+06	2.05618e+06	2.07659e+06	716503	34.5038	2.08263e+06	2.21803e+06	1.4882e+06	1.92962e+06	388230	20.1195	3.38731e+06	782384	3.44301e+06	2.53757e+06	1.52029e+06	59.9113
pos	DG(34:4p)	DG	34:4p	(34:4p)	572.481	C37H64O4		57.178	+H	14.3129	0.00501086	39.7862	0.107861	3.12169	0.0165811	0.0784616	0.118439	0.218103	0.00493839	-	C	-	C			10165.9	2.18201e+07	1.7253e+07	1.30278e+07	1.15025e+07	88.2923	1.837e+07	2.32187e+07	6.90131e+06	1.61633e+07	8.37951e+06	51.8427	1.81222e+07	8.75303e+06	1.31957e+07	1.3357e+07	4.68665e+06	35.0877	1.45043e+07	1.73371e+07	1.34181e+07	1.50865e+07	2.02336e+06	13.4117
neg	DGMG(18:3)	DGMG	18:03:00	(18:3)	676.367	C33H56O14		5.972	+HCOO	0.531012	0.096949	0.948796	0.812072	1.13795	0.52319	1.19936	0.217461	2.14298	0.00517462	B	-	-	B			1.58936e+08	2.61393e+06	3.58097e+06	5.50435e+07	8.99745e+07	163.461	2.86408e+06	4.02324e+06	7.49122e+06	4.79284e+06	2.40766e+06	50.2345	3.78315e+06	4.97927e+06	5.6692e+06	4.81054e+06	954278	19.8372	3.86217e+06	3.5479e+06	5.30356e+06	4.23787e+06	936190	22.091
pos	Cer(d18:0+pO_22:0+O)	Cer	d18:0+pO_22:0+O	(d18:0+pO_22:0+O)	655.611	C40H81O5N1		32.642	+H	0.685192	0.196557	1.12877	0.689315	1.15893	0.459528	1.02672	0.914979	1.69139	0.00957878	B	-	B	B			199260	1.06163e+08	9.70242e+07	6.77956e+07	5.87182e+07	86.6107	1.04072e+08	1.2069e+08	2.02603e+08	1.42455e+08	5.27479e+07	37.0277	1.87649e+08	2.26243e+08	1.97882e+08	2.03925e+08	1.99937e+07	9.80447	1.28955e+08	1.27803e+08	1.70502e+08	1.4242e+08	2.43264e+07	17.0808
pos	PC(34:2)	PC	1.41806	(34:2)	757.562	C42H80O8N1P1		57.269	+H	5.41629	0.0173978	10.818	0.0381709	0.333834	0.519497	0.030859	0.0450296	0.061635	0.0100473	C	-	C	C			10120.6	1.48527e+07	7.07268e+06	7.31184e+06	7.42419e+06	101.537	5.92847e+06	7.71469e+06	8.32723e+06	7.32346e+06	1.24632e+06	17.0182	6.31631e+06	3.3066e+06	5.02412e+06	4.88234e+06	1.50985e+06	30.9248	8.37523e+06	5.43484e+06	5.94492e+06	6.585e+06	1.57122e+06	23.8607
pos	PC(18:1_18:2)	PC	18:1_18:2	(18:1_18:2)	783.578	C44H82O8N1P1		35.323	+H	1.17027	0.434048	1.9544	0.110096	0.266853	0.0188906	0.13654	0.0314679	0.228027	0.0119995	A	A	A	B			5.7924e+08	357658	450716	1.9335e+08	3.34191e+08	172.843	607732	404830	652880	555147	132122	23.7994	733394	1.06823e+06	746568	849396	189627	22.3249	569329	593077	648430	603612	40589.3	6.72441
pos	PC(36:5)	PC	1.50347	(36:5)	779.547	C44H78O8N1P1		37.792	+H	1.29517	0.553033	2.19827	0.390653	0.0527042	0.14271	0.0239754	0.187763	0.040693	0.014352	C	-	C	-			1.90215e+06	5.91704e+06	1.24179e+07	6.74571e+06	5.30665e+06	78.667	1.54188e+06	1.86899e+06	51366.6	1.15408e+06	968882	83.9528	1.25863e+06	2.3029e+06	950024	1.50385e+06	708988	47.1449	392204	7.73052e+06	516643	2.87979e+06	4.20132e+06	145.89
pos	PC(18:3_18:2)	PC	18:3_18:2	(18:3_18:2)	779.547	C44H78O8N1P1		27.453	+H	1.29517	0.553033	2.19827	0.390653	0.0527042	0.14271	0.0239754	0.187763	0.040693	0.014352	A	A	A	A			1.90215e+06	1.85166e+07	1.62575e+07	1.22254e+07	9.0113e+06	73.7095	1.30374e+07	1.88131e+07	2.63799e+07	1.94101e+07	6.69123e+06	34.4729	2.30296e+07	2.21401e+07	2.17072e+07	2.22923e+07	674227	3.02449	2.44001e+07	1.60677e+07	2.6446e+07	2.23046e+07	5.49729e+06	24.6465
pos	DG(36:4p)	DG	36:4p	(36:4p)	600.512	C39H68O4		28.48	+H	1.08298	0.708022	1.98813	0.0648362	0.438493	0.0644135	0.220556	0.032967	0.404893	0.0157132	C	-	-	-			1.51623e+06	1.3934e+06	1.75342e+06	1.55435e+06	183013	11.7742	1.28526e+06	2.14848e+06	2.92789e+06	2.12055e+06	821669	38.748	1.7229e+06	1.81652e+06	2.2575e+06	1.93231e+06	285487	14.7744	1.41391e+06	1.18758e+06	3.24229e+06	1.94792e+06	1.12665e+06	57.8386
pos	PC(36:4)	PC	1.50278	(36:4)	781.562	C44H80O8N1P1		57.252	+H	5.51581	0.00618902	15.6191	0.122071	1.00247	0.997099	0.0641824	0.12361	0.181745	0.0160111	-	-	C	C			5451.16	2.24417e+08	5.62512e+08	2.62312e+08	2.83162e+08	107.949	6.9842e+07	8.67429e+07	2.04507e+06	5.28767e+07	4.48252e+07	84.7731	5.83073e+07	1.03032e+08	4.23738e+07	6.79043e+07	3.14472e+07	46.3111	1.78587e+07	3.4692e+08	2.39198e+07	1.29566e+08	1.88258e+08	145.299
pos	PC(18:1_18:1)	PC	18:1_18:1	(18:1_18:1)	785.593	C44H84O8N1P1		57.076	+H	1.88639	0.094697	4.1016	0.00330162	0.304052	0.094709	0.0741301	0.000336489	0.161182	0.0166556	C	A	C	C			40620.4	7.15315e+06	6.33886e+06	4.51088e+06	3.89271e+06	86.296	2.64061e+07	294524	1.13279e+06	9.27781e+06	1.48395e+07	159.946	331477	287304	548056	388946	139552	35.8796	952169	8.94836e+06	1.73898e+06	3.87984e+06	4.40707e+06	113.589
pos	PC(16:0_20:2)	PC	16:0_20:2	(16:0_20:2)	785.593	C44H84O8N1P1		14.658	+H	1.88639	0.094697	4.1016	0.00330162	0.304052	0.094709	0.0741301	0.000336489	0.161182	0.0166556	-	-	-	B			40620.4	1.84926e+09	1.36373e+09	1.07101e+09	9.5873e+08	89.5166	8.13729e+08	2.00946e+09	3.67998e+09	2.16772e+09	1.43967e+09	66.4137	2.81443e+06	2.47953e+09	1.6799e+08	8.83446e+08	1.38472e+09	156.74	5.37932e+09	4.10422e+09	1.83188e+07	3.16729e+09	2.80062e+09	88.4233
neg	DGMG(16:3)	DGMG	16:03:00	(16:3)	648.336	C31H52O14		4.812	+HCOO	0.649996	0.193631	1.07507	0.729616	1.12327	0.591099	1.04484	0.628932	1.72812	0.0169068	B	-	B	B			8.49251e+06	1.16416e+07	5.5361e+07	2.5165e+07	2.61978e+07	104.104	3.12348e+07	4.7357e+07	9.67527e+07	5.84482e+07	3.41381e+07	58.4075	6.38161e+07	3.48675e+07	6.26808e+07	5.37882e+07	1.63956e+07	30.4817	4.58346e+07	2.9543e+07	7.57789e+07	5.03855e+07	2.34515e+07	46.5442
pos	TG(22:6_10:3_14:4)	TG	22:6_10:3_14:4	(22:6_10:3_14:4)	752.502	C49H68O6		16.14	+H	0.277089	0.0936955	0.408108	0.139071	0.607275	0.255046	1.48803	0.0336145	2.19163	0.0176013	A	B	B	A			1.20393e+06	2.04932e+06	1.21508e+07	5.13468e+06	6.09081e+06	118.621	7.95277e+06	3.52314e+06	3.5771e+06	5.01767e+06	2.54202e+06	50.6613	1.49163e+07	4.05501e+06	6.57115e+06	8.51417e+06	5.68539e+06	66.7756	1.23138e+07	1.30824e+07	2.25551e+07	1.59838e+07	5.70392e+06	35.6857
pos	Cer(d18:1+hO_27:5)	Cer	d18:1+hO_27:5	(d18:1+hO_27:5)	697.601	C45H79O4N1		34.788	+H-H2O	1.06829	0.633541	1.34415	0.0908623	0.810491	0.253103	0.602977	0.0295472	0.758682	0.0196763	-	B	B	-			8.93946e+06	221502	356827	3.1726e+06	4.99471e+06	157.433	118598	552493	968891	546661	425177	77.7771	324135	237687	374036	311953	68985.7	22.1142	518421	255477	806402	526767	275558	52.3111
pos	PE(22:0_18:2)	PE	22:0_18:2	(22:0_18:2)	799.609	C45H86O8N1P1		35.114	+H	1.40978	0.243559	0.850854	0.596941	0.0492776	0.0169775	0.0579154	0.0658042	0.0349542	0.0317124	A	A	A	A			3.73396e+06	3.3811e+07	3.88408e+07	2.54619e+07	1.89843e+07	74.5595	3.76157e+07	3.50567e+07	4.84832e+07	4.03852e+07	7.12884e+06	17.6521	4.71494e+07	6.06732e+07	5.95056e+07	5.57761e+07	7.4937e+06	13.4353	3.82956e+07	3.27183e+07	3.98247e+07	3.69462e+07	3.74041e+06	10.1239
pos	DGDG(16:1_18:3)	DGDG	16:1_18:3	(16:1_18:3)	912.581	C49H84O15		18.355	+Na	1.27037	0.0890037	1.48314	0.0474443	0.887716	0.375013	0.598537	0.0275563	0.698782	0.0317536	A	A	A	A			1.18538e+06	2.49952e+07	7.14417e+07	3.25407e+07	3.57308e+07	109.803	2.61961e+07	2.58019e+07	2.23075e+07	2.47685e+07	2.14036e+06	8.64147	2.29982e+07	1.52213e+07	1.66477e+07	1.82891e+07	4.14013e+06	22.6372	1.79425e+07	3.44429e+07	1.68555e+07	2.30803e+07	9.85532e+06	42.7001
pos	PC(14:0_22:1)	PC	14:0_22:1	(14:0_22:1)	787.609	C44H86O8N1P1		13.463	+H	0.903527	0.879056	1.70551	0.462166	4.04648	0.0393407	2.37259	0.0930173	4.47854	0.0388112	B	-	-	-			353531	3.26796e+06	4.03946e+06	2.55365e+06	1.94402e+06	76.127	6.97411e+06	3.83816e+06	2.73879e+06	4.51702e+06	2.19775e+06	48.6549	4.10452e+06	2.69515e+06	2.78104e+06	3.19357e+06	790072	24.7394	2.4704e+06	5.81911e+06	2.67829e+06	3.65593e+06	1.87625e+06	51.3207
pos	MGDG(18:2_18:2)	MGDG	18:2_18:2	(18:2_18:2)	778.559	C45H78O10		23.925	+Na	1.06934	0.59312	1.23168	0.11352	0.699576	0.0840638	0.567987	0.0138666	0.654215	0.0444486	A	A	A	A			1.26077e+07	8.12259e+08	8.76352e+08	5.67073e+08	4.81249e+08	84.8655	2.19612e+09	8.4824e+08	1.06826e+09	1.37087e+09	7.23102e+08	52.7476	3.75095e+09	1.68122e+07	1.34914e+09	1.70563e+09	1.89242e+09	110.951	1.39208e+09	1.07306e+09	1.04946e+09	1.17153e+09	1.91366e+08	16.3346
pos	PE(16:0_18:1)	PE	16:0_18:1	(16:0_18:1)	717.531	C39H76O8N1P1		30.923	+H	1.1562	0.413456	1.11183	0.745341	0.753872	0.193717	0.678048	0.3352	0.652028	0.0524713	A	A	A	A			762006	732495	712263	735588	25015.6	3.40076	447755	578721	527962	518146	66032.5	12.744	709785	738702	521974	656820	117672	17.9154	684765	548106	472704	568525	107495	18.9077
pos	PC(16:0_18:2)	PC	16:0_18:2	(16:0_18:2)	757.562	C42H80O8N1P1		35.192	+H	3.31864	0.104531	5.51194	0.250625	0.0163469	0.0210007	0.00296573	0.190736	0.00492579	0.0582209	A	A	A	C			1.16796e+06	3.31431e+06	4.96231e+06	3.14819e+06	1.90262e+06	60.4353	4.02845e+06	2.59394e+06	4.96509e+06	3.86249e+06	1.19425e+06	30.9192	7.24518e+06	7.05616e+06	5.5811e+06	6.62748e+06	911111	13.7475	2.3853e+06	6.10191e+06	5.16707e+06	4.55143e+06	1.93328e+06	42.4763
pos	PC(36:3)	PC	1.50208	(36:3)	783.578	C44H82O8N1P1		57.101	+H	2.57341	0.0971914	3.50754	0.0371548	77.8652	0.0563168	22.1993	0.0597291	30.2576	0.0583906	-	-	-	C			1071.69	7.95967e+06	6.36481e+06	4.77518e+06	4.2107e+06	88.1788	4.27806e+06	6.63843e+06	8.97411e+06	6.6302e+06	2.34804e+06	35.4143	5.51669e+06	7.08291e+06	7.92668e+06	6.84209e+06	1.22291e+06	17.8734	5.93922e+06	6.86376e+06	1.10601e+07	7.95438e+06	2.72911e+06	34.3095
pos	PC(16:0_20:3)	PC	16:0_20:3	(16:0_20:3)	783.578	C44H82O8N1P1		20.878	+H	2.57341	0.0971914	3.50754	0.0371548	77.8652	0.0563168	22.1993	0.0597291	30.2576	0.0583906	B	-	-	-			1071.69	3.4175e+07	1.9717e+06	1.20492e+07	1.91868e+07	159.236	1.65704e+06	2.33385e+06	2.53544e+06	2.17544e+06	460127	21.151	1.37439e+06	6.86097e+06	3.52551e+06	3.92029e+06	2.76451e+06	70.5181	4.23957e+06	2.71394e+06	1.15373e+06	2.70241e+06	1.54295e+06	57.0954
pos	TG(18:3_14:4_22:5)	TG	18:3_14:4_22:5	(18:3_14:4_22:5)	866.642	C57H86O6		35.02	+H	0.657484	0.488409	1.11564	0.851664	2.09441	0.133286	1.87732	0.183444	3.1855	0.062019	-	-	A	-			8.69478e+06	1.40386e+06	1.5881e+06	3.89558e+06	4.15725e+06	106.717	2.21611e+06	1.11883e+06	1.82771e+06	1.72088e+06	556385	32.3314	2.06993e+06	2.12705e+06	2.17685e+06	2.12461e+06	53500.9	2.51815	971810	861031	1.26133e+06	1.03139e+06	206691	20.0401
pos	TG(16:1_14:2_16:1)	TG	16:1_14:2_16:1	(16:1_14:2_16:1)	770.642	C49H86O6		12.208	+Na	#DIV_0!	0.42265	#DIV_0!	0.334439	#DIV_0!	0.0641247	0.16718	0.403785	6.61738	0.0652454	-	-	B	-			0	165520	262329	142616	132656	93.0158	55338.9	245121	1.08973e+06	463396	550656	118.831	15432.1	36930.1	44118.2	32160.1	14926.1	46.4118	6547.43	8581.91	36429.8	17186.4	16696.3	97.1484
pos	DGDG(16:0_18:0)	DGDG	16:0_18:0	(16:0_18:0)	920.644	C49H92O15		31.288	+Na	1.68343	0.271048	1.07742	0.910235	0.91741	0.876869	0.851487	0.771378	0.544964	0.0687421	-	A	-	-			2.35938e+07	7.90276e+06	6.62631e+06	1.27076e+07	9.44929e+06	74.3592	8.48182e+06	1.00228e+07	3.00146e+06	7.1687e+06	3.69027e+06	51.4776	8.71759e+06	3.29249e+06	5.77726e+06	5.92911e+06	2.71573e+06	45.8033	7.08698e+06	6.77776e+06	5.96177e+06	6.60884e+06	581316	8.79603
pos	TG(26:0_16:0_16:1)	TG	26:0_16:0_16:1	(26:0_16:0_16:1)	944.877	C61H116O6		51.593	+NH4	0.616103	0.0353409	0.684841	0.0323011	1.05148	0.769367	1.53536	0.114974	1.70666	0.0727136	A	A	-	A			4.11579e+06	45613.5	50021.6	1.40381e+06	2.34864e+06	167.305	110946	82555.4	63528.9	85676.9	23862.3	27.8515	165892	194748	198226	186288	17749.5	9.52799	35731	3819.02	1878.67	13809.6	19009.3	137.653
pos	PC(16:1_18:2)	PC	16:1_18:2	(16:1_18:2)	755.547	C42H78O8N1P1		26.807	+H	1.00205	0.996792	1.65272	0.301696	1.75362	0.193867	1.06105	0.821043	1.75004	0.0731434	A	-	-	-			1.69459e+07	488867	515719	5.9835e+06	9.49374e+06	158.665	556081	536090	685597	592590	81165.1	13.6967	725687	761817	748280	745261	18253.2	2.44923	421802	553160	660551	545171	119575	21.9334
pos	PI(40:9)	PI	1.67292	(40:9)	904.51	C49H77O13N0P1		10.917	+NH4	1.65406	0.189649	1.82537	0.254824	0.691575	0.404485	0.378869	0.151246	0.418108	0.0736057	-	-	C	-			6.94439e+06	2.49708e+06	3.16328e+06	4.20158e+06	2.39858e+06	57.0876	2.89861e+06	2.80992e+06	3.70843e+06	3.13899e+06	495141	15.7739	4.1073e+06	5.20191e+06	3.96853e+06	4.42591e+06	675607	15.2648	2.10949e+06	2.42858e+06	3.53782e+06	2.69196e+06	749706	27.8498
pos	PC(34:1)	PC	1.41736	(34:1)	759.578	C42H82O8N1P1		55.905	+Na	2.57681	0.020065	11.1217	0.0975083	1.13565	0.819171	0.102111	0.0984678	0.440719	0.075268	C	C	-	C			18343	1.24106e+07	1.35017e+07	8.64355e+06	7.48954e+06	86.6489	8.82658e+06	1.60446e+07	1.57232e+07	1.35315e+07	4.07772e+06	30.1351	1.13129e+07	1.56364e+07	1.76005e+07	1.48499e+07	3.21672e+06	21.6615	1.1675e+07	1.01994e+07	1.36424e+07	1.18389e+07	1.72732e+06	14.5902
pos	TG(22:5_11:2_11:2)	TG	22:5_11:2_11:2	(22:5_11:2_11:2)	732.533	C47H72O6		21.852	+Na	0.677827	0.162097	0.625547	0.182887	0.961955	0.841947	1.53778	0.18228	1.41918	0.0768326	B	B	-	-			7.54184e+07	5.12705e+06	4.15688e+06	2.82341e+07	4.08657e+07	144.739	3.54457e+06	2.59898e+06	2.11206e+06	2.75187e+06	728389	26.4689	2.93288e+06	2.84485e+06	3.39895e+06	3.05889e+06	297770	9.73458	4.24152e+06	5.95276e+06	3.89525e+06	4.69651e+06	1.10163e+06	23.4564
pos	MGDG(18:3_19:2)	MGDG	18:3_19:2	(18:3_19:2)	790.559	C46H78O10		23.107	+Na	1.07407	0.524953	1.61838	0.115319	1.3056	0.0518363	0.806734	0.327003	1.21557	0.0805951	A	-	A	A			2.23897e+07	993746	925700	8.10306e+06	1.23727e+07	152.691	574195	1.27426e+06	2.29059e+06	1.37968e+06	863041	62.5536	974682	1.17092e+06	1.22309e+06	1.1229e+06	130984	11.6648	1.08414e+06	1.14344e+06	1.18489e+06	1.13749e+06	50635.7	4.45153
pos	Cer(d16:0+pO_18:1)	Cer	d16:0+pO_18:1	(d16:0+pO_18:1)	553.507	C34H67O4N1		21.901	+H	1.31804	0.191139	1.55703	0.113267	0.85096	0.36638	0.546527	0.0795246	0.645626	0.0825652	-	-	-	B			1.41031e+06	0	216983	542431	759396	139.999	0	0	0	0	0	#DIV/0!	0	0	0	0	0	#DIV/0!	0	0	0	0	0	#DIV/0!
pos	Cer(d18:1+hO_26:0+O)	Cer	d18:1+hO_26:0+O	(d18:1+hO_26:0+O)	709.658	C44H87O5N1		34.722	+H	0.79778	0.363363	1.27738	0.482609	1.13266	0.516305	0.886711	0.690683	1.41977	0.0834673	B	B	B	B			6.45456e+06	1.32039e+06	1.64302e+06	3.13933e+06	2.87561e+06	91.5996	2.22759e+06	1.49471e+06	2.47808e+06	2.06679e+06	511024	24.7255	777083	2.40302e+06	1.99775e+06	1.72595e+06	846360	49.0373	1.95565e+06	2.26728e+06	2.02068e+06	2.0812e+06	164395	7.89906
pos	MGDG(17:0_18:3)	MGDG	17:0_18:3	(17:0_18:3)	766.559	C44H78O10		26.557	+Na	0.968393	0.865704	1.25088	0.586001	1.59347	0.0984296	1.27388	0.494058	1.64548	0.0850577	A	-	-	-			2.99926e+07	4.07351e+07	4.08019e+07	3.71765e+07	6.22152e+06	16.7351	2.25857e+07	4.55467e+07	7.27695e+07	4.69673e+07	2.5122e+07	53.4884	2.49678e+07	6.01347e+07	5.41798e+07	4.64275e+07	1.88216e+07	40.5398	4.36691e+07	4.67172e+07	2.99118e+07	4.00994e+07	8.95338e+06	22.328
pos	Cer(d18:0+pO_22:0)	Cer	d18:0+pO_22:0	(d18:0+pO_22:0)	639.617	C40H81O4N1		33.159	+H	0.627758	0.0513801	0.940411	0.798282	0.815225	0.218051	0.866881	0.574845	1.29863	0.0864626	B	B	B	B			9.65258e+06	47834.8	0	3.23347e+06	5.55916e+06	171.926	0	0	0	0	0	#DIV/0!	0	56021.4	0	18673.8	32344	173.205	0	0	0	0	0	#DIV/0!
pos	PC(16:0_18:3)	PC	16:0_18:3	(16:0_18:3)	755.547	C42H78O8N1P1		30.736	+H	0.704411	0.584127	1.08121	0.911721	0.00424963	0.146308	0.00393043	0.181679	0.00603288	0.0872249	A	A	A	A			3.26882e+06	3.21125e+06	3.54309e+06	3.34105e+06	177323	5.3074	2.92301e+06	3.8721e+06	2.07712e+06	2.95741e+06	897987	30.3639	2.81888e+06	1.77325e+06	2.34611e+06	2.31275e+06	523616	22.6404	3.95252e+06	1.09803e+06	2.26932e+06	2.43996e+06	1.43487e+06	58.8073
pos	TG(18:1_18:2_18:2)	TG	18:1_18:2_18:2	(18:1_18:2_18:2)	880.752	C57H100O6		40.453	+NH4	0.688262	0.245976	1.07853	0.722062	1.06131	0.779731	0.98404	0.884476	1.54202	0.0880119	A	A	A	A			4.86192e+07	2.65049e+07	3.40325e+07	3.63855e+07	1.12433e+07	30.9006	3.43246e+07	2.9681e+07	1.32607e+07	2.57554e+07	1.10671e+07	42.9699	2.83782e+07	4.62149e+07	4.65231e+07	4.03721e+07	1.03881e+07	25.731	1.66407e+07	1.85859e+07	3.97546e+06	1.30673e+07	7.93365e+06	60.7136
pos	TG(18:4_16:1_18:3)	TG	18:4_16:1_18:3	(18:4_16:1_18:3)	846.674	C55H90O6		35.383	+NH4	1.02935	0.899613	1.27428	0.179019	1.49884	0.0484153	1.17622	0.121101	1.45611	0.088829	B	B	B	C			6.07017e+06	9.96706e+06	8.72958e+06	8.2556e+06	1.99122e+06	24.1196	5.76079e+06	9.50434e+06	1.02285e+07	8.49787e+06	2.39788e+06	28.2174	1.16562e+07	1.0349e+07	9.55476e+06	1.052e+07	1.0611e+06	10.0865	1.20116e+07	1.13632e+07	1.37466e+07	1.23738e+07	1.23225e+06	9.95853
pos	DG(16:0_18:3)	DG	16:0_18:3	(16:0_18:3)	590.491	C37H66O5		24.071	+H	1.43656	0.222257	1.531	0.134516	0.780273	0.385903	0.50965	0.0539875	0.543152	0.0932138	A	A	A	A			1.82168e+06	1.94236e+07	2.41788e+07	1.51414e+07	1.17777e+07	77.7847	1.7824e+07	2.73778e+07	4.06898e+07	2.86305e+07	1.14843e+07	40.1121	3.68153e+07	3.82457e+07	2.54422e+07	3.35011e+07	7.01577e+06	20.9419	2.52507e+07	2.30708e+07	4.13726e+07	2.9898e+07	9.99685e+06	33.4365
pos	DGDG(18:0_18:3)	DGDG	18:0_18:3	(18:0_18:3)	942.628	C51H90O15		26.315	+Na	1.0383	0.852972	1.0276	0.90519	0.610685	0.0618142	0.594281	0.136761	0.588157	0.0941868	A	A	A	A			764701	2.75567e+06	1.4809e+06	1.66709e+06	1.00846e+06	60.4922	2.43526e+06	3.93421e+06	1.79951e+06	2.72299e+06	1.09605e+06	40.2517	3.3829e+06	2.19774e+06	2.51198e+06	2.69754e+06	613982	22.7608	5.32594e+06	2.26305e+06	1.74199e+06	3.11033e+06	1.93638e+06	62.2566
pos	PC(27:1_11:4)	PC	27:1_11:4	(27:1_11:4)	807.578	C46H82O8N1P1		45.042	+H	1.10389	0.721734	2.3321	0.0176087	0.574619	0.160576	0.246396	0.0191999	0.52054	0.097228	-	B	-	-			421757	4.49542e+06	6.17523e+06	3.69747e+06	2.95857e+06	80.0162	4.13701e+06	3.21099e+06	5.54653e+06	4.29818e+06	1.17608e+06	27.3623	5.17899e+06	5.36685e+06	3.11254e+06	4.55279e+06	1.25083e+06	27.4739	3.37896e+06	4.22079e+06	3.87444e+06	3.82473e+06	423111	11.0625
pos	PE(19:0_21:1)	PE	19:0_21:1	(19:0_21:1)	801.625	C45H88O8N1P1		33.781	+Na	1.9236	0.189302	1.72206	0.317065	0.67919	0.415513	0.394406	0.189774	0.353084	0.108332	-	-	-	B			1.85507e+07	3.96722e+06	3.73762e+06	8.75186e+06	8.48686e+06	96.9721	4.27144e+06	4.8479e+06	5.94111e+06	5.02015e+06	848059	16.8931	8.06822e+06	7.66445e+06	5.5716e+06	7.10143e+06	1.34016e+06	18.8717	3.81915e+06	3.21691e+06	2.47423e+07	1.05928e+07	1.22575e+07	115.716
pos	dMePE(17:1_18:3)	dMePE	17:1_18:3	(17:1_18:3)	753.531	C42H76O8N1P1		18.909	+H	1.37388	0.229028	1.13537	0.400815	0.82823	0.348607	0.729481	0.0819054	0.60284	0.113661	-	-	B	-			988099	6.44053e+06	5.99441e+06	4.47434e+06	3.02741e+06	67.6614	8.44867e+06	5.66715e+06	1.6911e+06	5.26897e+06	3.39634e+06	64.4592	2.37676e+06	4.39403e+06	2.56758e+06	3.11279e+06	1.11369e+06	35.7777	2.98017e+06	7.62678e+06	2.33991e+06	4.31562e+06	2.88536e+06	66.8586
pos	Cer(d18:2_27:5)	Cer	d18:2_27:5	(d18:2_27:5)	679.59	C45H77O3N1		34.839	+H	1.24013	0.437701	1.44355	0.0571782	0.577848	0.195225	0.400297	0.0419957	0.465959	0.11483	B	-	-	B			8.93943e+06	923766	846753	3.56998e+06	4.65024e+06	130.259	707805	1.12292e+06	1.55307e+06	1.12793e+06	422655	37.4717	843879	447206	1.02997e+06	773684	297654	38.4724	1.13344e+06	1.03324e+06	1.15028e+06	1.10566e+06	63272.6	5.72263
pos	TG(22:5_10:3_14:4)	TG	22:5_10:3_14:4	(22:5_10:3_14:4)	754.517	C49H70O6		22.132	+H	0.686797	0.174412	0.59972	0.163447	1.18654	0.509184	1.97849	0.0952653	1.72764	0.117868	B	B	B	B			7.5309e+07	2.73936e+06	4.35009e+06	2.74662e+07	4.1441e+07	150.88	9.13269e+06	4.77022e+06	9.30984e+06	7.73758e+06	2.57133e+06	33.2318	1.31043e+07	7.78649e+06	4.72615e+06	8.53897e+06	4.23945e+06	49.6482	1.91199e+06	5.02249e+06	2.77095e+06	3.23515e+06	1.60637e+06	49.6536
pos	TG(16:0_18:1_20:5)	TG	16:0_18:1_20:5	(16:0_18:1_20:5)	878.736	C57H98O6		41.989	+H	0.7107	0.102817	0.692579	0.19309	0.989231	0.920809	1.42833	0.201923	1.39191	0.118399	A	A	B	A			2.59766e+07	6.20855e+07	2.13714e+07	3.64778e+07	2.22961e+07	61.1223	1.34647e+07	7.52554e+06	8.39936e+07	3.49946e+07	4.25381e+07	121.556	1.29648e+07	5.57091e+08	4.0674e+07	2.03577e+08	3.06466e+08	150.541	2.798e+09	6.20961e+08	1.88033e+06	1.14028e+09	1.46862e+09	128.794
pos	TG(18:2_18:2_18:3)	TG	18:2_18:2_18:3	(18:2_18:2_18:3)	876.721	C57H96O6		37.727	+NH4	0.882015	0.39395	0.972772	0.846755	1.17988	0.219998	1.21291	0.265047	1.33771	0.118686	A	A	A	A			3.44194e+06	515995	685000	1.54765e+06	1.64268e+06	106.141	604086	515879	856258	658741	176649	26.8161	800479	700296	550243	683672	125944	18.4217	447487	349384	546225	447699	98420.9	21.9837
pos	MGDG(18:0_18:3)	MGDG	18:0_18:3	(18:0_18:3)	780.575	C45H80O10		28.081	+Na	0.701034	0.195314	1.21583	0.605999	1.32896	0.336321	1.09305	0.801382	1.89571	0.118691	A	A	A	A			5.9224e+07	3.12093e+07	1.0803e+08	6.61545e+07	3.88764e+07	58.7661	8.86648e+07	9.73223e+07	2.038e+08	1.29929e+08	6.41204e+07	49.3503	3.28638e+06	2.16883e+08	1.00842e+08	1.07004e+08	1.06932e+08	99.9324	1.89145e+08	2.46258e+08	4.67926e+07	1.60732e+08	1.02723e+08	63.9098
pos	PE(24:0_18:2)	PE	24:0_18:2	(24:0_18:2)	827.64	C47H90O8N1P1		37.121	+H	1.21258	0.284181	1.36716	0.230671	0.85538	0.222672	0.62566	0.128879	0.70542	0.12081	A	A	A	A			474487	9.36284e+07	1.25787e+08	7.32965e+07	6.50832e+07	88.7944	8.80597e+07	9.5097e+07	1.35678e+08	1.06278e+08	2.57028e+07	24.1844	1.17958e+08	1.17559e+08	8.23963e+07	1.05971e+08	2.04175e+07	19.267	7.84174e+07	8.24527e+07	1.16456e+08	9.2442e+07	2.08943e+07	22.6027
pos	PG(18:2_18:2)	PG	18:2_18:2	(18:2_18:2)	770.51	C42H75O10N0P1		19.472	+NH4	0.957979	0.712793	1.1268	0.549977	1.31686	0.156065	1.16867	0.44983	1.37463	0.1227	A	A	A	A			513155	5.23004e+06	5.69214e+06	3.81178e+06	2.86602e+06	75.1885	4.32928e+06	7.14918e+06	8.19255e+06	6.557e+06	1.99855e+06	30.4797	6.27514e+06	6.97347e+06	6.85337e+06	6.70066e+06	373374	5.5722	6.88027e+06	6.40319e+06	1.02658e+07	7.84975e+06	2.10591e+06	26.8278
pos	PA(18:2_18:2)	PA	18:2_18:2	(18:2_18:2)	696.473	C39H69O8N0P1		57.156	+NH4	1.39022	0.128426	1.41082	0.407815	0.975788	0.83077	0.691646	0.384419	0.701895	0.127475	A	A	A	A			9.15836e+08	2.05958e+07	1.91202e+07	3.18517e+08	5.17294e+08	162.407	2.16875e+07	2.21619e+07	1.12663e+07	1.83719e+07	6.15819e+06	33.5196	1.69327e+07	9.11392e+06	1.24403e+07	1.2829e+07	3.92385e+06	30.5859	1.16712e+07	2.27971e+07	1.32859e+07	1.59181e+07	6.01189e+06	37.7677
pos	MGDG(18:3_18:4)	MGDG	18:3_18:4	(18:3_18:4)	772.513	C45H72O10		17.655	+Na	0.835805	0.390109	1.66437	0.0686573	1.13369	0.398548	0.681151	0.1167	1.3564	0.128321	A	A	A	A			4.59676e+07	5.59191e+07	468403	3.41183e+07	2.95634e+07	86.6497	2.68264e+07	8.12042e+07	1.82173e+08	9.67343e+07	7.88289e+07	81.4901	9.8648e+06	1.84825e+08	1.22552e+08	1.05747e+08	8.86826e+07	83.8627	1.06116e+08	2.60477e+08	3.4101e+07	1.33565e+08	1.15657e+08	86.5928
pos	PS(22:0_18:2)	PS	22:0_18:2	(22:0_18:2)	843.599	C46H86O10N1P1		34.431	+H	0.540139	0.443642	0.253887	0.232898	4.70676	0.152788	18.5388	0.118007	8.71399	0.129369	C	B	A	A			3.28415e+07	4741.74	47761.7	1.09647e+07	1.89459e+07	172.791	7080.7	16031.7	26203.1	16438.5	9567.69	58.2029	113461	1.34717e+06	2.61929e+06	1.35998e+06	1.25296e+06	92.1314	20483.8	10767.6	1.92858e+06	653276	1.10445e+06	169.064
neg	DGMG(16:0)	DGMG	16:00:00	(16:0)	654.383	C31H58O14		8.308	+HCOO	0.610684	0.0956215	0.963862	0.93053	1.15645	0.585061	1.19981	0.684595	1.89369	0.137658	B	-	-	-			3.41222e+07	5.20453e+06	2.86617e+06	1.40643e+07	1.74099e+07	123.788	3.13583e+06	2.31187e+06	1.91565e+06	2.45445e+06	622459	25.3604	1.22429e+06	6.54286e+06	1.7733e+06	3.18015e+06	2.9251e+06	91.9799	3.72238e+06	3.98648e+06	785813	2.83156e+06	1.77658e+06	62.7422
pos	PE(16:0_18:2)	PE	16:0_18:2	(16:0_18:2)	715.515	C39H74O8N1P1		27.195	+H	1.53808	0.263537	1.7456	0.292002	0.694733	0.120306	0.397991	0.185042	0.451689	0.13933	A	A	A	A			2.11621e+07	627830	784538	7.52482e+06	1.18105e+07	156.954	332490	741889	1.38056e+06	818314	528200	64.5473	747817	490470	742806	660364	147154	22.2838	280898	88176.8	1.16563e+06	511568	574571	112.316
pos	DGDG(18:3_20:6)	DGDG	18:3_20:6	(18:3_20:6)	958.565	C53H82O15		16.786	+H	1.54435	0.171588	1.88234	0.0448869	0.950123	0.8497	0.504756	0.0373684	0.615224	0.140856	A	A	A	-			7.1175e+07	4.11037e+07	2.71434e+07	4.64741e+07	2.25017e+07	48.4177	2.63025e+07	4.51407e+07	1.17296e+07	2.77243e+07	1.67508e+07	60.4194	2.86038e+07	1.56183e+07	1.89589e+07	2.10603e+07	6.74294e+06	32.0173	2.60265e+07	2.82118e+07	1.87027e+07	2.43137e+07	4.9806e+06	20.4848
pos	PE(36:5)	PE	1.50347	(36:5)	737.5	C41H72O8N1P1		27.511	+H	1.50186	0.250077	1.12645	0.637376	0.775476	0.0599775	0.688423	0.257915	0.516342	0.146367	-	-	C	C			1.29512e+06	1.00551e+07	4.61657e+06	5.32228e+06	4.42245e+06	83.0932	1.04894e+07	1.22532e+07	4.23112e+06	8.99122e+06	4.21564e+06	46.8862	3.45832e+06	4.85159e+06	6.38108e+06	4.897e+06	1.46191e+06	29.8531	6.86989e+06	8.92484e+06	5.03514e+06	6.94329e+06	1.94588e+06	28.0254
pos	PI(18:0_18:2)	PI	18:0_18:2	(18:0_18:2)	862.557	C45H83O13N0P1		25.014	+NH4	1.2171	0.493592	1.39987	0.360869	1.79534	0.00110188	1.2825	0.365042	1.4751	0.150435	A	A	A	A			2.35432e+06	3.33816e+06	3.15232e+06	2.94827e+06	522700	17.7291	2.03341e+06	3.19272e+06	4.38662e+06	3.20425e+06	1.17665e+06	36.7216	1.98009e+06	4.27587e+06	3.41995e+06	3.2253e+06	1.1602e+06	35.972	2.40035e+06	2.54219e+06	2.80765e+06	2.58339e+06	206749	8.00301
pos	TG(18:2p_12:4_12:4)	TG	18:2p_12:4_12:4	(18:2p_12:4_12:4)	686.491	C45H66O5		19.749	+Na	0.752127	0.388402	1.39597	0.213403	0.357894	0.0496252	0.256377	0.0170388	0.475842	0.153415	-	-	B	-			8.35778e+07	2191.74	3564.8	2.78612e+07	4.8252e+07	173.187	3851.5	4671.64	7433.41	5318.85	1876.61	35.2823	3635.09	6511.59	5076.12	5074.26	1438.25	28.3441	3034.29	2442.22	3713.5	3063.34	636.141	20.7663
pos	DG(18:2_18:2)	DG	18:2_18:2	(18:2_18:2)	616.507	C39H68O5		29.244	+Na	1.11674	0.634908	1.37873	0.00618191	0.669302	0.0306376	0.485449	0.0083393	0.599338	0.154006	A	A	A	A			1.63101e+06	8.36219e+06	1.0789e+07	6.92742e+06	4.74461e+06	68.4903	7.5411e+06	9.25598e+06	1.74013e+07	1.13995e+07	5.26798e+06	46.2126	5.11504e+06	7.74409e+06	7.32348e+06	6.72754e+06	1.41221e+06	20.9915	1.26882e+07	1.46325e+07	8.60132e+06	1.1974e+07	3.07837e+06	25.7088
pos	DG(18:1_18:3)	DG	18:1_18:3	(18:1_18:3)	616.507	C39H68O5		23.932	+H	1.11674	0.634908	1.37873	0.00618191	0.669302	0.0306376	0.485449	0.0083393	0.599338	0.154006	B	A	A	A			1.63101e+06	1.26413e+06	1.52804e+06	1.4744e+06	189231	12.8345	2.0598e+06	1.09282e+06	1.27786e+06	1.47683e+06	513278	34.7555	2.32734e+06	3.35122e+06	2.31371e+06	2.66409e+06	595109	22.3382	1.18969e+06	1.54045e+06	1.54236e+06	1.42417e+06	203062	14.2583
pos	TG(17:0_11:4_22:5)	TG	17:0_11:4_22:5	(17:0_11:4_22:5)	816.627	C53H84O6		33.344	+Na	0.58117	0.321152	0.580721	0.402628	1.13556	0.723662	1.95543	0.255072	1.95392	0.154631	-	B	-	B			8.04252e+06	1.12793e+07	6.09083e+06	8.47088e+06	2.62062e+06	30.9368	1.3886e+06	4.79982e+06	6.87229e+06	4.35357e+06	2.76895e+06	63.6018	2.32499e+07	1.0521e+07	1.75436e+06	1.18418e+07	1.08085e+07	91.2744	1.01601e+07	2.04239e+07	7.22744e+07	3.42861e+07	3.32967e+07	97.114
pos	So(d18:0+pO)	So	d18:0+pO	(d18:0+pO)	317.293	C18H39O3N1		7.233	+H	1.57015	0.135287	1.67415	0.0898394	1.04158	0.823779	0.622158	0.101195	0.663366	0.156349	B	-	-	-		Metabolic pathways;Other	4890.35	6.12133e+07	1.02455e+08	5.45577e+07	5.15483e+07	94.4839	1.13577e+08	2.6833e+08	4.23792e+08	2.68567e+08	1.55108e+08	57.7539	2.79914e+07	3.31897e+08	1.39931e+08	1.66607e+08	1.53699e+08	92.2526	7.91986e+08	6.32206e+08	8.0693e+07	5.01628e+08	3.73192e+08	74.3961
pos	PS(22:2_14:4)	PS	22:2_14:4	(22:2_14:4)	779.474	C42H70O10N1P1		15.674	+H	1.37438	0.595497	0.847684	0.679026	3.226	0.110842	3.80566	0.100853	2.34724	0.156518	-	-	-	B			1.13609e+06	0	0	378696	655921	173.205	0	0	0	0	0	#DIV/0!	0	0	0	0	0	#DIV/0!	28065.9	0	0	9355.31	16203.9	173.205
pos	PG(18:3_18:2)	PG	18:3_18:2	(18:3_18:2)	768.494	C42H73O10N0P1		22.172	+Na	1.1062	0.75948	0.5725	0.218918	0.451942	0.00318035	0.789419	0.674889	0.408552	0.156951	-	B	-	-			2.43187e+06	3.50984e+07	4.35773e+07	2.70358e+07	2.17253e+07	80.3575	2.11361e+07	3.99077e+07	6.9495e+07	4.35129e+07	2.43802e+07	56.0298	2.56496e+06	2.06198e+07	6.63049e+07	2.98299e+07	3.28529e+07	110.134	3.63325e+07	1.48168e+08	4.16717e+07	7.53906e+07	6.30833e+07	83.6752
pos	PE(24:1_18:3)	PE	24:1_18:3	(24:1_18:3)	823.609	C47H86O8N1P1		33.779	+H	1.7712	0.218224	1.54262	0.379212	0.808667	0.379178	0.524216	0.264935	0.456565	0.15926	A	A	A	B			1.87439e+07	1.73677e+06	3.31461e+06	7.93175e+06	9.39675e+06	118.47	1.38815e+06	2.30132e+06	2.07209e+06	1.92052e+06	475079	24.737	1.93396e+06	2.47455e+06	1.17122e+06	1.85991e+06	654817	35.2069	4.51423e+06	1.93082e+06	1.57965e+06	2.6749e+06	1.60255e+06	59.9108
pos	PS(16:0_16:0)	PS	16:0_16:0	(16:0_16:0)	735.505	C38H74O10N1P1		19.226	+Na	1.87162	0.137758	1.78555	0.0975971	1.07794	0.703649	0.6037	0.121556	0.575939	0.163333	-	A	A	A			2769	2.54741e+06	2.4706e+06	1.67359e+06	1.44748e+06	86.4897	1.54817e+06	2.51704e+06	2.97859e+06	2.34793e+06	730052	31.0934	1.59244e+06	2.25001e+06	1.94206e+06	1.92817e+06	329006	17.0631	1.72137e+06	1.51691e+06	2.47218e+06	1.90349e+06	503002	26.4253
pos	Cer(d18:2_26:0+O)	Cer	d18:2_26:0+O	(d18:2_26:0+O)	691.648	C44H85O4N1		33.687	+H	1.1298	0.555988	1.17256	0.328997	0.767842	0.15377	0.654844	0.066403	0.679628	0.164482	B	B	B	B			548188	5.86345e+06	6.14229e+06	4.18464e+06	3.15235e+06	75.3313	5.49825e+06	6.98798e+06	3.54449e+06	5.34357e+06	1.72695e+06	32.3182	4.60325e+06	3.03336e+06	4.02515e+06	3.88725e+06	793976	20.4251	5.19347e+06	6.12056e+06	4.43292e+06	5.24898e+06	845184	16.1019
pos	PE(16:0_16:0)	PE	16:0_16:0	(16:0_16:0)	691.515	C37H74O8N1P1		24.211	+Na	1.35339	0.171626	1.41295	0.384669	0.979973	0.837246	0.693566	0.366071	0.72409	0.167491	A	A	A	-			9.02143e+08	5.40747e+06	4.83298e+06	3.04128e+08	5.17896e+08	170.289	9.31801e+06	5.37e+06	2.74822e+06	5.81207e+06	3.30713e+06	56.901	4.27211e+06	2.98186e+06	4.01946e+06	3.75781e+06	683761	18.1957	3.78436e+06	5.54751e+06	3.80356e+06	4.37848e+06	1.01246e+06	23.1235
pos	PC(22:5_14:1)	PC	22:5_14:1	(22:5_14:1)	777.531	C44H76O8N1P1		26.799	+H	0.72198	0.640716	0.805071	0.740921	1.2315	0.678854	1.52968	0.228206	1.70573	0.169907	-	-	B	-			1.51437e+08	790846	1.00501e+06	5.10777e+07	8.69141e+07	170.16	946348	1.01086e+06	1.46018e+06	1.13913e+06	279903	24.5717	574933	1.9306e+06	1.09853e+06	1.20135e+06	683658	56.9073	749994	1.17122e+06	1.11189e+06	1.01104e+06	228007	22.5518
pos	Cer(d18:1+hO_26:0)	Cer	d18:1+hO_26:0	(d18:1+hO_26:0)	693.663	C44H87O4N1		35.448	+H	0.850802	0.330625	0.998813	0.994059	0.713681	0.118255	0.71453	0.074303	0.838833	0.173064	B	B	B	B			7.17074e+06	2.54438e+06	3.19373e+06	4.30295e+06	2.50471e+06	58.2092	3.10883e+06	7.54945e+06	8.97332e+06	6.54386e+06	3.05883e+06	46.7435	8.64098e+06	5.85351e+06	3.70129e+06	6.06526e+06	2.47664e+06	40.8333	5.44976e+06	6.5564e+06	7.85456e+06	6.62024e+06	1.20367e+06	18.1817
pos	SM(d39:7+hO)	SM	d39:7+hO	(d39:7+hO)	776.547	C44H77O7N2P1		27.259	+H	0.948745	0.842732	1.2048	0.423932	1.24208	0.34249	1.03095	0.819151	1.30919	0.180309	-	C	C	C			1.99488e+07	7.30519e+06	1.20698e+07	1.31079e+07	6.38539e+06	48.714	6.89751e+06	7.47666e+06	1.25887e+07	8.98764e+06	3.13206e+06	34.8486	52518.8	8.19359e+06	1.00679e+07	6.10468e+06	5.32445e+06	87.2191	6.86813e+06	7.12105e+06	7.33525e+06	7.10814e+06	233830	3.28961
pos	TG(4:0_13:0_16:1)	TG	4:0_13:0_16:1	(4:0_13:0_16:1)	594.486	C36H66O6		12.976	+Na	1.44379	0.261973	1.19313	0.360038	0.880032	0.46858	0.737585	0.130081	0.60953	0.185505	-	-	B	-			1.92719e+07	14003.8	51560.6	6.44582e+06	1.11077e+07	172.324	156019	105869	129821	130570	25083.7	19.211	183351	630846	295004	369734	232919	62.9964	23203	20056.2	27931.9	23730.4	3964.25	16.7054
pos	DG(34:3p)	DG	34:3p	(34:3p)	574.496	C37H66O4		25.307	+H	0.956609	0.885622	1.4995	0.145895	0.485349	0.0859222	0.323673	0.0251001	0.507363	0.189112	C	C	C	-			2.02335e+07	7.12039e+06	7.86234e+06	1.17387e+07	7.36602e+06	62.7497	7.43303e+06	1.24985e+07	1.75122e+07	1.24812e+07	5.03963e+06	40.3776	1.85858e+07	9.12149e+06	9.96283e+06	1.25567e+07	5.23828e+06	41.717	9.6403e+06	9.21433e+06	2.16901e+07	1.35149e+07	7.08311e+06	52.4096
pos	Cer(d18:0+pO_24:1)	Cer	d18:0+pO_24:1	(d18:0+pO_24:1)	665.632	C42H83O4N1		32.927	+H	0.988445	0.949499	0.983891	0.913406	0.723827	0.053573	0.735679	0.138265	0.732289	0.211757	-	B	B	B			5.16946e+06	8.07449e+06	8.43502e+06	7.22632e+06	1.79039e+06	24.7759	3.04072e+06	5.47712e+06	9.47822e+06	5.99869e+06	3.25029e+06	54.1833	8.08453e+06	7.74296e+06	8.7925e+06	8.20666e+06	535324	6.52305	8.43855e+06	3.65432e+06	5.87047e+06	5.98778e+06	2.39427e+06	39.9859
pos	Cer(d18:1+hO_20:0+O)	Cer	d18:1+hO_20:0+O	(d18:1+hO_20:0+O)	625.564	C38H75O5N1		30.768	+H	0.643242	0.18431	0.844965	0.594282	0.836035	0.493621	0.989432	0.970179	1.29972	0.211819	B	B	B	B			232144	4.91112e+06	8.34934e+06	4.49753e+06	4.07437e+06	90.5912	6.81926e+06	8.8457e+06	2.01356e+07	1.19335e+07	7.17513e+06	60.1258	1.14059e+07	7.83015e+06	1.32102e+07	1.08154e+07	2.73821e+06	25.3177	6.85834e+06	4.39307e+06	2.41627e+07	1.18047e+07	1.07731e+07	91.261
pos	MGDG(16:3_16:3)	MGDG	16:3_16:3	(16:3_16:3)	718.466	C41H66O10		14.136	+Na	0.827813	0.667033	1.64838	0.18505	1.01764	0.963413	0.61736	0.0353962	1.22932	0.211856	A	A	A	A			8.93836e+06	1.65717e+07	2.61378e+07	1.7216e+07	8.61781e+06	50.0571	5.5325e+07	2.37298e+07	3.67736e+07	3.86095e+07	1.58774e+07	41.1231	1.27034e+08	1.8562e+07	4.59007e+07	6.38323e+07	5.64155e+07	88.3808	1.84347e+07	2.74255e+07	5.30696e+07	3.29766e+07	1.79724e+07	54.5003
pos	DGDG(18:3_20:2)	DGDG	18:3_20:2	(18:3_20:2)	966.628	C53H90O15		22.58	+Na	1.06262	0.868409	7.04341	0.197823	3.60143	0.208427	0.511319	0.40251	3.3892	0.215362	A	A	A	-			58546.4	8.6231e+06	6.73581e+06	5.13915e+06	4.49999e+06	87.5628	4.83109e+06	1.09568e+07	7.41034e+06	7.73275e+06	3.07556e+06	39.7732	9.19635e+06	1.10918e+07	9.69255e+06	9.99356e+06	982911	9.83544	7.59529e+06	6.08152e+06	7.6849e+06	7.12057e+06	900959	12.6529
pos	PE(16:0_18:3)	PE	16:0_18:3	(16:0_18:3)	713.5	C39H72O8N1P1		24.108	+H	1.56442	0.158332	1.53835	0.369315	1.1677	0.547542	0.759064	0.500763	0.746413	0.221507	A	A	A	A			2.44392e+07	227.081	728.566	8.1467e+06	1.41097e+07	173.195	1223.01	1439.5	198.062	953.521	663.141	69.5465	4234.98	312.438	339.729	1629.05	2256.85	138.538	2139.15	192.388	2081.45	1471	1107.68	75.3016
pos	PC(38:2)	PC	1.58472	(38:2)	813.625	C46H88O8N1P1		34.618	+H	0.481358	0.393692	1.34964	0.542604	0.227464	0.247572	0.168536	0.00583594	0.472547	0.223473	-	-	-	C			1.26763e+06	1.51511e+06	2.78099e+06	1.85458e+06	811783	43.7719	1.5365e+06	3.00748e+06	3.74948e+06	2.76449e+06	1.12632e+06	40.7425	2.24253e+06	2.27176e+06	2.59052e+06	2.36827e+06	193030	8.15068	2.07321e+06	1.4739e+06	3.11383e+06	2.22031e+06	829802	37.3732
pos	PC(26:0_12:2)	PC	26:0_12:2	(26:0_12:2)	813.625	C46H88O8N1P1		25.251	+H	0.481358	0.393692	1.34964	0.542604	0.227464	0.247572	0.168536	0.00583594	0.472547	0.223473	B	-	-	-			1.26763e+06	8.94822e+06	1.34011e+07	7.87233e+06	6.13789e+06	77.9679	1.43162e+07	8.55471e+06	1.21612e+07	1.16774e+07	2.91107e+06	24.9291	2.03079e+07	2.02456e+07	1.78905e+07	1.94813e+07	1.37807e+06	7.0738	8.81616e+06	1.06487e+07	1.1945e+07	1.04699e+07	1.57206e+06	15.015
pos	TG(13:0_11:2_11:2)	TG	13:0_11:2_11:2	(13:0_11:2_11:2)	616.47	C38H64O6		12.986	+H	1.43856	0.296245	1.13945	0.465608	0.896621	0.482265	0.786887	0.185627	0.623277	0.224921	B	B	-	-			540531	1.38081e+06	2.97529e+06	1.63221e+06	1.23669e+06	75.768	1.09317e+06	7.00805e+06	4.23065e+06	4.11062e+06	2.95926e+06	71.9906	1.57927e+06	3.71796e+06	3.9299e+06	3.07571e+06	1.30028e+06	42.2757	9.76384e+06	5.45578e+06	4.18751e+06	6.46905e+06	2.92299e+06	45.1843
pos	MGDG(18:2_18:3)	MGDG	18:2_18:3	(18:2_18:3)	776.544	C45H76O10		21.13	+Na	1.26103	0.402693	1.61073	0.0165689	0.847525	0.239598	0.526175	0.0090219	0.672089	0.229096	A	A	A	A			1.2948e+07	6.69883e+06	7.18149e+06	8.94276e+06	3.477e+06	38.8806	7.47657e+06	4.76826e+06	9.64305e+06	7.29596e+06	2.44241e+06	33.4762	5.44166e+06	9.60899e+06	8.09802e+06	7.71622e+06	2.10974e+06	27.3416	7.58198e+06	4.58501e+06	7.44849e+06	6.53849e+06	1.69308e+06	25.8941
pos	TG(16:1_18:3_18:3)	TG	16:1_18:3_18:3	(16:1_18:3_18:3)	848.689	C55H92O6		36.463	+NH4	1.01926	0.928246	1.15645	0.18358	1.32266	0.0305429	1.14373	0.150699	1.29767	0.229779	A	A	A	A			1.18765e+07	1.81142e+06	3.71e+06	5.7993e+06	5.34792e+06	92.2167	3.15813e+06	7.04157e+06	5.60421e+06	5.26797e+06	1.96343e+06	37.2712	1.13901e+07	5.21078e+06	6.43723e+06	7.67937e+06	3.27158e+06	42.6021	2.06653e+07	5.91062e+06	9.38066e+06	1.19855e+07	7.71455e+06	64.3655
pos	Cer(d18:1+hO_22:0+O)	Cer	d18:1+hO_22:0+O	(d18:1+hO_22:0+O)	653.596	C40H79O5N1		32.045	+H	0.731355	0.167645	1.01458	0.934204	0.931997	0.676033	0.918605	0.610516	1.27434	0.23086	B	B	B	B			7.55647e+06	7.21582e+06	6.69307e+06	7.15512e+06	434892	6.07805	5.6808e+06	8.09966e+06	3.02946e+06	5.60331e+06	2.53599e+06	45.2588	5.93489e+06	3.78773e+06	1.41204e+07	7.94768e+06	5.45249e+06	68.6048	7.89124e+06	4.69508e+06	4.0885e+06	5.55827e+06	2.04304e+06	36.7568
pos	PE(18:0_18:3)	PE	18:0_18:3	(18:0_18:3)	741.531	C41H76O8N1P1		29.744	+H	1.29843	0.126341	1.27963	0.387896	0.773488	0.548522	0.604464	0.28272	0.595709	0.232234	A	A	A	A			1.34053e+06	237563	327699	635265	612440	96.4071	197513	675066	1.13238e+06	668319	467469	69.947	354216	332442	446357	377671	60471.5	16.0117	406679	240275	707994	451650	237080	52.4921
pos	MGDG(16:0_18:1)	MGDG	16:0_18:1	(16:0_18:1)	756.575	C43H80O10		30.805	+Na	0.980003	0.880762	1.29841	0.0918075	0.813119	0.233072	0.626242	0.0320573	0.82971	0.234377	A	A	A	A			3.21111e+07	1.87006e+06	957181	1.16461e+07	1.77291e+07	152.232	869166	971162	1.48679e+06	1.10904e+06	331095	29.8541	944493	953682	243054	713743	407654	57.115	798537	1.59927e+06	1.28055e+06	1.22612e+06	403134	32.8789
pos	DGDG(16:0_16:3)	DGDG	16:0_16:3	(16:0_16:3)	886.565	C47H82O15		17.794	+Na	1.44794	0.0121519	9.77053	0.196077	20.1274	0.229014	2.06001	0.461535	13.9007	0.23649	A	A	-	-			2187.31	1.46837e+06	1.31058e+06	927047	804829	86.8163	1.14538e+06	647704	1.32033e+06	1.0378e+06	348977	33.6265	1.47706e+06	1.06125e+06	933218	1.15718e+06	284329	24.5709	1.04252e+06	1.02463e+06	1.20293e+06	1.09003e+06	98182.3	9.00734
pos	TG(18:1_18:1_20:4)	TG	18:1_18:1_20:4	(18:1_18:1_20:4)	906.768	C59H102O6		43.511	+H	0.534081	0.0922234	0.525899	0.0873529	0.875495	0.667789	1.66476	0.238354	1.63925	0.241365	A	A	A	A			1.75601e+07	2.92255e+07	1.51965e+07	2.06607e+07	7.51091e+06	36.3536	1.84434e+07	1.28283e+07	1.29008e+07	1.47241e+07	3.22114e+06	21.8766	2.5624e+07	3.44444e+07	2.78896e+07	2.93194e+07	4.58073e+06	15.6235	1.63195e+07	2.02904e+07	1.76919e+07	1.81006e+07	2.01676e+06	11.1419
pos	PS(18:0_16:0)	PS	18:0_16:0	(18:0_16:0)	763.536	C40H78O10N1P1		23.269	+Na	1.71126	0.365671	1.96572	0.461671	2.98704	0.101074	1.51957	0.476126	1.74552	0.246096	-	-	-	A			2.62097e+07	2.01666e+07	2.75356e+07	2.46373e+07	3.92807e+06	15.9436	2.01664e+07	2.68211e+07	6.94339e+07	3.88071e+07	2.67314e+07	68.8828	5.92642e+07	6.43016e+07	8.5556e+07	6.97073e+07	1.39546e+07	20.0189	4.77754e+07	5.29793e+07	6.16692e+07	5.41413e+07	7.01939e+06	12.9649
pos	TG(20:0_20:0_20:0)	TG	20:0_20:0_20:0	(20:0_20:0_20:0)	974.924	C63H122O6		55.365	+NH4	0.306066	0.0302283	0.040253	0.0269455	2.05636	0.433092	51.0858	0.20399	6.71868	0.246675	-	-	-	A			867828	3.12401e+07	2.4086e+07	1.87313e+07	1.58784e+07	84.7692	1.78767e+07	5.10554e+06	1.82926e+07	1.37583e+07	7.49639e+06	54.4863	420573	3.39447e+07	2.89882e+07	2.11178e+07	1.80949e+07	85.6852	42106.8	5143.36	201756	83002.1	104491	125.89
pos	PI(16:1_18:3)	PI	16:1_18:3	(16:1_18:3)	830.495	C43H75O13N0P1		15.946	+NH4	1.02132	0.97237	1.47539	0.461409	1.86754	0.0153779	1.26579	0.531601	1.82856	0.249324	-	A	B	A			3.359e+06	486148	614028	1.48639e+06	1.62298e+06	109.19	627841	488205	569859	561968	70151.4	12.4832	1.57032e+06	771643	1.13892e+06	1.16029e+06	399765	34.4538	495848	486477	2.69823e+06	1.22685e+06	1.27426e+06	103.864
pos	PS(18:0_18:0)	PS	18:0_18:0	(18:0_18:0)	791.568	C42H82O10N1P1		28.867	+Na	1.42555	0.545796	1.67453	0.531546	2.41171	0.074781	1.44023	0.515189	1.69177	0.252846	A	A	A	A			2.4427e+07	1.00758e+07	1.04232e+07	1.49753e+07	8.18721e+06	54.6714	7.23356e+06	1.17033e+07	1.46511e+07	1.1196e+07	3.73468e+06	33.3573	7.05582e+06	1.32368e+07	1.06726e+07	1.03217e+07	3.10537e+06	30.0857	9.32121e+06	7.96443e+06	9.86536e+06	9.05033e+06	978986	10.8171
pos	PC(16:0_22:1)	PC	16:0_22:1	(16:0_22:1)	815.64	C46H90O8N1P1		17.472	+H	0.895201	0.417416	1.09387	0.309419	0.697616	0.102221	0.63775	0.0728456	0.779284	0.253487	-	-	-	B			7.37206e+06	2.14088e+06	1.23628e+06	3.58307e+06	3.31239e+06	92.4454	2.11166e+06	2.23248e+06	3.21337e+06	2.51917e+06	604220	23.9849	2.69329e+06	3.78693e+06	3.11766e+06	3.19929e+06	551370	17.2341	2.75292e+06	2.41829e+06	3.05283e+06	2.74135e+06	317425	11.5792
pos	DGDG(18:3_20:0)	DGDG	18:3_20:0	(18:3_20:0)	970.659	C53H94O15		31.041	+Na	1.22494	0.723319	0.928139	0.895258	0.397482	0.0679092	0.428257	0.368461	0.324491	0.258795	A	A	-	-			7.06743e+06	8.6444e+06	5.82878e+06	7.1802e+06	1.4112e+06	19.654	4.62926e+06	4.00233e+06	7.66343e+06	5.43167e+06	1.95801e+06	36.048	4.96188e+06	7.69898e+06	5.4392e+06	6.03336e+06	1.46209e+06	24.2334	5.47704e+06	5.57019e+06	6.40779e+06	5.81834e+06	512601	8.81009
pos	TG(18:3_12:2_22:5)	TG	18:3_12:2_22:5	(18:3_12:2_22:5)	842.642	C55H86O6		34.134	+Na	0.580466	0.277039	1.57888	0.564757	4.57141	0.297691	2.89536	0.364962	7.87541	0.25926	-	-	A	-			5.13026e+06	3927.28	5741.29	1.71331e+06	2.95916e+06	172.716	5944.59	6951.64	9963.47	7619.9	2091.12	27.4428	6211.47	10233.6	7928.66	8124.59	2018.23	24.8411	4929.75	3972.03	6262.57	5054.78	1150.38	22.7583
pos	PA(18:0_18:2)	PA	18:0_18:2	(18:0_18:2)	700.504	C39H73O8N0P1		57.08	+NH4	0.795413	0.802649	0.763673	0.689007	2.29888	0.304827	3.0103	0.240207	2.89018	0.264632	-	-	-	B			665124	1.94361e+08	2.02625e+08	1.32551e+08	1.14291e+08	86.2243	1.6883e+08	1.77757e+08	2.4576e+08	1.97449e+08	4.20759e+07	21.3097	2.57548e+08	3.3328e+08	2.60491e+08	2.83773e+08	4.28993e+07	15.1175	1.78835e+08	1.63161e+08	2.09059e+08	1.83685e+08	2.33301e+07	12.7011
pos	PE(26:0_18:2)	PE	26:0_18:2	(26:0_18:2)	855.672	C49H94O8N1P1		39.353	+H	1.36424	0.283012	1.50336	0.031081	0.984494	0.928138	0.654864	0.025812	0.721641	0.266509	B	A	A	A			455905	620553	682239	586232	117005	19.9589	876529	777195	1.53482e+06	1.06285e+06	411744	38.7398	944402	1.72028e+06	1.15065e+06	1.27178e+06	401869	31.599	929209	720473	955984	868555	128940	14.8454
pos	DG(16:0_18:2)	DG	16:0_18:2	(16:0_18:2)	592.507	C37H68O5		31.331	+NH4	2.52493	0.0944071	3.68071	0.079847	5.74465	0.151862	1.56074	0.445619	2.27517	0.267659	A	A	A	A			737729	2.70564e+06	2.27203e+06	1.90513e+06	1.03399e+06	54.2737	1.75105e+07	1.89276e+07	4.96337e+06	1.38005e+07	7.6859e+06	55.6929	1.56592e+07	6.77851e+06	1.04732e+07	1.09703e+07	4.46117e+06	40.6658	9.65086e+06	1.77603e+07	1.17949e+07	1.30687e+07	4.20208e+06	32.1539
pos	TG(26:0_16:0_16:0)	TG	26:0_16:0_16:0	(26:0_16:0_16:0)	946.893	C61H118O6		53.416	+NH4	1.07248	0.874798	0.645954	0.473829	1.33957	0.468172	2.07379	0.0682977	1.24904	0.274254	-	B	-	A			499729	1.61062e+07	1.60761e+07	1.0894e+07	9.00174e+06	82.63	7.31392e+06	7.93781e+06	1.11868e+07	8.81283e+06	2.07943e+06	23.5954	1.39575e+07	1.40843e+07	1.56864e+07	1.45761e+07	963629	6.61104	1.45252e+07	1.38072e+07	1.73567e+07	1.52297e+07	1.87669e+06	12.3226
pos	Co(Q9)	Co	Q9	(Q9)	794.621	C54H82O4		36.493	+H	1.33822	0.234429	1.58959	0.0147513	1.02377	0.895533	0.64405	0.0308925	0.765023	0.274587	A	A	-	-		Ubiquinone and other terpenoid-quinone biosynthesis	1.20194e+07	7.52066e+06	1.2117e+07	1.05523e+07	2.62597e+06	24.8852	3.72466e+06	1.99271e+07	3.13494e+07	1.83337e+07	1.38811e+07	75.7136	1.09135e+07	7.85689e+06	1.3124e+07	1.06315e+07	2.64485e+06	24.8776	1.78717e+07	8.42872e+06	2.52776e+07	1.71927e+07	8.44494e+06	49.1194
pos	PI(16:0_18:1)	PI	16:0_18:1	(16:0_18:1)	836.542	C43H81O13N0P1		23.619	+NH4	1.11228	0.692791	1.38195	0.363296	1.45145	0.0373322	1.05029	0.851876	1.30493	0.277583	A	A	A	A			2.10099e+06	560305	717717	1.12634e+06	847734	75.2647	386892	519331	622458	509560	118087	23.1743	1.41569e+06	535121	1.29398e+06	1.0816e+06	477159	44.1161	435877	418426	2.542e+06	1.1321e+06	1.22104e+06	107.856
pos	PS(16:0_18:3)	PS	16:0_18:3	(16:0_18:3)	757.489	C40H72O10N1P1		19.234	+H	1.35717	0.457933	1.35259	0.59772	2.17659	0.141921	1.60921	0.340205	1.60378	0.278156	A	A	A	A			6.07243e+07	1.13405e+06	1.34981e+07	2.51188e+07	3.14488e+07	125.2	1.30221e+06	1.54678e+06	4.79702e+07	1.69397e+07	2.68734e+07	158.642	1.43695e+06	2.28509e+07	3.70028e+07	2.04302e+07	1.7906e+07	87.645	1.47966e+06	1.51296e+06	2.07132e+06	1.68798e+06	332401	19.6922
pos	TG(22:5_12:3_12:3)	TG	22:5_12:3_12:3	(22:5_12:3_12:3)	756.533	C49H72O6		19.625	+Na	0.89527	0.689205	0.805897	0.52123	1.58143	0.342061	1.96233	0.237077	1.76643	0.279794	B	B	B	A			3.59835e+07	0	0	1.19945e+07	2.07751e+07	173.205	0	27067.1	0	9022.37	15627.2	173.205	916486	154296	598.17	357127	490477	137.34	90608.5	37807.9	50696.9	59704.4	27528.7	46.1083
pos	TG(12:0e_10:2_10:3)	TG	12:0e_10:2_10:3	(12:0e_10:2_10:3)	558.428	C35H58O5		10.531	+Na	1.12476	0.854741	1.85993	0.148349	1.99874	0.188684	1.07463	0.820132	1.77704	0.284176	B	B	B	-			1.75883e+08	620490	3.69667e+06	6.00666e+07	1.00311e+08	167	3.31839e+07	994498	795164	1.16579e+07	1.86424e+07	159.913	2.87323e+06	1.57221e+06	4.86288e+06	3.10277e+06	1.6573e+06	53.4135	13458.5	43118.1	14691.2	23755.9	16779.5	70.6329
pos	DG(36:3p)	DG	36:3p	(36:3p)	602.527	C39H70O4		30.895	+H	1.08624	0.699588	1.64633	0.020801	0.858973	0.402438	0.52175	0.00656195	0.790774	0.287197	C	-	C	-			3.58946e+06	5.88485e+07	7.69969e+07	4.64783e+07	3.82352e+07	82.2646	1.00394e+08	6.74543e+07	9.98398e+07	8.92292e+07	1.88597e+07	21.1362	1.2213e+08	1.73857e+08	1.20185e+08	1.38724e+08	3.04418e+07	21.9441	6.88985e+07	8.86149e+07	1.0099e+08	8.61679e+07	1.61852e+07	18.7834
neg	DGMG(23:6)	DGMG	23:06:00	(23:6)	740.398	C38H60O14		23.53	+HCOO	0.286116	0.196118	0.0143776	0.124128	0.0274065	0.126688	1.90619	0.495833	0.0957879	0.287406	B	-	-	-			7.35046e+06	1.19413e+07	5.45873e+07	2.46263e+07	2.60483e+07	105.774	832455	195775	1.89318e+08	6.34489e+07	1.09007e+08	171.802	1.00972e+06	5.51763e+06	2.62484e+08	8.96706e+07	1.49678e+08	166.92	52240.1	1.05383e+08	5.15922e+06	3.68647e+07	5.93932e+07	161.111
pos	TG(24:0_11:1_18:2)	TG	24:0_11:1_18:2	(24:0_11:1_18:2)	870.768	C56H102O6		47.316	+H	0.89834	0.752863	0.599878	0.0323329	1.3	0.19373	2.1671	0.0441561	1.44711	0.290223	-	-	-	A			1.28898e+06	1.27317e+06	765121	1.10909e+06	297992	26.8682	2.11032e+06	5.17824e+06	3.35184e+06	3.5468e+06	1.54323e+06	43.5104	9475.76	9.98185e+06	7.68134e+06	5.89089e+06	5.22172e+06	88.6406	18099.5	14791.9	19521	17470.8	2426.45	13.8886
pos	DG(34:2p)	DG	34:2p	(34:2p)	576.512	C37H68O4		33.634	+Na	0.951417	0.908145	1.66628	0.462509	1.90133	0.304543	1.14106	0.824013	1.99842	0.292938	-	C	-	C			5.37182e+06	1.68673e+07	1.06727e+07	1.09706e+07	5.75351e+06	52.4448	1.50129e+07	1.76466e+07	3.29672e+06	1.19854e+07	7.639e+06	63.7357	1.73151e+07	6.89804e+06	8.02599e+06	1.07464e+07	5.71656e+06	53.1953	1.16489e+07	9.83354e+06	1.15953e+07	1.10259e+07	1.03297e+06	9.3686
neg	PG(34:4)	PG	1_1_1900 10:04:00 AM	(34:4)	742.479	C40H71O10N0P1		43.386	-H	2.51498	0.47311	0.174542	0.0592739	0.0932752	0.04814	0.5344	0.312017	0.0370879	0.295534	C	-	-	-			124914	3.69957e+07	6.88728e+07	3.53311e+07	3.44041e+07	97.3763	8.97194e+07	6.11034e+07	1.51295e+08	1.00706e+08	4.60886e+07	45.7656	6.08823e+07	1.29654e+08	9.4545e+07	9.50272e+07	3.43885e+07	36.1881	6.61624e+07	8.34857e+07	8.22198e+07	7.72893e+07	9.65692e+06	12.4945
pos	PC(20:1_18:2)	PC	20:1_18:2	(20:1_18:2)	811.609	C46H86O8N1P1		33.393	+H	1.32002	0.314047	1.69845	0.0184465	0.969341	0.896043	0.570721	0.0304118	0.734337	0.296314	-	-	-	B			4.18992e+07	3.45229e+07	3.83979e+07	3.82733e+07	3.68972e+06	9.64044	5.2806e+07	3.68199e+07	1.46785e+08	7.88037e+07	5.94139e+07	75.3947	4.57605e+07	9.98467e+07	6.77908e+07	7.11327e+07	2.71975e+07	38.2349	1.45646e+08	1.33802e+08	4.27772e+07	1.07409e+08	5.62848e+07	52.4025
pos	TG(16:0_16:0_18:3)	TG	16:0_16:0_18:3	(16:0_16:0_18:3)	828.721	C53H96O6		43.601	+H	2.37952	0.251945	1.29648	0.397088	1.17328	0.437905	0.904971	0.73114	0.493073	0.296653	A	A	-	A			5.50809e+06	2.93966e+06	6.20583e+06	4.88453e+06	1.72005e+06	35.2143	1.11159e+07	2.70395e+06	1.08613e+07	8.22705e+06	4.78484e+06	58.1598	1.22389e+07	1.27354e+07	8.93633e+06	1.13035e+07	2.06504e+06	18.2689	3.77927e+06	4.23568e+06	6.62342e+06	4.87946e+06	1.52746e+06	31.3038
neg	DGMG(31:8)	DGMG	1_1_1900 7:08:00 AM	(31:8)	848.492	C46H72O14		12.033	-H	2.74033	0.373319	0.433697	0.0778782	0.611418	0.247	1.40978	0.578244	0.223118	0.297807	-	-	-	B			7.31772e+06	5.24085e+07	4.34058e+07	3.43773e+07	2.38627e+07	69.4141	2.86599e+07	9.00297e+07	1.98565e+08	1.05751e+08	8.60366e+07	81.3574	1.01042e+07	8.5515e+07	1.40753e+08	7.87907e+07	6.55833e+07	83.2374	1.10192e+08	2.60477e+08	3.76e+07	1.3609e+08	1.13673e+08	83.528
pos	PG(16:1_18:1)	PG	16:1_18:1	(16:1_18:1)	746.51	C40H75O10N0P1		21.743	+NH4	1.34574	0.208993	1.46879	0.0926469	1.0768	0.519476	0.733118	0.133048	0.80015	0.299115	A	A	A	A			2.40509e+07	5.79335e+06	6.22833e+06	1.20242e+07	1.04177e+07	86.6395	5.11005e+06	7.3922e+06	9.03676e+06	7.17967e+06	1.97197e+06	27.466	5.86123e+06	1.11612e+07	7.14452e+06	8.05565e+06	2.76497e+06	34.3233	6.8058e+06	5.46508e+06	6.37765e+06	6.21618e+06	684793	11.0163
neg	SQMG(37:5)	SQMG	1_1_1900 1:05:00 PM	(37:5)	840.542	C46H80O11S1		30.633	+HCOO	1.26713	0.687084	3.73969	0.0893959	2.28593	0.180604	0.611261	0.267973	1.80402	0.302628	B	-	-	-			3.76357e+06	5.07273e+07	5.2888e+07	3.5793e+07	2.77593e+07	77.5552	5.37069e+07	5.07068e+07	5.28208e+07	5.24115e+07	1.54138e+06	2.94092	6.26451e+07	9.48502e+07	8.10225e+07	7.9506e+07	1.6156e+07	20.3205	5.52216e+07	4.79502e+07	3.8417e+07	4.71963e+07	8.42765e+06	17.8566
pos	TG(16:1p_10:2_10:2)	TG	16:1p_10:2_10:2	(16:1p_10:2_10:2)	612.475	C39H64O5		17.006	+H	1.49491	0.172167	1.79006	0.00395229	1.15864	0.199365	0.647263	0.00054033	0.775056	0.303194	-	B	-	-			1.76325e+08	6.95546e+06	5.99956e+06	6.30933e+07	9.80626e+07	155.425	389103	1.16958e+06	9.27496e+06	3.61121e+06	4.92045e+06	136.255	731578	3.66408e+06	6.00568e+06	3.46711e+06	2.64256e+06	76.218	2.64895e+06	1.12435e+07	1.74187e+07	1.0437e+07	7.41784e+06	71.0722
pos	TG(18:3_14:4_14:4)	TG	18:3_14:4_14:4	(18:3_14:4_14:4)	756.533	C49H72O6		16.149	+Na	1.52455	0.271169	2.40605	0.283265	0.959858	0.916016	0.398935	0.270842	0.629601	0.307303	A	B	A	A			1.38242e+06	5.50656e+06	1.44323e+07	7.10708e+06	6.67052e+06	93.8573	9.76796e+06	2.99228e+06	3.50168e+06	5.42064e+06	3.77349e+06	69.6134	1.17661e+07	1.43963e+06	3.04366e+06	5.41645e+06	5.5571e+06	102.597	7.03834e+06	1.08465e+07	1.38896e+07	1.05915e+07	3.43277e+06	32.4106
pos	TG(18:0_22:0_22:0)	TG	18:0_22:0_22:0	(18:0_22:0_22:0)	1002.96	C65H126O6		52.662	+NH4	0.956931	0.909414	0.898742	0.628611	2.71231	0.319695	3.01789	0.298135	2.83438	0.30925	-	-	-	A			5.40153e+06	614317	3.40537e+06	3.1404e+06	2.40458e+06	76.5691	1.27938e+06	875044	390662	848363	444960	52.4493	2.40788e+06	2.09753e+06	2.63057e+06	2.37866e+06	267718	11.255	423836	389118	389719	400891	19873.1	4.95724
pos	PC(31:5)	PC	1.29514	(31:5)	709.468	C39H68O8N1P1		24.219	+H	1.04149	0.900356	2.31149	0.32347	10.3611	0.318422	4.48243	0.374842	9.9483	0.320063	C	-	-	-			478998	5.57704e+06	1.72554e+06	2.59386e+06	2.65763e+06	102.458	14250.2	159977	745102	306443	386815	126.227	1.51853e+07	422882	447008	5.35174e+06	8.51615e+06	159.129	30441.4	346341	1.52465e+06	633810	787490	124.247
pos	PA(16:0_18:3)	PA	16:0_18:3	(16:0_18:3)	670.457	C37H67O8N0P1		57.172	+NH4	1.13374	0.895859	6.5954	0.432108	36.9423	0.32087	5.60123	0.384759	32.5844	0.322217	A	A	A	A			9.14244e+06	3.50115e+06	492241	4.37861e+06	4.39135e+06	100.291	750975	273753	1.48523e+06	836653	610267	72.9415	523246	828361	315300	555636	258060	46.444	493270	715357	2.24036e+06	1.14966e+06	951077	82.7266
pos	MGDG(16:3_18:3)	MGDG	16:3_18:3	(16:3_18:3)	746.497	C43H70O10		16.149	+Na	1.51432	0.151967	2.13717	0.0255868	1.36545	0.260819	0.638907	0.00670743	0.901694	0.323173	A	A	A	A			5.80894e+08	2.09691e+06	1.80516e+06	1.94932e+08	3.34253e+08	171.472	1.94915e+06	5.44702e+06	1.67011e+07	8.03241e+06	7.7083e+06	95.965	4.48864e+06	2.53538e+06	5.16115e+06	4.06172e+06	1.36395e+06	33.5806	4.688e+06	2.96408e+06	1.00881e+07	5.91341e+06	3.71676e+06	62.8531
pos	TG(18:0_16:0_16:0)	TG	18:0_16:0_16:0	(18:0_16:0_16:0)	834.768	C53H102O6		46.14	+NH4	1.18098	0.489342	0.704114	0.131599	0.922748	0.652308	1.31051	0.14202	0.781341	0.324402	A	A	A	A			7.41792e+06	5.84335e+06	3.52082e+06	5.59403e+06	1.96047e+06	35.0458	1.24534e+07	4.84476e+06	2.82959e+06	6.70926e+06	5.07561e+06	75.6508	9.97787e+06	3.64513e+06	1.62781e+06	5.0836e+06	4.35692e+06	85.7054	1.91525e+06	1.02375e+06	3.59227e+06	2.17709e+06	1.30413e+06	59.9022
pos	PC(19:1_18:3)	PC	19:1_18:3	(19:1_18:3)	795.578	C45H82O8N1P1		24.314	+H	1.21333	0.292765	1.94269	0.0466702	1.47121	0.0993187	0.757305	0.182863	1.21254	0.3254	-	B	-	-			1.17583e+07	4.8799e+08	4.43719e+08	3.14489e+08	2.63105e+08	83.6612	3.75878e+08	4.097e+08	4.85392e+08	4.23657e+08	5.60752e+07	13.236	6.01739e+08	6.72356e+08	5.05469e+08	5.93188e+08	8.37715e+07	14.1223	4.60808e+08	4.20218e+08	4.5438e+08	4.45135e+08	2.18174e+07	4.90129
pos	TG(16:0_18:2_20:5)	TG	16:0_18:2_20:5	(16:0_18:2_20:5)	876.721	C57H96O6		40.378	+H	1.22421	0.602518	0.894097	0.802976	0.817424	0.648136	0.914245	0.842915	0.667714	0.325439	A	A	A	A			1.72217e+06	5.42645e+06	5.09316e+06	4.08059e+06	2.04924e+06	50.2192	1.9848e+06	8.13363e+06	5.11701e+06	5.07848e+06	3.0746e+06	60.5417	6.65833e+06	3.96231e+06	3.68835e+06	4.76966e+06	1.64136e+06	34.4124	2.79312e+07	1.0145e+07	5.1068e+06	1.43943e+07	1.19909e+07	83.3026
pos	MGDG(16:0_16:3)	MGDG	16:0_16:3	(16:0_16:3)	724.513	C41H72O10		20.663	+Na	1.23676	0.0700429	1.70272	0.0034327	1.11179	0.377196	0.652949	0.00848728	0.898955	0.328096	A	A	A	A			3.38597e+08	2.42314e+07	2.75281e+07	1.30119e+08	1.80555e+08	138.761	2.95431e+07	3.11248e+07	5.01963e+07	3.69547e+07	1.14948e+07	31.105	3.82014e+07	5.3727e+07	2.83753e+07	4.01012e+07	1.27822e+07	31.8748	2.95082e+07	3.5461e+07	3.74458e+07	3.41383e+07	4.1308e+06	12.1002
pos	PC(22:1_14:1)	PC	22:1_14:1	(22:1_14:1)	785.593	C44H84O8N1P1		12.458	+H	1.78372	0.580255	3.37308	0.36332	7.30709	0.280963	2.1663	0.47381	4.09655	0.32958	B	-	-	-			0	790846	1.00501e+06	598617	529361	88.4306	946348	1.01086e+06	1.46018e+06	1.13913e+06	279903	24.5717	574933	1.9306e+06	1.09853e+06	1.20135e+06	683658	56.9073	749994	1.17122e+06	1.11189e+06	1.01104e+06	228007	22.5518
pos	SM(d38:3+pO)	SM	d38:3+pO	(d38:3+pO)	770.594	C43H83O7N2P1		39.35	+H	0.833895	0.706544	1.09699	0.646863	0.37745	0.0660696	0.344079	0.00826787	0.452635	0.332626	C	C	C	-			9.88912e+06	5.88302e+08	5.66723e+08	3.88305e+08	3.27895e+08	84.4427	5.74431e+08	5.71046e+08	7.17719e+08	6.21065e+08	8.37213e+07	13.4803	8.19972e+08	1.08539e+09	9.48844e+08	9.51402e+08	1.32727e+08	13.9507	5.47186e+08	5.94576e+08	5.72252e+08	5.71338e+08	2.37082e+07	4.14959
pos	PE(18:0_18:2)	PE	18:0_18:2	(18:0_18:2)	743.547	C41H78O8N1P1		31.57	+H	1.44937	0.229838	1.63505	0.235235	1.78049	0.00938926	1.08895	0.741977	1.22846	0.341389	A	A	A	A			1.85759e+06	3.40586e+07	2.99307e+07	2.1949e+07	1.75216e+07	79.8289	1.72355e+07	3.14098e+07	3.39792e+07	2.75415e+07	9.01721e+06	32.7405	2.18291e+07	4.89365e+07	3.57113e+07	3.54923e+07	1.35551e+07	38.1916	3.43409e+07	3.02252e+07	3.00376e+07	3.15346e+07	2.43218e+06	7.71273
pos	DG(34:6)	DG	(34:6)	(34:6)	584.444	C37H60O5		18.377	+H	1.3414	0.237247	1.81512	0.0172657	1.10738	0.59089	0.610088	0.0126206	0.825546	0.341877	-	-	-	C			6.82539e+07	6.1511e+06	4.62829e+06	2.63444e+07	3.63026e+07	137.8	4.98851e+06	6.28943e+06	3.39442e+06	4.89079e+06	1.44998e+06	29.6471	1.96848e+06	3.86968e+06	4.26133e+06	3.36649e+06	1.22645e+06	36.4312	5.47848e+06	5.47656e+06	4.31015e+06	5.08839e+06	673983	13.2455
pos	TG(18:1_18:1_18:1)	TG	18:1_18:1_18:1	(18:1_18:1_18:1)	884.783	C57H104O6		43.517	+NH4	0.652383	0.182754	0.62151	0.155759	0.882017	0.670872	1.41915	0.296541	1.35199	0.34264	A	A	A	A			2.21e+07	24533.2	41616.4	7.38872e+06	1.27403e+07	172.43	64175.9	26339.6	41988.7	44168.1	19012.1	43.0449	496131	338174	43979.2	292761	229471	78.3816	33470.8	185453	230159	149694	103105	68.8768
pos	MGDG(16:1_18:1)	MGDG	16:1_18:1	(16:1_18:1)	754.559	C43H78O10		27.235	+Na	1.01244	0.943022	1.38469	0.0636608	1.17053	0.254031	0.84534	0.182998	1.15615	0.344678	A	A	A	A			1.15027e+09	1.41241e+07	1.1655e+07	3.92017e+08	6.5667e+08	167.51	1.42494e+07	1.49815e+07	4.25159e+06	1.11608e+07	5.99478e+06	53.7126	1.22951e+07	5.98758e+06	9.62448e+06	9.30239e+06	3.16608e+06	34.0351	5.52562e+06	1.25169e+07	1.05364e+07	9.52632e+06	3.60345e+06	37.8262
pos	MGDG(16:1_18:2)	MGDG	16:1_18:2	(16:1_18:2)	752.544	C43H76O10		23.33	+Na	1.19901	0.569322	1.64522	0.113824	0.878291	0.650812	0.533842	0.0686594	0.732513	0.345983	A	A	A	A			561763	1.18616e+07	1.27656e+07	8.39632e+06	6.79996e+06	80.9874	1.1085e+07	1.43683e+07	7.39386e+06	1.09491e+07	3.48922e+06	31.8677	1.21157e+07	8.70991e+06	8.31194e+06	9.71251e+06	2.0907e+06	21.5259	6.93765e+06	1.1644e+07	1.12341e+07	9.93859e+06	2.60696e+06	26.2307
pos	TG(16:0_8:0_10:3)	TG	16:0_8:0_10:3	(16:0_8:0_10:3)	604.47	C37H64O6		13.442	+H	2.15496	0.386911	0.782012	0.610406	0.880738	0.777347	1.12625	0.709432	0.408704	0.346633	A	A	A	A			236401	1.83051e+07	2.15506e+07	1.3364e+07	1.14841e+07	85.9328	2.2959e+07	2.63567e+07	3.66862e+07	2.86673e+07	7.14933e+06	24.939	2.96452e+07	3.82076e+07	2.60127e+07	3.12885e+07	6.26136e+06	20.0117	2.11242e+07	2.15287e+07	2.61616e+07	2.29382e+07	2.79887e+06	12.2018
pos	SM(d41:8)	SM	d41:8	(d41:8)	786.568	C46H79O6N2P1		39.333	+H	2.11078	0.25429	2.90011	0.0112419	1.2519	0.539768	0.431675	0.0147414	0.593099	0.350152	C	C	C	-			2.5474e+06	167888	380049	1.03178e+06	1.31685e+06	127.629	125239	228697	200436	184791	53474.2	28.9377	571903	137460	342784	350716	217330	61.9676	197057	204867	1.02597e+06	475965	476336	100.078
pos	TG(16:0_16:0_17:0)	TG	16:0_16:0_17:0	(16:0_16:0_17:0)	820.752	C52H100O6		44.462	+NH4	0.796689	0.178973	1.05259	0.902884	1.00022	0.999045	0.950245	0.907851	1.25547	0.353972	A	A	A	A			4.36339e+06	3.88685e+06	4.00887e+06	4.08637e+06	247545	6.05781	2.79672e+06	4.09767e+06	2.87232e+06	3.25557e+06	730259	22.4311	7.40403e+06	2.60014e+06	2.89965e+06	4.30128e+06	2.69124e+06	62.5683	5.29412e+06	3.91374e+06	3.05393e+06	4.08726e+06	1.13013e+06	27.65
pos	Cer(d18:2_28:0+O)	Cer	d18:2_28:0+O	(d18:2_28:0+O)	719.679	C46H89O4N1		35.181	+H	0.976747	0.893167	1.1732	0.525569	0.872893	0.453733	0.744027	0.278191	0.893673	0.355144	-	B	-	B			6.81017e+06	1.97831e+07	5.1865e+07	2.61528e+07	2.3193e+07	88.6826	2.5062e+07	1.96161e+07	1.06614e+07	1.84465e+07	7.27119e+06	39.4177	1.74766e+07	1.14405e+07	8.6732e+06	1.25301e+07	4.50169e+06	35.927	1.33714e+07	2.77252e+07	1.59677e+07	1.90214e+07	7.64866e+06	40.2108
pos	Cer(d18:2_29:0+O)	Cer	d18:2_29:0+O	(d18:2_29:0+O)	733.695	C47H91O4N1		36.087	+H	5.79519	0.234515	6.05205	0.236788	2.36678	0.290381	0.39107	0.349459	0.408404	0.355228	-	-	B	-			338322	2.43346e+07	1.99254e+07	1.48661e+07	1.27731e+07	85.9211	1.78829e+07	1.94983e+07	5.33468e+06	1.42386e+07	7.75322e+06	54.4521	1.94736e+07	9.81325e+06	1.68998e+07	1.53955e+07	5.00274e+06	32.4948	3.57423e+06	2.12917e+07	1.58955e+07	1.35872e+07	9.08151e+06	66.8389
pos	PG(20:1_14:4)	PG	20:1_14:4	(20:1_14:4)	740.463	C40H69O10N0P1		16.374	+NH4	2.19429	0.397897	0.596773	0.248913	0.866327	0.688557	1.45169	0.348951	0.394809	0.356532	B	B	-	B			3.83984e+06	6.25372e+07	6.81074e+07	4.48282e+07	3.5606e+07	79.4278	4.73466e+07	7.73881e+07	7.89082e+07	6.7881e+07	1.77995e+07	26.2217	8.08878e+07	1.0315e+08	7.84275e+07	8.74885e+07	1.36191e+07	15.5668	6.33181e+07	4.95403e+07	6.29163e+07	5.85916e+07	7.84123e+06	13.3829
pos	MGDG(16:2_18:3)	MGDG	16:2_18:3	(16:2_18:3)	748.513	C43H72O10		18.019	+Na	1.28981	0.112398	1.84235	0.00296301	1.0458	0.840313	0.567645	0.0395993	0.810818	0.358075	A	A	A	A			1.25001e+08	386055	234468	4.18738e+07	7.19902e+07	171.922	1.10528e+06	191716	2.74603e+06	1.34768e+06	1.29429e+06	96.0391	4.34771e+06	183681	1.76679e+06	2.09939e+06	2.10185e+06	100.117	1.89119e+06	456800	617177	988390	785951	79.5184
pos	DG(16:0_16:0)	DG	16:0_16:0	(16:0_16:0)	568.507	C35H68O5		24.132	+Na	1.19428	0.437545	1.5259	0.0201388	0.961211	0.807249	0.629932	0.0142934	0.804846	0.35965	A	A	A	A			759108	1.31529e+07	1.95692e+07	1.11604e+07	9.56201e+06	85.6782	1.74017e+07	3.12804e+07	3.459e+07	2.77574e+07	9.1197e+06	32.8551	3.50448e+07	2.32277e+07	3.00438e+07	2.94388e+07	5.93176e+06	20.1495	2.92806e+07	1.52295e+07	4.23013e+07	2.89371e+07	1.35392e+07	46.7882
pos	TG(18:1_18:2_18:1)	TG	18:1_18:2_18:1	(18:1_18:2_18:1)	882.768	C57H102O6		41.95	+NH4	0.837184	0.653902	0.906017	0.750619	1.1864	0.317655	1.30947	0.356511	1.41713	0.359987	A	A	A	A			4.35789e+07	10907.7	6222.14	1.4532e+07	2.51554e+07	173.103	11669.3	34424.9	8136.97	18077.1	14267.4	78.9253	4.12069e+06	7376.34	1.0125e+07	4.75101e+06	5.08816e+06	107.096	2.39114e+06	3.03265e+06	6148.88	1.80998e+06	1.59475e+06	88.1089
pos	Cer(d18:1+hO_28:0+O)	Cer	d18:1+hO_28:0+O	(d18:1+hO_28:0+O)	737.69	C46H91O5N1		36.363	+H	0.846911	0.627994	1.08477	0.750049	1.08755	0.734672	1.00256	0.986653	1.28413	0.363076	B	B	B	B			303044	1.2203e+08	1.59549e+08	9.39605e+07	8.32509e+07	88.602	7.05412e+07	1.40285e+08	1.54634e+08	1.2182e+08	4.49847e+07	36.9272	2.02017e+08	2.50336e+08	7.27516e+07	1.75035e+08	9.18153e+07	52.4555	1.64855e+08	8.66963e+07	1.21016e+08	1.24189e+08	3.91759e+07	31.5453
pos	DGDG(18:3_18:3)	DGDG	18:3_18:3	(18:3_18:3)	936.581	C51H84O15		52.577	+Na	24.7876	0.378684	24.1	0.137316	0.0692463	0.435395	0.00287329	0.130093	0.00279358	0.364106	-	-	B	-			487.609	5.5299e+06	6.20062e+06	3.91034e+06	3.4026e+06	87.0154	9.85365e+06	5.20937e+06	4.19618e+06	6.41973e+06	3.0167e+06	46.991	4.75778e+06	3.20759e+06	4.09886e+06	4.02141e+06	777991	19.3462	6.03701e+06	1.16736e+07	4.17354e+06	7.29471e+06	3.905e+06	53.5319
pos	PC(16:0_18:1)	PC	16:0_18:1	(16:0_18:1)	759.578	C42H82O8N1P1		43.086	+H	1.25812	0.789052	2.40733	0.22369	0.474541	0.475002	0.197123	0.121308	0.377183	0.365704	B	B	B	-			267418	8.45051e+06	6.71563e+06	5.14452e+06	4.31185e+06	83.8144	1.8893e+06	1.02546e+07	3.54987e+06	5.23127e+06	4.42888e+06	84.6618	116325	3.93488e+06	4.39771e+06	2.8163e+06	2.34967e+06	83.4311	6.81376e+06	6.99443e+06	6.16587e+06	6.65802e+06	435681	6.54371
pos	PC(36:6)	PC	1.50417	(36:6)	777.531	C44H76O8N1P1		29.987	+H	1.36564	0.388184	2.0141	0.546866	1.89328	0.187927	0.940013	0.940867	1.38637	0.372321	C	-	-	-			575868	2.1283e+07	1.47952e+07	1.2218e+07	1.05914e+07	86.6867	2.23532e+07	2.34449e+07	5.09067e+06	1.69629e+07	1.02961e+07	60.6979	2.00106e+07	9.37573e+06	1.58151e+07	1.50671e+07	5.35673e+06	35.5524	4.79951e+06	1.96924e+07	1.19401e+07	1.2144e+07	7.44853e+06	61.3351
pos	PC(18:3_18:3)	PC	18:3_18:3	(18:3_18:3)	777.531	C44H76O8N1P1		23.713	+H	1.36564	0.388184	2.0141	0.546866	1.89328	0.187927	0.940013	0.940867	1.38637	0.372321	A	A	A	A			575868	1.07109e+07	1.13533e+07	7.54668e+06	6.04544e+06	80.1073	1.26004e+07	1.12795e+07	1.86256e+07	1.41685e+07	3.91609e+06	27.6394	1.49275e+07	1.74577e+07	1.17052e+07	1.46968e+07	2.88315e+06	19.6175	9.77919e+06	1.35414e+07	1.44562e+07	1.25923e+07	2.47876e+06	19.6848
pos	TG(18:0_18:0_18:1)	TG	18:0_18:0_18:1	(18:0_18:0_18:1)	888.815	C57H108O6		48.301	+NH4	1.11916	0.647435	0.73661	0.255238	0.909944	0.637106	1.23531	0.284196	0.813061	0.374216	A	A	A	A			8.41307e+06	2288.49	2447.42	2.80593e+06	4.85592e+06	173.059	3401.27	3034.94	3588.19	3341.47	281.43	8.42234	3736.85	23531.5	40375.2	22547.8	18339	81.3336	3012.98	92232.9	44100.7	46448.9	44656.3	96.1408
pos	TG(18:2_18:2_18:2)	TG	18:2_18:2_18:2	(18:2_18:2_18:2)	878.736	C57H98O6		39.083	+NH4	1.22451	0.598073	1.38791	0.389895	0.888899	0.822347	0.640461	0.232582	0.725922	0.375453	A	A	A	A			352709	6.8152e+08	7.36097e+08	4.72657e+08	4.09936e+08	86.7303	8.8304e+08	9.4017e+08	1.31632e+09	1.04651e+09	2.35402e+08	22.494	5.61114e+08	1.55431e+09	1.16228e+09	1.09257e+09	5.00255e+08	45.7871	7.6417e+08	7.53551e+08	7.55582e+08	7.57767e+08	5.63701e+06	0.743897
pos	PG(16:1_18:2)	PG	16:1_18:2	(16:1_18:2)	744.494	C40H73O10N0P1		19.398	+NH4	1.19468	0.190589	1.29108	0.479521	1.07873	0.359005	0.83553	0.593506	0.90295	0.377783	A	A	A	A			5.22541e+07	1.61116e+07	2.05955e+07	2.96537e+07	1.97005e+07	66.435	1.86338e+07	1.60543e+07	2.39337e+07	1.95406e+07	4.01721e+06	20.5583	4.84786e+07	2.33745e+07	1.98462e+07	3.05664e+07	1.56124e+07	51.0769	1.35476e+07	1.37038e+07	2.27e+07	1.66505e+07	5.23961e+06	31.4683
pos	PG(16:0_18:3)	PG	16:0_18:3	(16:0_18:3)	744.494	C40H73O10N0P1		57.15	+NH4	1.19468	0.190589	1.29108	0.479521	1.07873	0.359005	0.83553	0.593506	0.90295	0.377783	-	-	B	-			5.22541e+07	2.51861e+07	3.18455e+06	2.68749e+07	2.45783e+07	91.4546	3.38915e+07	3.26512e+07	5.04848e+07	3.90092e+07	9.95751e+06	25.5261	7.85877e+07	7.57123e+07	4.52457e+07	6.65152e+07	1.8476e+07	27.7771	3.13416e+07	3.377e+07	3.75482e+07	3.42199e+07	3.1277e+06	9.13998
pos	Cer(d18:0+pO_26:0+O)	Cer	d18:0+pO_26:0+O	(d18:0+pO_26:0+O)	711.674	C44H89O5N1		35.432	+H	1.04194	0.885461	1.46387	0.293441	1.31368	0.307394	0.8974	0.711235	1.26081	0.378512	B	B	B	B			8.9924e+06	2.73202e+06	4e+06	5.24148e+06	3.30969e+06	63.1442	2.01935e+06	2.88961e+06	3.96258e+06	2.95718e+06	973377	32.9157	5.21932e+06	3.74366e+06	3.39696e+06	4.11998e+06	967710	23.4882	3.15614e+06	1.95262e+06	3.79113e+06	2.96663e+06	933793	31.4766
pos	TG(18:0_16:0_18:3)	TG	18:0_16:0_18:3	(18:0_16:0_18:3)	856.752	C55H100O6		46.094	+H	1.045	0.782299	0.813477	0.234311	0.85287	0.50122	1.04843	0.832305	0.81614	0.381597	A	A	-	A			7.55788e+06	1.13443e+06	643592	3.11197e+06	3.85809e+06	123.976	80269.8	255776	473760	269935	197127	73.0274	32735.4	38718.7	35049.6	35501.2	3017.09	8.49855	3.66386e+06	1.3063e+06	470668	1.81361e+06	1.65594e+06	91.3065
pos	TG(16:0_16:0_24:0)	TG	16:0_16:0_24:0	(16:0_16:0_24:0)	918.861	C59H114O6		51.719	+NH4	2.1413	0.327914	1.60219	0.28347	3.36984	0.10358	2.10327	0.171378	1.57374	0.381673	A	A	-	A			1.40297e+06	78983.9	333488	605148	702556	116.097	67463.5	480721	850107	466097	391527	84.001	140390	123843	243193	169142	64661.8	38.2293	239688	115475	216324	190496	66011.6	34.6525
pos	TG(16:1_8:0_10:3)	TG	16:1_8:0_10:3	(16:1_8:0_10:3)	602.455	C37H62O6		15.695	+Na	1.70971	0.368347	1.07366	0.815722	1.04872	0.893629	0.976764	0.915732	0.61339	0.391117	-	B	-	-			213711	379091	565965	386256	176236	45.6269	541753	500280	869218	637084	202101	31.7228	735589	646807	723747	702048	48204.7	6.86629	464637	366602	547998	459746	90796.8	19.7494
pos	PC(18:2_18:2)	PC	18:2_18:2	(18:2_18:2)	781.562	C44H80O8N1P1		32.621	+H	6.28716	0.458737	1.67335	0.404366	0.0128117	0.190474	0.00765635	0.0844959	0.00203776	0.392742	A	A	A	A			1.24554e+06	1.29542e+06	1.91655e+06	1.48583e+06	373842	25.1604	1.47558e+06	1.63277e+06	2.42007e+06	1.84281e+06	506068	27.4618	1.71592e+06	1.94869e+06	1.46448e+06	1.70969e+06	242167	14.1643	1.20092e+06	1.72761e+06	1.95944e+06	1.62932e+06	388694	23.8562
pos	PC(16:0_20:4)	PC	16:0_20:4	(16:0_20:4)	781.562	C44H80O8N1P1		19.923	+H	6.28716	0.458737	1.67335	0.404366	0.0128117	0.190474	0.00765635	0.0844959	0.00203776	0.392742	-	-	B	-			1.24554e+06	7.33488e+06	5.85587e+06	4.81209e+06	3.17602e+06	66.0008	3.99204e+06	1.00283e+07	9.65882e+06	7.89307e+06	3.38344e+06	42.8659	1.10698e+07	9.99995e+06	1.07843e+07	1.0618e+07	553983	5.21737	1.14691e+07	5.02981e+06	1.20964e+07	9.53175e+06	3.91139e+06	41.0354
pos	TG(16:1_16:1_18:1)	TG	16:1_16:1_18:1	(16:1_16:1_18:1)	828.721	C53H96O6		40.407	+NH4	0.636877	0.392876	0.596995	0.32175	0.872619	0.716215	1.46168	0.202348	1.37015	0.396114	A	A	A	A			3.04807e+07	6.03872e+07	1.03985e+08	6.49511e+07	3.69643e+07	56.9109	6.37636e+07	8.52577e+07	1.56473e+08	1.01831e+08	4.8526e+07	47.6533	2.60757e+07	1.69208e+08	1.09179e+08	1.01488e+08	7.18754e+07	70.8218	1.89215e+08	2.14569e+08	8.61604e+07	1.63315e+08	6.80096e+07	41.6433
pos	DG(18:3_18:3)	DG	18:3_18:3	(18:3_18:3)	612.475	C39H64O5		22.742	+Na	1.14635	0.388391	1.73896	0.0470106	1.03228	0.859907	0.593619	0.054196	0.900494	0.396327	A	A	A	A			3.35462e+07	5.77301e+07	7.06661e+07	5.39808e+07	1.88418e+07	34.9047	5.15205e+07	7.29525e+07	1.22965e+08	8.24793e+07	3.66627e+07	44.4508	1.24917e+08	1.22196e+08	1.35649e+08	1.27587e+08	7.11319e+06	5.57516	7.86956e+07	7.78238e+07	1.0301e+08	8.65097e+07	1.42961e+07	16.5254
pos	DGDG(17:0_18:3)	DGDG	17:0_18:3	(17:0_18:3)	928.612	C50H88O15		23.615	+Na	0.9045	0.334016	0.750942	0.585571	0.789072	0.165221	1.05078	0.931502	0.872384	0.398498	A	A	A	A			2.36911e+07	4.94884e+06	4.84205e+06	1.11607e+07	1.08518e+07	97.2326	1.14821e+07	5.12853e+06	1.89622e+07	1.18576e+07	6.92447e+06	58.3969	3.90779e+06	7.99912e+06	1.20767e+07	7.99454e+06	4.08447e+06	51.0907	1.52193e+07	5.18704e+06	1.09208e+07	1.04424e+07	5.03323e+06	48.2
pos	PA(16:0_18:2)	PA	16:0_18:2	(16:0_18:2)	672.473	C37H69O8N0P1		56.303	+NH4	3.05142	0.178831	1.89296	0.470037	5.69944	0.194459	3.01086	0.256995	1.8678	0.39958	A	A	A	A			1.00373e+08	1.24287e+08	2.32298e+08	1.52319e+08	7.0288e+07	46.1453	1.62401e+08	3.34534e+08	5.81356e+08	3.5943e+08	2.10584e+08	58.5882	3.13445e+08	2.37569e+08	2.81155e+08	2.7739e+08	3.8078e+07	13.7273	2.63518e+08	1.48324e+08	4.51573e+08	2.87805e+08	1.53076e+08	53.1876
pos	TG(16:0_17:1_20:4)	TG	16:0_17:1_20:4	(16:0_17:1_20:4)	866.736	C56H98O6		42.834	+H	0.601999	0.225792	0.562488	0.151013	0.814664	0.479294	1.44832	0.159095	1.35326	0.400493	A	-	-	-			6.80654e+06	4.02911e+08	4.28613e+08	2.79443e+08	2.3646e+08	84.6182	5.09662e+08	4.29567e+08	5.07926e+08	4.82385e+08	4.575e+07	9.48412	6.87671e+08	7.05782e+08	5.98936e+08	6.64129e+08	5.7181e+07	8.60991	4.76101e+08	3.65461e+08	4.59366e+08	4.33643e+08	5.96371e+07	13.7526
pos	DGDG(18:0_18:1)	DGDG	18:0_18:1	(18:0_18:1)	946.659	C51H94O15		31.242	+Na	0.829382	0.691354	1.57409	0.446241	2.13624	0.458169	1.35713	0.708318	2.5757	0.400769	-	-	A	-			120480	3.42909e+06	5.2512e+06	2.93359e+06	2.601e+06	88.6628	3.70634e+06	5.13886e+06	8.79829e+06	5.88116e+06	2.62588e+06	44.649	3.2176e+06	4.2195e+06	3.2454e+06	3.56083e+06	570592	16.0241	4.38343e+06	7.94725e+06	3.53202e+06	5.28757e+06	2.34236e+06	44.2995
pos	Cer(d18:1+hO_25:0)	Cer	d18:1+hO_25:0	(d18:1+hO_25:0)	679.648	C43H85O4N1		34.648	+H	0.978099	0.935384	0.664354	0.43467	0.773558	0.290455	1.16438	0.775194	0.79088	0.407833	B	-	-	B			8.19163e+06	5.95243e+06	5.36049e+06	6.50152e+06	1.49331e+06	22.9686	4.3808e+06	4.57585e+06	1.17059e+06	3.37574e+06	1.91221e+06	56.6456	3.31242e+06	3.1359e+06	3.47319e+06	3.30717e+06	168706	5.1012	2.8337e+06	4.38908e+06	3.03559e+06	3.41946e+06	845765	24.7339
pos	MGDG(18:3_18:3)	MGDG	18:3_18:3	(18:3_18:3)	774.528	C45H74O10		22.977	+H	1.14796	0.263314	1.75855	0.0185735	1.05605	0.5075	0.600522	0.0348494	0.919932	0.414043	B	A	A	A			4.68024e+08	2.24347e+07	1.72809e+07	1.69247e+08	2.58762e+08	152.89	2.16652e+07	2.49452e+07	8.13961e+06	1.825e+07	8.90811e+06	48.8116	2.23135e+07	1.07817e+07	1.49626e+07	1.60193e+07	5.8381e+06	36.4442	1.55109e+07	1.65726e+07	1.52589e+07	1.57808e+07	697205	4.41806
pos	DG(18:3_16:1)	DG	18:3_16:1	(18:3_16:1)	588.475	C37H64O5		20.292	+H	1.16741	0.52844	1.56257	0.104505	1.01838	0.932508	0.651736	0.100121	0.872341	0.417605	A	B	A	A			2.3295e+06	3.33992e+07	5.08847e+07	2.88711e+07	2.45923e+07	85.1794	4.44481e+07	4.13305e+07	6.64228e+07	5.07338e+07	1.36762e+07	26.9567	7.78103e+07	5.23195e+07	6.17804e+07	6.39701e+07	1.28857e+07	20.1433	3.37244e+07	3.33149e+07	9.64508e+07	5.44967e+07	3.63339e+07	66.6717
pos	TG(18:1_18:2_20:5)	TG	18:1_18:2_20:5	(18:1_18:2_20:5)	902.736	C59H98O6		40.403	+H	0.856374	0.78797	1.19549	0.737445	1.63438	0.526486	1.36712	0.636047	1.90849	0.419657	B	A	A	A			1.35004e+07	3.29924e+07	1.86719e+07	2.17215e+07	1.00975e+07	46.4862	1.81264e+07	2.02994e+07	2.95167e+07	2.26475e+07	6.04731e+06	26.7019	2.57533e+07	3.43877e+07	2.61384e+07	2.87598e+07	4.87767e+06	16.96	3.42037e+07	2.79445e+07	2.68012e+07	2.96498e+07	3.98502e+06	13.4403
pos	Cer(d35:0)	Cer	d35:0	(d35:0)	553.543	C35H71O3N1		31.87	+H	0.831717	0.901285	0.926435	0.95862	0.0174747	0.421584	0.0188623	0.419806	0.0210104	0.420543	C	C	C	-			1.37841e+06	7.49717e+07	1.15787e+08	6.40458e+07	5.79818e+07	90.5317	7.6902e+07	9.31285e+07	1.4956e+08	1.0653e+08	3.81378e+07	35.8001	1.42956e+08	1.02631e+08	1.11864e+08	1.1915e+08	2.11272e+07	17.7315	1.10244e+08	8.97637e+07	1.26938e+08	1.08982e+08	1.86191e+07	17.0846
pos	Cer(d33:0)	Cer	d33:0	(d33:0)	525.512	C33H67O3N1		27.91	+H	0.94693	0.970454	1.13501	0.931567	0.0241763	0.424744	0.0213005	0.419746	0.0255312	0.422344	C	C	C	-			732413	5.21166e+06	5.78656e+06	3.91021e+06	2.76703e+06	70.7641	5.4536e+06	6.28489e+06	8.62445e+06	6.78765e+06	1.64412e+06	24.2223	7.62297e+06	8.51009e+06	8.07057e+06	8.06788e+06	443563	5.49789	6.31069e+06	5.39975e+06	8.28223e+06	6.66422e+06	1.4734e+06	22.1091
pos	TG(18:4_16:0_23:0)	TG	18:4_16:0_23:0	(18:4_16:0_23:0)	924.815	C60H108O6		14.013	+Na	#DIV_0!	#DIV_0!	#DIV_0!	#DIV_0!	#DIV_0!	0.42265	#DIV_0!	0.42265	#DIV_0!	0.42265	-	-	-	A			0	1.12939e+06	1.04447e+06	724623	628977	86.8005	730653	1.06632e+06	1.25416e+06	1.01704e+06	265207	26.0763	658451	1.25572e+06	1.10551e+06	1.00656e+06	310686	30.8661	605813	424559	764169	598181	169934	28.4084
pos	TG(18:3_10:2_23:0)	TG	18:3_10:2_23:0	(18:3_10:2_23:0)	838.705	C54H94O6		14.091	+NH4	#DIV_0!	#DIV_0!	#DIV_0!	#DIV_0!	#DIV_0!	0.42265	#DIV_0!	0.42265	#DIV_0!	0.42265	-	-	-	B			0	2.09135e+06	2.39889e+06	1.49675e+06	1.30531e+06	87.2098	1.51789e+06	2.26537e+06	3.87401e+06	2.55242e+06	1.20401e+06	47.1711	1.65988e+06	2.0818e+06	221218	1.32097e+06	975496	73.847	1.30328e+06	790681	1.03443e+06	1.0428e+06	256401	24.5878
pos	TG(16:1_14:4_22:6)	TG	16:1_14:4_22:6	(16:1_14:4_22:6)	840.627	C55H84O6		27.848	+Na	2.64078	0.501754	6.42443	0.224717	0.633401	0.598608	0.0985926	0.204637	0.239854	0.423674	-	-	-	B			269736	4.73328e+06	3.07419e+06	2.6924e+06	2.25613e+06	83.7962	7.08989e+06	1.8245e+06	3.62461e+06	4.17967e+06	2.67622e+06	64.0294	1.3612e+07	5.46454e+06	2.88394e+06	7.32015e+06	5.59956e+06	76.4952	1.25411e+07	9.74615e+06	2.77093e+06	8.35274e+06	5.03194e+06	60.243
pos	TG(15:0_16:0_24:0)	TG	15:0_16:0_24:0	(15:0_16:0_24:0)	904.846	C58H112O6		50.764	+NH4	1.13656	0.441924	0.711291	0.0316427	1.43796	0.271004	2.02162	0.124292	1.26518	0.424079	A	A	-	A			3.7059e+06	391.705	33891	1.24673e+06	2.12977e+06	170.829	45396.6	37474.6	779002	287291	425853	148.23	122170	495311	220482	279321	193404	69.2407	400.979	659.381	1347.35	802.571	489.166	60.9499
pos	DG(32:3e)	DG	32:3e	(32:3e)	548.481	C35H64O4		21.355	+Na	1.24487	0.438668	1.14767	0.580696	1.0063	0.970046	0.876822	0.558326	0.808356	0.426662	-	C	-	C			6.48208e+06	1.15859e+07	9.35505e+06	9.141e+06	2.55862e+06	27.9906	1.1104e+07	1.29292e+07	2.78721e+06	8.94014e+06	5.40617e+06	60.4708	1.03806e+07	4.49796e+06	7.49442e+06	7.45765e+06	2.94148e+06	39.4424	3.30033e+06	1.07277e+07	1.04855e+07	8.17118e+06	4.22002e+06	51.6452
pos	DG(32:2p)	DG	32:2p	(32:2p)	548.481	C35H64O4		18.108	+Na	1.24487	0.438668	1.14767	0.580696	1.0063	0.970046	0.876822	0.558326	0.808356	0.426662	C	-	-	-			6.48208e+06	1.5417e+07	9.02463e+06	1.03079e+07	4.6036e+06	44.6609	1.11941e+07	1.57117e+07	2.38415e+06	9.76333e+06	6.778e+06	69.4231	1.45469e+07	4.35613e+06	9.3379e+06	9.41365e+06	5.09581e+06	54.1322	1.09677e+07	1.22605e+07	8.5203e+06	1.05828e+07	1.89958e+06	17.9496
neg	DGMG(18:0)	DGMG	18:00:00	(18:0)	682.414	C33H62O14		13.843	-H	1.35402	0.586612	2.43215	0.0178395	1.88904	0.0207797	0.776695	0.184318	1.39514	0.427276	-	B	-	B			3.828e+07	634686	675981	1.31969e+07	2.17226e+07	164.604	1.39169e+07	4.94972e+06	254682	6.37376e+06	6.94152e+06	108.908	9.03739e+06	761256	369756	3.38947e+06	4.89516e+06	144.423	3.51094e+06	9.01843e+06	1.93599e+06	4.82179e+06	3.71873e+06	77.1235
pos	Cer(d18:1+hO_27:0+O)	Cer	d18:1+hO_27:0+O	(d18:1+hO_27:0+O)	723.674	C45H89O5N1		35.558	+H	0.847079	0.627413	1.09205	0.778767	1.09135	0.748858	0.999364	0.998219	1.28837	0.427717	B	B	B	B			8.62025e+06	1.65336e+07	2.54762e+07	1.68767e+07	8.43322e+06	49.9696	137822	2.15706e+07	3.41394e+07	1.86159e+07	1.71923e+07	92.3524	1.2608e+08	1.66498e+07	734808	4.78217e+07	6.82396e+07	142.696	1.8363e+07	2.03762e+07	1.86193e+07	1.91195e+07	1.09586e+06	5.73164
pos	PA(18:3_18:3)	PA	18:3_18:3	(18:3_18:3)	692.442	C39H65O8N0P1		35.507	+NH4	1.79114	0.403497	0.537187	0.332248	4.56117	0.330146	8.49084	0.285937	2.54652	0.428149	-	-	-	A			124347	611768	1.58845e+06	774855	745553	96.2183	1.0707e+06	867118	1.32913e+06	1.08898e+06	231549	21.2629	1.90612e+06	1.33857e+06	1.57196e+06	1.60555e+06	285266	17.7675	998508	1.21587e+06	1.30421e+06	1.17286e+06	157323	13.4136
pos	PE(18:3_18:2)	PE	18:3_18:2	(18:3_18:2)	737.5	C41H72O8N1P1		21.055	+H	3.29485	0.530675	3.97377	0.27537	0.32832	0.495634	0.0826219	0.211489	0.0996463	0.429248	A	A	A	A			791607	870509	904312	855476	57837	6.7608	475345	827474	973016	758612	255882	33.7303	560781	1.21657e+06	890731	889360	327897	36.8688	714351	602794	611334	642827	62089.3	9.65879
pos	TG(16:0_8:0_10:2)	TG	16:0_8:0_10:2	(16:0_8:0_10:2)	606.486	C37H66O6		19.93	+Na	1.74489	0.626236	4.31149	0.253668	0.508385	0.454414	0.117914	0.211529	0.291356	0.430598	B	B	-	-			2.08168e+06	5.64012e+06	3.43096e+06	3.71759e+06	1.79646e+06	48.3232	2.66739e+06	3.38004e+06	1.02157e+07	5.42105e+06	4.16757e+06	76.8774	8.33846e+06	2.07234e+07	1.89358e+07	1.59992e+07	6.69433e+06	41.8417	1.51291e+07	5.79658e+06	8.41336e+06	9.77969e+06	4.81397e+06	49.2241
pos	DG(18:4_16:1)	DG	18:4_16:1	(18:4_16:1)	586.46	C37H62O5		18.073	+H	1.28714	0.248763	1.71471	0.0276907	1.10696	0.653524	0.645567	0.0404467	0.86002	0.432659	B	B	C	C			5.27973e+06	8.24978e+06	7.1058e+06	6.87844e+06	1.49803e+06	21.7786	6.69634e+06	1.02659e+07	3.05451e+06	6.67223e+06	3.60573e+06	54.0408	5.71835e+06	5.03943e+06	5.77939e+06	5.51239e+06	410728	7.45099	7.4087e+06	7.97885e+06	5.81268e+06	7.06674e+06	1.12284e+06	15.889
pos	TG(18:0_16:0_18:0)	TG	18:0_16:0_18:0	(18:0_16:0_18:0)	862.799	C55H106O6		48.497	+NH4	1.42407	0.212607	0.810759	0.396442	1.17698	0.515308	1.4517	0.163375	0.826489	0.435239	A	A	A	A			7.38308e+06	2.89726e+07	5.37905e+07	3.00487e+07	2.32224e+07	77.2826	2.47702e+07	3.7315e+07	9.07199e+07	5.09351e+07	3.5021e+07	68.7561	97375.5	1.08127e+08	7.12685e+07	5.9831e+07	5.49155e+07	91.7844	8.45774e+07	1.15915e+08	5.80184e+07	8.61703e+07	2.89813e+07	33.6325
pos	PS(20:0_18:3)	PS	20:0_18:3	(20:0_18:3)	813.552	C44H80O10N1P1		28.849	+H	1.06785	0.791107	0.87694	0.507031	0.865713	0.526131	0.987198	0.947221	0.810708	0.439975	A	A	A	A			1.57824e+06	30048.1	366033	658108	814376	123.745	1.47353e+06	203664	81083.2	586093	770985	131.546	2.45273e+06	1.73006e+06	94703.8	1.42583e+06	1.20809e+06	84.729	43648.1	343790	34291.4	140577	176050	125.235
pos	PE(18:0_16:0)	PE	18:0_16:0	(18:0_16:0)	719.547	C39H78O8N1P1		29.967	+Na	1.56552	0.138356	1.60182	0.200116	1.33484	0.011088	0.833328	0.495562	0.852647	0.441598	-	C	-	B			8.57475e+07	9.41236e+06	1.22514e+07	3.58038e+07	4.32759e+07	120.87	1.33398e+07	8.70612e+06	9.82115e+06	1.06224e+07	2.41852e+06	22.7682	8.00889e+06	5.55708e+06	5.8577e+06	6.47456e+06	1.33725e+06	20.6538	5.92415e+06	1.33637e+07	6.83903e+06	8.70897e+06	4.057e+06	46.5842
pos	Cer(d18:2_29:6)	Cer	d18:2_29:6	(d18:2_29:6)	705.606	C47H79O3N1		34.038	+H	12.1562	0.455307	14.5943	0.448217	0.646098	0.781238	0.0442707	0.43827	0.0531495	0.443203	-	-	-	B			4595.61	7.8752e+06	5.61244e+06	4.49741e+06	4.05205e+06	90.0973	5.36823e+06	3.19602e+06	3.5249e+06	4.02971e+06	1.17079e+06	29.0539	4.7574e+06	3.06736e+06	4.57096e+06	4.13191e+06	926624	22.4261	1.42075e+06	5.72761e+06	4.51778e+06	3.88872e+06	2.22127e+06	57.121
pos	DGDG(18:1_18:3)	DGDG	18:1_18:3	(18:1_18:3)	940.612	C51H88O15		21.654	+Na	1.17197	0.28977	1.65246	0.0262403	1.00507	0.97984	0.608228	0.0414602	0.85759	0.444332	A	A	A	A			2.37477e+06	7.34046e+07	6.51413e+07	4.69736e+07	3.8844e+07	82.6934	4.27774e+07	6.9727e+07	1.06626e+08	7.30435e+07	3.20534e+07	43.8825	4.59497e+07	9.94314e+07	8.69927e+07	7.74579e+07	2.79867e+07	36.1315	7.4123e+07	8.71082e+07	7.60633e+07	7.90982e+07	7.00439e+06	8.85531
pos	PS(16:0_22:0)	PS	16:0_22:0	(16:0_22:0)	819.599	C44H86O10N1P1		34.769	+Na	3.01574	0.49187	7.15676	0.216001	0.745278	0.733492	0.104136	0.203213	0.24713	0.446569	-	-	B	B			308061	366491	194214	289588	87611.3	30.2537	75964.6	618045	533010	409007	291540	71.28	17346.6	235356	115298	122667	109192	89.0146	2.21022e+06	900757	13653.8	1.04155e+06	1.10503e+06	106.096
pos	Cer(d18:1_16:0+O)	Cer	d18:1_16:0+O	(d18:1_16:0+O)	553.507	C34H67O4N1		24.33	+H	1.05859	0.787829	1.30489	0.113856	0.904968	0.537058	0.69352	0.00934149	0.854884	0.45264	B	B	-	-			8.6673e+07	2.5853e+06	2.57381e+06	3.06107e+07	4.85514e+07	158.609	1.85333e+06	2.19477e+06	4.01418e+06	2.68743e+06	1.16162e+06	43.2241	1.59178e+06	4.03786e+06	3.03774e+06	2.88913e+06	1.22979e+06	42.5663	2.67959e+06	2.70625e+06	2.64852e+06	2.67812e+06	28892.3	1.07883
pos	Cer(d18:1+hO_28:0)	Cer	d18:1+hO_28:0	(d18:1+hO_28:0)	721.695	C46H91O4N1		37.114	+H	0.963586	0.905978	1.07542	0.791984	1.17296	0.514595	1.0907	0.685481	1.21729	0.455309	B	B	B	B			717215	226506	483725	475815	245450	51.5851	170512	562721	772718	501984	305663	60.8909	479439	402174	384242	421952	50586.5	11.9887	634418	352427	560296	515714	146186	28.3464
pos	DG(18:1_18:0)	DG	18:1_18:0	(18:1_18:0)	622.554	C39H74O5		33.604	+NH4	0.768856	0.351038	1.06878	0.746693	0.590224	0.0122222	0.552242	0.103453	0.767665	0.456183	A	A	A	B			6.8213e+06	875249	1.00987e+06	2.90214e+06	3.39476e+06	116.974	1.0044e+06	1.05416e+06	1.18204e+06	1.0802e+06	91636.2	8.48327	722899	1.48094e+06	1.54234e+06	1.24872e+06	456411	36.5502	1.11838e+06	891468	1.18302e+06	1.06429e+06	153119	14.3869
pos	DG(30:0e)	DG	30:0e	(30:0e)	526.496	C33H66O4		23.148	+Na	1.14777	0.644315	1.15532	0.624664	0.925382	0.69749	0.800977	0.439905	0.80624	0.458267	C	C	C	C			1.88464e+06	1.14557e+07	8.24699e+06	7.19577e+06	4.87134e+06	67.6973	7.15843e+06	7.07975e+06	2.6284e+06	5.62219e+06	2.593e+06	46.1207	8.95789e+06	3.87956e+06	6.69691e+06	6.51145e+06	2.54424e+06	39.0733	4.43226e+06	5.40028e+06	6.11205e+06	5.31486e+06	843143	15.8639
pos	MGDG(16:4_18:3)	MGDG	16:4_18:3	(16:4_18:3)	744.481	C43H68O10		14.91	+Na	1.11289	0.472064	2.29777	0.0969719	2.42958	0.430049	1.05736	0.937914	2.18313	0.461601	A	B	A	A			414718	1.2012e+07	1.33534e+07	8.59339e+06	7.11462e+06	82.7918	4.44506e+06	2.44586e+07	3.5231e+07	2.13782e+07	1.56224e+07	73.0764	1.55549e+07	1.00357e+07	1.40212e+07	1.32039e+07	2.84894e+06	21.5765	1.14191e+07	7.08744e+06	3.10124e+07	1.65063e+07	1.2748e+07	77.2309
pos	DGDG(16:2_18:3)	DGDG	16:2_18:3	(16:2_18:3)	910.565	C49H82O15		16.406	+Na	1.32574	0.576503	1.93718	0.0997896	0.94083	0.891501	0.48567	0.0200243	0.709664	0.46181	A	A	A	A			1.90374e+07	3.50877e+06	3.42371e+06	8.65662e+06	8.99011e+06	103.852	2.25802e+06	4.54673e+06	5.61159e+06	4.13878e+06	1.7136e+06	41.4035	3.34648e+06	5.52599e+06	4.58606e+06	4.48618e+06	1.09318e+06	24.3678	4.04093e+06	3.54238e+06	3.9523e+06	3.8452e+06	265973	6.91702
pos	TG(16:0_18:3_20:5)	TG	16:0_18:3_20:5	(16:0_18:3_20:5)	874.705	C57H94O6		39.155	+H	1.13478	0.651673	1.09683	0.545179	0.851667	0.623109	0.776481	0.439898	0.750511	0.465289	A	A	A	A			2.48315e+06	1.78316e+08	2.27229e+08	1.36009e+08	1.18195e+08	86.902	2.61256e+08	2.25628e+08	3.82962e+08	2.89949e+08	8.24978e+07	28.4526	3.45538e+08	3.62567e+08	3.3348e+08	3.47195e+08	1.46141e+07	4.20918	2.36957e+08	2.07926e+08	2.29297e+08	2.24727e+08	1.50455e+07	6.69502
pos	DG(18:4_18:3)	DG	18:4_18:3	(18:4_18:3)	610.46	C39H62O5		12.806	+H	0.934056	0.788793	1.98263	0.181882	2.07521	0.493822	1.04669	0.951595	2.22172	0.470653	A	A	A	C			358583	1.21724e+06	1.876e+06	1.15061e+06	760900	66.1302	1.73271e+06	1.31726e+06	1.73705e+06	1.59567e+06	241125	15.1112	2.75009e+06	1.54654e+06	3.19295e+06	2.49653e+06	851988	34.1269	1.00287e+06	1.30663e+06	2.25189e+06	1.52046e+06	651389	42.8416
pos	TG(16:0_18:1_16:0)	TG	16:0_18:1_16:0	(16:0_18:1_16:0)	832.752	C53H100O6		43.768	+NH4	0.884856	0.510984	0.610966	0.00803503	0.742723	0.1285	1.21565	0.359378	0.839372	0.472298	A	A	A	A			3.02244e+07	719310	2.23689e+06	1.10602e+07	1.6614e+07	150.214	1.7815e+06	1.23631e+06	2.70951e+06	1.90911e+06	744841	39.0151	2.23873e+06	1.11663e+06	827563	1.39431e+06	745435	53.4628	606010	1.86508e+06	1.35312e+06	1.27474e+06	633186	49.6719
pos	PE(24:0_18:3)	PE	24:0_18:3	(24:0_18:3)	825.625	C47H88O8N1P1		34.773	+H	1.60605	0.29326	1.51549	0.257801	1.23261	0.397672	0.813339	0.469553	0.767475	0.473458	A	A	A	A			8.22435e+07	1.17578e+07	1.19519e+07	3.53177e+07	4.0639e+07	115.067	1.09386e+07	1.30821e+07	2.44653e+07	1.6162e+07	7.27032e+06	44.9841	5.75776e+06	2.02371e+07	1.52888e+07	1.37612e+07	7.35955e+06	53.4803	1.30965e+07	1.36904e+07	1.16009e+07	1.27959e+07	1.07671e+06	8.41449
pos	PG(18:0_16:1)	PG	18:0_16:1	(18:0_16:1)	748.525	C40H77O10N0P1		28.388	+NH4	1.09556	0.632264	1.41202	0.064617	0.945635	0.597503	0.669706	0.0457358	0.863152	0.473791	A	A	A	A			5.52354e+07	788708	648943	1.8891e+07	3.14753e+07	166.615	532755	755047	659053	648952	111489	17.1799	957160	738679	646171	780670	159690	20.4555	609042	512156	649228	590142	70463.4	11.9401
pos	PE(16:0_24:0)	PE	16:0_24:0	(16:0_24:0)	803.64	C45H90O8N1P1		34.795	+Na	1.97654	0.190934	1.87297	0.141807	1.52336	0.0879872	0.813339	0.469553	0.770721	0.474693	B	B	B	B			4.63398e+07	1.59578e+07	1.84459e+07	2.69145e+07	1.68687e+07	62.6753	9.47391e+06	1.77265e+07	2.08848e+07	1.60284e+07	5.89194e+06	36.7593	1.39874e+07	1.88583e+07	1.61828e+07	1.63428e+07	2.43935e+06	14.9261	1.19847e+07	1.16037e+07	1.64999e+07	1.33628e+07	2.7235e+06	20.3813
pos	PI(18:2_18:2)	PI	18:2_18:2	(18:2_18:2)	858.526	C45H79O13N0P1		18.229	+NH4	1.17403	0.45321	1.45451	0.157333	1.32932	0.0631084	0.913932	0.621911	1.13227	0.477574	A	A	A	A			5.36416e+07	1.13212e+06	1.48052e+06	1.87514e+07	3.02163e+07	161.141	682859	1.03592e+06	1.48982e+06	1.06953e+06	404529	37.823	880980	1.56152e+06	1.13848e+06	1.19366e+06	343612	28.7864	1.59356e+06	1.12381e+06	1.18842e+06	1.30193e+06	254617	19.5569
pos	Cer(d18:0+pO_26:0)	Cer	d18:0+pO_26:0	(d18:0+pO_26:0)	695.679	C44H89O4N1		36.103	+H	0.884923	0.532547	1.23216	0.270458	0.984291	0.934561	0.798832	0.163615	1.11229	0.480077	B	B	B	B			1.88918e+06	1.37271e+07	1.6577e+07	1.07311e+07	7.78877e+06	72.5814	1.4598e+07	1.79211e+07	2.7778e+07	2.0099e+07	6.85459e+06	34.1041	2.88624e+07	2.79142e+07	3.09117e+07	2.92294e+07	1.53211e+06	5.24167	1.89062e+07	1.72937e+07	2.42029e+07	2.01343e+07	3.61459e+06	17.9524
pos	PS(22:0_18:3)	PS	22:0_18:3	(22:0_18:3)	841.583	C46H84O10N1P1		32.759	+H	1.21829	0.642047	0.835189	0.788437	2.11082	0.389806	2.52735	0.347899	1.7326	0.482703	-	-	A	A			2.84734e+07	0	0	9.49112e+06	1.64391e+07	173.205	0	0	0	0	0	#DIV/0!	0	0	0	0	0	#DIV/0!	20041.7	0	0	6680.56	11571.1	173.205
pos	TG(18:3_20:3_20:5)	TG	18:3_20:3_20:5	(18:3_20:3_20:5)	924.721	C61H96O6		38.109	+H	1.22577	0.405366	1.25262	0.00912332	1.46744	0.173678	1.17149	0.445283	1.19716	0.48371	A	B	A	-			5.12571e+06	435715	474111	2.01185e+06	2.69676e+06	134.044	619823	423852	634918	559531	117743	21.0432	830676	527689	534217	630861	173076	27.4349	378465	336895	468753	394704	67412.8	17.0793
pos	TG(18:0_20:0_22:0)	TG	18:0_20:0_22:0	(18:0_20:0_22:0)	974.924	C63H122O6		47.736	+NH4	3.97425	0.185728	1.59826	0.551516	20.6454	0.423868	12.9174	0.43576	5.1948	0.486875	-	-	-	B			41064.3	715917	822894	526625	423896	80.493	655859	933888	1.40151e+06	997086	376822	37.7923	615306	876545	877463	789771	151092	19.1311	626459	570369	667554	621461	48785	7.85006
pos	DGDG(16:0_18:3)	DGDG	16:0_18:3	(16:0_18:3)	914.597	C49H86O15		27.16	+H	0.992982	0.965738	1.19453	0.350817	0.902995	0.51765	0.755942	0.163346	0.909377	0.49037	A	-	-	-			522964	1.41297e+07	1.81327e+07	1.09285e+07	9.23104e+06	84.4677	1.91809e+07	2.46722e+07	5.92227e+06	1.65918e+07	9.63939e+06	58.0973	7.67888e+06	9.20713e+06	1.5418e+07	1.0768e+07	4.09886e+06	38.0652	7.21958e+06	2.15412e+07	1.55212e+07	1.47607e+07	7.19103e+06	48.7175
pos	MGDG(16:3_17:3)	MGDG	16:3_17:3	(16:3_17:3)	732.481	C42H68O10		15.012	+Na	0.900258	0.799675	1.50341	0.28478	0.947987	0.893516	0.630557	0.0919067	1.05302	0.491382	A	A	A	A			4.1444e+06	2.71024e+07	3.10436e+07	2.07634e+07	1.45268e+07	69.9633	2.11015e+07	3.06999e+07	4.33344e+07	3.17119e+07	1.1151e+07	35.1633	3.93258e+07	4.84993e+07	3.17231e+07	3.98494e+07	8.40035e+06	21.0802	3.63376e+07	3.08986e+07	3.65345e+07	3.45902e+07	3.19856e+06	9.247
pos	PI(18:3_18:3)	PI	18:3_18:3	(18:3_18:3)	854.495	C45H75O13N0P1		14.864	+NH4	1.47315	0.439178	1.18215	0.653732	1.08466	0.804669	0.917534	0.753896	0.736289	0.492007	A	A	A	A			1.00925e+06	38554.2	443077	496959	487585	98.1135	2.05914e+06	212076	110285	793834	1.09697e+06	138.186	3.16381e+06	2.36958e+06	118245	1.88388e+06	1.57981e+06	83.8594	57249	475196	56095.4	196180	241636	123.17
pos	DGDG(18:0_18:2)	DGDG	18:0_18:2	(18:0_18:2)	944.644	C51H92O15		29.585	+Na	1.04577	0.769093	1.63585	0.317488	0.891099	0.585467	0.544731	0.258826	0.852097	0.493214	A	A	A	A			1.93488e+07	5.58318e+06	3.14723e+06	9.35974e+06	8.73611e+06	93.3371	5.67516e+06	6.85771e+06	2.25452e+06	4.92913e+06	2.39056e+06	48.4986	5.08273e+06	2.83998e+06	4.06623e+06	3.99631e+06	1.12301e+06	28.1011	3.90167e+06	4.65023e+06	4.92869e+06	4.49353e+06	531142	11.8201
pos	PG(16:0_16:1)	PG	16:0_16:1	(16:0_16:1)	720.494	C38H73O10N0P1		23.196	+NH4	1.19858	0.405891	1.34482	0.324759	1.03774	0.632486	0.771654	0.368698	0.865803	0.493556	A	A	A	A			5.94869e+06	2056.11	1068.4	1.98394e+06	3.43357e+06	173.069	634695	356364	603235	531431	152427	28.6823	1.39858e+06	1.09029e+06	632181	1.04035e+06	385631	37.0675	732649	37714.1	312509	360957	349991	96.962
pos	PE(16:0_22:0)	PE	16:0_22:0	(16:0_22:0)	775.609	C43H86O8N1P1		34.209	+Na	1.40387	0.150284	1.43746	0.521984	1.23518	0.265065	0.859279	0.75733	0.879839	0.49582	-	-	-	B			3.1937e+07	227.081	728.566	1.0646e+07	1.84386e+07	173.197	1223.01	1439.5	198.062	953.521	663.141	69.5465	4234.98	312.438	339.729	1629.05	2256.85	138.538	2139.15	192.388	2081.45	1471	1107.68	75.3016
neg	DGDG(10:0_26:4)	DGDG	1_1_1900 12:04:00 PM	(10:0_26:4)	940.612	C51H88O15		20.724	+HCOO	2.6653	0.0473788	4.54465	0.0211548	2.33807	0.0818115	0.514468	0.0900437	0.877228	0.497998	-	-	C	-			1.55373e+07	9.79846e+06	1.34309e+07	1.29222e+07	2.90302e+06	22.4654	4.28226e+06	1.11429e+07	3.36457e+07	1.6357e+07	1.53604e+07	93.9075	144053	2.28369e+07	9.9898e+06	1.09902e+07	1.13794e+07	103.541	8.61382e+06	1.81256e+07	1.57864e+07	1.41753e+07	4.95635e+06	34.9647
pos	TG(16:0_18:2_18:3)	TG	16:0_18:2_18:3	(16:0_18:2_18:3)	852.721	C55H96O6		39.136	+NH4	1.0781	0.779205	1.04673	0.848978	0.895416	0.53273	0.855441	0.510408	0.830549	0.498881	A	A	A	A			1.31792e+08	203653	506731	4.41675e+07	7.58853e+07	171.813	449261	267165	522309	412912	131398	31.8224	175861	1.55452e+06	1.01887e+06	916417	695016	75.8406	9.69761e+06	1.9337e+06	692000	4.10777e+06	4.88059e+06	118.814
neg	MGMG(15:2)	MGMG	15:02:00	(15:2)	474.283	C24H42O9		8.142	-H	58.5478	0.0265038	114.615	0.043443	39.7667	0.223607	0.346958	0.0873433	0.679218	0.500598	-	-	B	-			24106.1	3.76092e+06	9.66471e+06	4.48325e+06	4.86072e+06	108.42	7.03375e+06	1.14586e+07	7.56419e+06	8.68551e+06	2.41615e+06	27.8181	6.67741e+06	1.18713e+07	1.36394e+07	1.07294e+07	3.61874e+06	33.7274	4.93079e+06	9.96423e+06	1.63323e+07	1.04091e+07	5.71373e+06	54.8918
pos	PC(39:2p)	PC	39:2p	(39:2p)	811.645	C47H90O7N1P1		36.379	+H	1.4004	0.217766	1.65487	0.0421411	1.21506	0.378342	0.734235	0.0745809	0.867654	0.503516	-	-	C	-			4.64709e+06	1.57753e+07	1.36004e+07	1.13409e+07	5.89813e+06	52.0076	2.03415e+07	8.6797e+06	1.38371e+07	1.42861e+07	5.84384e+06	40.9058	1.53461e+07	2.39645e+07	1.39075e+07	1.77394e+07	5.43887e+06	30.6599	3.73647e+07	1.2704e+07	1.18742e+07	2.06477e+07	1.44834e+07	70.1453
pos	TG(16:0_17:1_18:1)	TG	16:0_17:1_18:1	(16:0_17:1_18:1)	844.752	C54H100O6		42.86	+NH4	0.936503	0.876472	0.510059	0.224536	0.723196	0.445539	1.41787	0.224332	0.77223	0.503796	A	A	A	A			1.41308e+07	425170	3.19605e+06	5.91735e+06	7.24675e+06	122.466	0	4.17931e+06	2.27992e+06	2.15307e+06	2.09254e+06	97.1884	43316.8	8.41604e+06	3.75528e+06	4.07155e+06	4.19531e+06	103.04	0	8.36421e+06	1.80963e+07	8.82018e+06	9.05678e+06	102.682
pos	MGDG(18:3_20:1)	MGDG	18:3_20:1	(18:3_20:1)	806.591	C47H82O10		29.701	+Na	1.66499	0.215233	1.99229	0.11077	1.36063	0.0802658	0.682946	0.218367	0.817197	0.505278	A	A	B	A			612257	7.87717e+06	4.62341e+06	4.37095e+06	3.63903e+06	83.255	6.13103e+06	880164	3.68962e+06	3.56694e+06	2.62758e+06	73.6649	4.36802e+06	3.09628e+06	4.23593e+06	3.90008e+06	699239	17.9289	4.19728e+06	3.60959e+06	5.1566e+06	4.32116e+06	780913	18.0719
pos	TG(18:0_16:0_17:0)	TG	18:0_16:0_17:0	(18:0_16:0_17:0)	848.783	C54H104O6		47.327	+NH4	0.632889	0.239615	0.612915	0.226015	0.881486	0.771393	1.43819	0.48167	1.3928	0.50547	-	B	-	-			4.05222e+06	8.95715e+06	9.31094e+06	7.4401e+06	2.93932e+06	39.5064	6.76658e+06	6.97518e+06	9.21134e+06	7.65103e+06	1.35528e+06	17.7138	9.12822e+06	9.54386e+06	9.37493e+06	9.349e+06	209028	2.23584	7.19744e+06	4.01942e+06	6.67013e+06	5.96233e+06	1.70314e+06	28.565
pos	PI(16:0_16:0)	PI	16:0_16:0	(16:0_16:0)	810.526	C41H79O13N0P1		18.353	+Na	1.50065	0.326811	1.27774	0.558416	1.18811	0.198737	0.929854	0.842261	0.79173	0.507743	A	A	A	A			8.60013e+06	2.55774e+07	2.5268e+07	1.98152e+07	9.71374e+06	49.0217	2.72269e+07	2.81739e+07	1.63343e+07	2.39117e+07	6.5793e+06	27.515	1.92185e+07	1.48561e+07	1.54563e+07	1.65103e+07	2.3645e+06	14.3214	1.9256e+07	2.55574e+07	1.5399e+07	2.00708e+07	5.12796e+06	25.5494
pos	TG(18:2_18:2_16:0)	TG	18:2_18:2_16:0	(18:2_18:2_16:0)	854.736	C55H98O6		40.406	+NH4	1.0079	0.965593	1.00499	0.974728	0.876685	0.458125	0.872331	0.467447	0.869812	0.510989	A	A	A	A			9.69197e+07	5.95465e+07	2.58038e+07	6.07567e+07	3.55734e+07	58.5506	3.20315e+07	9.63011e+07	4.26233e+07	5.69853e+07	3.44579e+07	60.468	1.02431e+08	5.12604e+07	3.69394e+07	6.35437e+07	3.44304e+07	54.1838	1.03198e+08	7.847e+07	1.09936e+08	9.72014e+07	1.65679e+07	17.0449
pos	PC(18:0_18:2)	PC	18:0_18:2	(18:0_18:2)	785.593	C44H84O8N1P1		44.137	+H	0.77753	0.393001	1.942	0.0133242	1.04173	0.911883	0.536423	0.0960417	1.3398	0.511764	B	B	B	-			1.16453e+08	2.93458e+07	2.91125e+07	5.83038e+07	5.03589e+07	86.3733	2.87079e+07	3.30821e+07	1.80939e+07	2.66279e+07	7.70755e+06	28.9454	2.69754e+07	1.59144e+07	2.13598e+07	2.14165e+07	5.53071e+06	25.8245	2.19086e+07	2.71564e+07	2.22984e+07	2.37878e+07	2.92381e+06	12.2912
pos	DG(14:0_18:3)	DG	14:0_18:3	(14:0_18:3)	562.46	C35H62O5		16.19	+Na	1.26835	0.245108	1.75172	0.0203752	1.16034	0.401991	0.662402	0.0311813	0.914845	0.512623	-	-	B	C			2.28703e+07	5.21329e+06	6.73768e+06	1.16071e+07	9.78394e+06	84.2929	4.67255e+06	6.01144e+06	8.85977e+06	6.51459e+06	2.13847e+06	32.8259	7.03357e+06	1.18213e+07	1.07528e+07	9.86922e+06	2.51318e+06	25.4648	5.26666e+06	6.29964e+06	7.46618e+06	6.34416e+06	1.10043e+06	17.3456
pos	TG(16:1_16:1_17:1)	TG	16:1_16:1_17:1	(16:1_16:1_17:1)	814.705	C52H94O6		39.47	+NH4	0.556477	0.266775	0.615434	0.295857	0.757407	0.403165	1.23069	0.588069	1.36107	0.512744	A	-	-	-			9.33094e+06	6.2989e+07	5.38513e+07	4.20571e+07	2.87076e+07	68.2586	6.24403e+07	2.95731e+07	4.48051e+07	4.56062e+07	1.64483e+07	36.0659	5.84864e+07	4.51712e+07	1.95026e+07	4.10534e+07	1.98155e+07	48.2675	4.30967e+07	7.35074e+07	1.25076e+08	8.05602e+07	4.14424e+07	51.4428
pos	DG(18:3_18:2)	DG	18:3_18:2	(18:3_18:2)	614.491	C39H66O5		25.807	+NH4	1.57887	0.0987389	2.23345	0.0194579	3.33151	0.404855	1.49164	0.671359	2.11005	0.513733	A	A	A	A			1.83389e+06	4.16278e+06	4.34518e+06	3.44729e+06	1.40021e+06	40.6178	4.3582e+06	3.8531e+06	5.05372e+06	4.42167e+06	602820	13.6333	6.0602e+06	7.42786e+06	6.28577e+06	6.59128e+06	733225	11.1242	5.074e+06	3.56437e+06	4.93113e+06	4.52317e+06	833409	18.4253
pos	TG(8:0_10:3_18:3)	TG	8:0_10:3_18:3	(8:0_10:3_18:3)	626.455	C39H62O6		11.918	+H	2.19314	0.296182	1.43085	0.134154	1.50222	0.321718	1.04988	0.876963	0.684963	0.518137	A	A	A	A			3.99176e+06	316082	368517	1.55879e+06	2.10718e+06	135.181	161191	220890	223533	201871	35255	17.4641	474853	277254	245567	332558	124245	37.3605	365134	297854	361342	341443	37797.2	11.0698
pos	DG(34:1p)	DG	34:1p	(34:1p)	578.527	C37H70O4		25.493	+Na	1.02341	0.937532	1.1998	0.57157	0.86721	0.574598	0.722797	0.32172	0.847373	0.518474	C	-	-	-			448955	1.56896e+07	1.12367e+07	9.12507e+06	7.83667e+06	85.8806	1.11274e+07	1.65187e+07	2.76121e+06	1.01358e+07	6.93216e+06	68.393	8.48034e+06	3.27697e+06	9.93159e+06	7.22964e+06	3.49917e+06	48.4004	1.19602e+07	1.22934e+07	8.78711e+06	1.10136e+07	1.93537e+06	17.5726
pos	PG(18:1_18:3)	PG	18:1_18:3	(18:1_18:3)	770.51	C42H75O10N0P1		24.692	+Na	1.40366	0.446395	1.92908	0.0113083	2.27293	0.369376	1.17824	0.786437	1.61929	0.524612	-	B	-	-			2.21365e+06	4860.07	3137.45	740549	1.27574e+06	172.27	105860	70437.3	18686.5	64994.7	43841	67.4532	17316.1	18436.6	42660.9	26137.9	14320.4	54.7878	982166	9747.77	20988.8	337634	558209	165.33
pos	PG(16:1_18:3)	PG	16:1_18:3	(16:1_18:3)	742.479	C40H71O10N0P1		21.447	+NH4	1.28952	0.482064	1.79007	0.131063	1.03034	0.783073	0.575591	0.13642	0.799013	0.52581	-	B	A	A			1.50473e+08	2.58669e+06	3.08835e+06	5.20494e+07	8.52379e+07	163.763	1.67846e+06	2.97867e+06	5.18983e+06	3.28232e+06	1.77527e+06	54.0859	1.53463e+06	3.03517e+06	3.33204e+06	2.63395e+06	963540	36.5816	1.84903e+06	2.89182e+06	2.50936e+06	2.41673e+06	527528	21.8282
pos	TG(22:5_11:4_14:4)	TG	22:5_11:4_14:4	(22:5_11:4_14:4)	766.517	C50H70O6		16.465	+NH4	2.34895	0.290457	1.32741	0.104901	1.58742	0.346046	1.19588	0.647383	0.675799	0.526261	B	C	C	-			288291	3.69694e+07	3.78091e+06	1.36795e+07	2.02451e+07	147.995	2.6532e+07	3.74872e+07	4.42998e+07	3.61063e+07	8.96404e+06	24.8268	2.3253e+07	5.85772e+06	4.0215e+07	2.31086e+07	1.71791e+07	74.3408	1.78958e+07	1.4042e+07	2.70921e+07	1.96767e+07	6.70479e+06	34.0748
pos	PG(18:0_16:0)	PG	18:0_16:0	(18:0_16:0)	750.541	C40H79O10N0P1		30.162	+NH4	0.962207	0.873333	1.23998	0.486807	1.10171	0.511227	0.888491	0.665349	1.14499	0.527481	A	A	A	A			2.18804e+07	1.39197e+07	7.20347e+06	1.43345e+07	7.34726e+06	51.2557	8.47897e+06	7.25757e+06	7.01078e+06	7.58244e+06	786164	10.3682	1.14797e+07	1.57507e+07	1.07571e+07	1.26625e+07	2.69875e+06	21.313	7.52108e+06	8.07701e+06	8.35522e+06	7.98443e+06	424706	5.31917
pos	TG(18:0_16:0_18:1)	TG	18:0_16:0_18:1	(18:0_16:0_18:1)	860.783	C55H104O6		45.969	+NH4	1.03894	0.830202	0.633256	0.0467026	0.851797	0.598595	1.34511	0.445641	0.819871	0.529671	A	A	A	A			9.00893e+06	4.28578e+06	5.86897e+06	6.38789e+06	2.40395e+06	37.6329	45880.5	5.61257e+06	8.14338e+06	4.60061e+06	4.14251e+06	90.0427	2.13079e+06	9.97193e+06	7.8354e+06	6.64604e+06	4.05361e+06	60.9929	7.80001e+06	9.39218e+06	8.04528e+06	8.41249e+06	857252	10.1902
pos	Cer(d18:1+hO_27:0)	Cer	d18:1+hO_27:0	(d18:1+hO_27:0)	707.679	C45H89O4N1		36.289	+H	1.04878	0.862112	1.06935	0.694488	0.874356	0.501068	0.817653	0.231688	0.833692	0.531246	B	B	B	B			1.14453e+07	1.27834e+06	1.5774e+06	4.767e+06	5.78547e+06	121.365	2.15317e+06	2.08069e+06	3.64239e+06	2.62542e+06	881470	33.5745	5.4085e+06	611059	2.83267e+06	2.95074e+06	2.4009e+06	81.366	978969	6.00919e+06	1.13026e+06	2.70614e+06	2.86152e+06	105.742
pos	TG(18:4_10:3_12:2)	TG	18:4_10:3_12:2	(18:4_10:3_12:2)	676.47	C43H64O6		14.658	+Na	1.86734	0.29823	1.2896	0.49677	1.32795	0.586787	1.02974	0.948956	0.711148	0.531287	-	-	A	-			6.44005e+07	3.7763e+06	3.93212e+06	2.40363e+07	3.49565e+07	145.432	2.8334e+06	2.91927e+06	4.08212e+06	3.27826e+06	697480	21.2759	3.32146e+06	4.49633e+06	3.02896e+06	3.61559e+06	776644	21.4804	3.85781e+06	4.15807e+06	5.14022e+06	4.38536e+06	670736	15.2949
pos	PE(16:0_22:1)	PE	16:0_22:1	(16:0_22:1)	773.593	C43H84O8N1P1		34.968	+H	2.01983	0.337239	3.4508	0.46866	3.11599	0.25584	0.902978	0.920359	1.5427	0.533637	-	-	-	B			460.592	6.86044e+07	1.3657e+08	6.83915e+07	6.82848e+07	99.844	6.81985e+07	1.73623e+08	2.61566e+08	1.67796e+08	9.68154e+07	57.6984	1.6035e+08	7.09893e+07	1.16303e+08	1.15881e+08	4.46817e+07	38.5583	9.16233e+07	6.31223e+07	2.03237e+08	1.19327e+08	7.40517e+07	62.0576
pos	PC(16:1_19:0)	PC	16:1_19:0	(16:1_19:0)	773.593	C43H84O8N1P1		25.652	+H	2.01983	0.337239	3.4508	0.46866	3.11599	0.25584	0.902978	0.920359	1.5427	0.533637	C	B	-	-			460.592	4.11005e+06	5.31086e+06	3.14046e+06	2.78481e+06	88.6753	4.80403e+06	4.4125e+06	4.56996e+06	4.5955e+06	197014	4.28711	7.22301e+06	5.8758e+06	5.63397e+06	6.24426e+06	856203	13.7118	4.14609e+06	4.31475e+06	7.05987e+06	5.17357e+06	1.63576e+06	31.6176
pos	TG(18:3_10:4_14:4)	TG	18:3_10:4_14:4	(18:3_10:4_14:4)	700.47	C45H64O6		17.643	+H	1.25788	0.641127	1.01509	0.934	0.786364	0.718842	0.774675	0.701908	0.625148	0.533645	B	-	-	-			539276	1.73274e+06	658065	976693	657442	67.3131	1.30328e+06	644009	2.89999e+06	1.61576e+06	1.16e+06	71.7928	602072	1.468e+06	919619	996562	438059	43.9571	4.33466e+06	5.19888e+06	1.84421e+06	3.79258e+06	1.74179e+06	45.9262
pos	Cer(d18:1+hO_22:0)	Cer	d18:1+hO_22:0	(d18:1+hO_22:0)	637.601	C40H79O4N1		32.551	+H	0.750478	0.0273627	0.951332	0.686965	0.823446	0.179623	0.865572	0.392034	1.09723	0.534413	-	B	-	B			626508	1.71399e+07	1.76248e+07	1.17971e+07	9.67705e+06	82.0291	1.80604e+07	1.8006e+07	2.8971e+07	2.16791e+07	6.31503e+06	29.1296	3.31345e+07	3.38596e+07	2.92973e+07	3.20971e+07	2.45166e+06	7.63825	2.10105e+07	1.89839e+07	2.47851e+07	2.15931e+07	2.94415e+06	13.6347
pos	TG(16:0_14:0_18:3)	TG	16:0_14:0_18:3	(16:0_14:0_18:3)	800.689	C51H92O6		41.401	+H	1.06001	0.880439	0.685355	0.0371508	0.798553	0.202855	1.16517	0.434999	0.753342	0.536944	A	A	A	A			6.20858e+06	141945	102620	2.15105e+06	3.51398e+06	163.361	1.09205e+06	179970	2.10593e+06	1.12598e+06	963428	85.5634	2.15562e+06	116712	1.25534e+06	1.17589e+06	1.02177e+06	86.8935	665830	627271	86464.9	459855	323940	70.4439
pos	DG(18:1_18:1)	DG	18:1_18:1	(18:1_18:1)	620.538	C39H72O5		32.308	+NH4	0.961542	0.882275	1.19397	0.457151	1.38972	0.560577	1.16394	0.769543	1.4453	0.53773	A	A	A	A			1.51968e+07	1.34753e+07	1.05633e+07	1.30785e+07	2.34206e+06	17.9078	7.83182e+06	1.23567e+07	1.6474e+07	1.22208e+07	4.32267e+06	35.3714	1.25035e+07	1.30309e+07	1.35126e+07	1.30157e+07	504744	3.87797	1.36634e+07	7.57408e+06	1.71491e+07	1.27955e+07	4.84616e+06	37.8738
pos	TG(24:1_18:2_18:3)	TG	24:1_18:2_18:3	(24:1_18:2_18:3)	962.83	C63H110O6		44.845	+NH4	1.35437	0.403369	1.16026	0.485185	1.08777	0.784968	0.937524	0.789474	0.803155	0.540446	A	A	B	A			1.82737e+06	1.67282e+07	1.65715e+07	1.1709e+07	8.55812e+06	73.09	1.49672e+07	1.52957e+07	1.88275e+07	1.63635e+07	2.1402e+06	13.0791	1.66649e+07	1.98791e+07	1.9999e+07	1.88477e+07	1.89125e+06	10.0344	1.09111e+07	8.0407e+06	1.31639e+07	1.07052e+07	2.56781e+06	23.9864
pos	TG(15:0_16:1_16:0)	TG	15:0_16:1_16:0	(15:0_16:1_16:0)	790.705	C50H94O6		40.964	+NH4	0.661322	0.289818	0.640168	0.162085	0.497145	0.0702159	0.776585	0.415946	0.751744	0.543971	A	A	A	A			4.545e+07	539024	667727	1.55522e+07	2.58923e+07	166.486	280592	377712	620357	426220	175000	41.0585	662248	517091	458437	545925	104921	19.2189	623001	453473	565497	547324	86213.1	15.7518
pos	TG(18:4_16:0_16:1)	TG	18:4_16:0_16:1	(18:4_16:0_16:1)	824.689	C53H92O6		40.258	+H	0.721079	0.473598	0.640491	0.286884	0.516231	0.195864	0.805992	0.613228	0.715915	0.550463	A	A	A	-			3.44949e+07	9.80759e+06	1.7369e+07	2.05572e+07	1.26487e+07	61.5292	2.8712e+07	1.68003e+07	4.24487e+07	2.93203e+07	1.2835e+07	43.7752	1.19571e+07	4.08363e+07	2.59518e+07	2.62484e+07	1.44419e+07	55.0202	1.26977e+07	1.66648e+06	1.66934e+07	1.03525e+07	7.78311e+06	75.1808
pos	TG(8:0_8:0_10:3)	TG	8:0_8:0_10:3	(8:0_8:0_10:3)	492.345	C29H48O6		14.432	+H	0.136242	0.058261	0.177533	0.0681314	0.339967	0.152651	1.91494	0.629529	2.49531	0.553767	A	A	A	A			7.07742e+06	4109.27	6557.32	2.36269e+06	4.08307e+06	172.814	109456	84222.6	104495	99391.2	13368.5	13.4504	127190	456875	244781	276282	167084	60.4761	24514	24454.6	16063.9	21677.5	4861.64	22.4271
pos	TG(8:0_8:0_8:0)	TG	8:0_8:0_8:0	(8:0_8:0_8:0)	470.361	C27H50O6		14.422	+Na	0.143852	0.0811957	0.184735	0.0928681	0.352487	0.184294	1.90807	0.629455	2.45035	0.556998	A	A	A	A			3.15802e+08	1.21227e+07	1.58321e+07	1.14585e+08	1.74268e+08	152.086	2.60903e+07	1.93757e+07	2.14515e+07	2.23058e+07	3.43787e+06	15.4124	8.77415e+07	1.96725e+07	8.1434e+06	3.85191e+07	4.30158e+07	111.674	2.87758e+06	6.3225e+06	4.19758e+06	4.46589e+06	1.73806e+06	38.9187
pos	TG(18:3_18:2_22:4)	TG	18:3_18:2_22:4	(18:3_18:2_22:4)	928.752	C61H100O6		40.839	+H	1.003	0.990496	1.03505	0.829389	1.20331	0.497993	1.16256	0.568754	1.19972	0.559447	A	A	A	A			5.50668e+06	1.02183e+08	1.36064e+08	8.12514e+07	6.7749e+07	83.3819	1.25881e+08	1.39213e+08	2.12764e+08	1.59286e+08	4.67906e+07	29.3752	1.9256e+08	1.52795e+08	2.37083e+08	1.94146e+08	4.21668e+07	21.7191	9.67897e+07	6.88081e+07	1.28391e+08	9.79965e+07	2.981e+07	30.4195
pos	TG(15:0_14:0_16:0)	TG	15:0_14:0_16:0	(15:0_14:0_16:0)	764.689	C48H92O6		40.409	+NH4	0.723531	0.364594	0.482357	0.149519	0.650573	0.275863	1.34874	0.247472	0.899165	0.559989	A	A	A	A			8.44012e+06	4.24006e+07	4.9463e+07	3.34346e+07	2.1932e+07	65.5967	5.43707e+07	5.0884e+07	6.69195e+07	5.73914e+07	8.4337e+06	14.6951	3.43048e+07	9.02925e+07	6.147e+07	6.20224e+07	2.7998e+07	45.1417	5.07511e+07	4.88441e+07	5.58695e+07	5.18216e+07	3.633e+06	7.0106
pos	PC(20:0e_18:3)	PC	20:0e_18:3	(20:0e_18:3)	797.63	C46H88O7N1P1		30.926	+H	1.09918	0.662142	1.20628	0.304757	0.961689	0.722545	0.797238	0.24667	0.874917	0.560154	B	-	-	B			1.10193e+07	6.38753e+06	7.39401e+06	8.26696e+06	2.43617e+06	29.4688	7.69064e+06	7.13024e+06	1.02239e+07	8.34826e+06	1.64834e+06	19.7447	3.40864e+06	4.86351e+06	4.14804e+06	4.14006e+06	727468	17.5714	4.76287e+06	1.09329e+07	5.26723e+06	6.98765e+06	3.42594e+06	49.0286
pos	PC(19:0_18:1)	PC	19:0_18:1	(19:0_18:1)	801.625	C45H88O8N1P1		30.91	+H	1.02772	0.908913	1.51292	0.191895	0.889353	0.600169	0.587839	0.13363	0.865362	0.563864	-	-	B	-			1.02219e+06	4.51595e+06	3.09548e+06	2.87787e+06	1.75702e+06	61.0527	3.82959e+06	3.1828e+06	4.29078e+06	3.76772e+06	556575	14.7722	6.85658e+06	7.52396e+06	4.93838e+06	6.43964e+06	1.34227e+06	20.8438	3.13499e+06	3.73629e+06	3.74964e+06	3.54031e+06	351076	9.91653
neg	DGDG(17:3_19:3)	DGDG	1_1_1900 12:06:00 PM	(17:3_19:3)	936.581	C51H84O15		48.732	+HCOO	0.117754	0.27066	2.05646	0.63906	0.243547	0.326099	0.118431	0.438716	2.06828	0.565412	-	-	C	-			504641	3.76396e+07	2.5608e+07	2.12507e+07	1.8947e+07	89.1594	3.19465e+07	3.79646e+07	9.17986e+06	2.63636e+07	1.51828e+07	57.5898	3.47282e+07	1.50577e+07	2.12886e+07	2.36915e+07	1.0053e+07	42.433	2.38909e+07	2.42674e+07	2.28654e+07	2.36746e+07	725599	3.06489
pos	Cer(d18:0+pO_24:0+O)	Cer	d18:0+pO_24:0+O	(d18:0+pO_24:0+O)	683.643	C42H85O5N1		33.956	+H	0.868637	0.519062	0.920094	0.69971	0.772957	0.204245	0.840085	0.423984	0.88985	0.566872	B	B	B	B			4.17391e+06	5.44246e+07	5.3963e+07	3.75205e+07	2.88799e+07	76.971	4.42418e+07	5.57365e+07	6.62083e+07	5.53956e+07	1.09872e+07	19.8341	6.46453e+07	7.83045e+07	7.36008e+07	7.21835e+07	6.93903e+06	9.61304	6.03063e+07	4.23216e+07	6.36816e+07	5.54365e+07	1.14825e+07	20.7129
pos	PC(32:1)	PC	1.33403	(32:1)	731.547	C40H78O8N1P1		30.901	+H	0.964603	0.861993	1.60924	0.026284	0.864863	0.433431	0.537435	0.00183916	0.8966	0.57118	C	-	-	-			1.39683e+07	723082	1.21116e+06	5.30086e+06	7.51021e+06	141.679	1.25397e+06	677748	1.10668e+06	1.0128e+06	299362	29.558	1.44584e+06	1.97443e+06	1.05258e+06	1.49095e+06	462580	31.0259	686233	821411	1.12167e+06	876437	222871	25.4292
pos	PE(20:0_18:2)	PE	20:0_18:2	(20:0_18:2)	771.578	C43H82O8N1P1		33.273	+H	1.30941	0.23251	1.38094	0.490765	1.16217	0.411222	0.841581	0.684961	0.887552	0.573365	A	A	A	A			814014	5.91815e+06	4.23922e+06	3.65713e+06	2.60138e+06	71.1318	5.93491e+06	4.49579e+06	414103	3.61493e+06	2.86387e+06	79.2233	6.48835e+06	1.49496e+06	4.01046e+06	3.99792e+06	2.49672e+06	62.4503	5.1144e+06	4.81238e+06	4.83381e+06	4.92019e+06	168531	3.4253
pos	PC(19:1_16:1)	PC	19:1_16:1	(19:1_16:1)	771.578	C43H82O8N1P1		23.201	+H	1.30941	0.23251	1.38094	0.490765	1.16217	0.411222	0.841581	0.684961	0.887552	0.573365	B	-	B	B			814014	2.51473e+06	1.90848e+06	1.74574e+06	861956	49.3749	1.40508e+06	2.76559e+06	5.95937e+06	3.37668e+06	2.33783e+06	69.2346	3.85877e+06	2.06627e+06	3.46578e+06	3.13027e+06	942170	30.0987	5.08075e+06	1.81302e+06	6.73824e+06	4.544e+06	2.5061e+06	55.1517
pos	So(d17:0+pO)	So	d17:0+pO	(d17:0+pO)	303.277	C17H37O3N1		5.741	+H	0.918087	0.849058	1.23387	0.512857	0.731457	0.453195	0.592816	0.0292722	0.796719	0.574463	B	B	B	B			422430	4.54477e+06	3.41138e+06	2.79286e+06	2.12964e+06	76.2529	4.36074e+06	3.3403e+06	1.18608e+06	2.96238e+06	1.62072e+06	54.7103	3.57056e+06	2.77041e+06	1.96287e+06	2.76795e+06	803851	29.0414	2.92395e+06	4.50796e+06	4.59472e+06	4.00888e+06	940575	23.4623
pos	MGDG(18:3_20:6)	MGDG	18:3_20:6	(18:3_20:6)	796.513	C47H72O10		21.561	+H	2.06566	0.35763	1.86458	0.168511	2.81547	0.166261	1.50998	0.391532	1.36299	0.577684	-	-	B	B			4.15273e+07	2.28285e+08	2.31378e+08	1.67063e+08	1.08728e+08	65.0821	1.72253e+08	3.27533e+08	6.00897e+08	3.66894e+08	2.17016e+08	59.1494	4.44446e+08	5.91903e+08	5.37184e+08	5.24511e+08	7.45412e+07	14.2115	3.44563e+08	3.54743e+08	6.12192e+08	4.37166e+08	1.51663e+08	34.6923
pos	TG(18:0_16:0_20:3)	TG	18:0_16:0_20:3	(18:0_16:0_20:3)	884.783	C57H104O6		48.494	+H	1.31662	0.163625	0.652937	0.0502107	1.10204	0.780175	1.68781	0.284737	0.837019	0.580937	A	A	A	A			5.24048e+06	1.7825e+07	3.07319e+07	1.79325e+07	1.27461e+07	71.0782	2.57184e+07	2.91126e+07	7.31145e+07	4.26485e+07	2.64388e+07	61.9925	514068	9.21945e+07	5.42615e+07	4.899e+07	4.6067e+07	94.0334	7.88712e+07	1.02562e+08	4.18982e+07	7.44437e+07	3.05732e+07	41.0688
pos	DGDG(16:0_18:1)	DGDG	16:0_18:1	(16:0_18:1)	918.628	C49H90O15		27.84	+Na	0.94403	0.557514	1.32179	0.0790773	0.99189	0.891863	0.750412	0.0838066	1.0507	0.586415	A	A	A	A			4.14616e+08	2.63726e+06	3.82865e+06	1.40361e+08	2.37513e+08	169.216	2.90997e+06	4.10046e+06	6.51412e+06	4.50819e+06	1.83634e+06	40.7335	2.90149e+06	5.22193e+06	5.65184e+06	4.59176e+06	1.47951e+06	32.221	3.33557e+06	3.76569e+06	5.47424e+06	4.19183e+06	1.13123e+06	26.9864
pos	TG(20:5_11:4_11:4)	TG	20:5_11:4_11:4	(20:5_11:4_11:4)	696.439	C45H60O6		14.66	+H	1.66992	0.422058	1.54806	0.167521	2.24721	0.220799	1.45163	0.438349	1.3457	0.587091	-	-	-	B			1.64298e+06	1.04163e+06	1.63435e+06	1.43965e+06	344727	23.9452	1.89159e+06	1.38973e+06	2.10458e+06	1.7953e+06	367024	20.4436	2.72662e+06	1.85129e+06	1.78457e+06	2.12083e+06	525693	24.7871	1.05882e+06	1.1179e+06	1.30055e+06	1.15909e+06	126017	10.8721
pos	DGDG(16:3_18:3)	DGDG	16:3_18:3	(16:3_18:3)	908.55	C49H80O15		14.729	+Na	1.10635	0.61817	1.89093	0.0387403	1.03957	0.841397	0.549768	0.05649	0.939641	0.587283	A	A	A	A			2.60519e+06	7.12773e+06	7.40767e+06	5.71353e+06	2.69554e+06	47.1781	6.39388e+06	5.89216e+06	9.99968e+06	7.42857e+06	2.24073e+06	30.1637	8.10571e+06	9.89351e+06	8.14494e+06	8.71472e+06	1.02105e+06	11.7164	7.02184e+06	6.47583e+06	7.60824e+06	7.0353e+06	566327	8.04979
pos	Cer(d18:1+hO_23:0+O)	Cer	d18:1+hO_23:0+O	(d18:1+hO_23:0+O)	667.611	C41H81O5N1		32.743	+H	0.893782	0.605921	1.03656	0.887799	0.989707	0.962195	0.954801	0.846267	1.10732	0.589917	B	B	B	-			258506	3.21095e+07	2.49299e+07	1.90993e+07	1.67069e+07	87.4735	2.59017e+07	3.0389e+07	1.05297e+07	2.22735e+07	1.0415e+07	46.7595	2.14073e+07	1.33895e+07	1.83396e+07	1.77121e+07	4.04552e+06	22.8404	1.65727e+07	3.08964e+07	1.99265e+07	2.24652e+07	7.49174e+06	33.3482
pos	LPE(16:0)	LPE	0.666667	(16:0)	453.286	C21H44O7N1P1		9.776	+H	1.1113	0.645843	1.15274	0.462514	0.987672	0.947614	0.856803	0.393137	0.88875	0.592886	B	B	B	B			1.61841e+07	5.21413e+06	2.47862e+06	7.95895e+06	7.25331e+06	91.1341	2.36752e+06	2.0383e+06	4.30338e+06	2.90307e+06	1.22383e+06	42.1563	3.10171e+06	2.82983e+06	2.11512e+06	2.68222e+06	509589	18.9988	3.59278e+06	2.13968e+06	1.97649e+06	2.56965e+06	889810	34.6277
pos	TG(18:3_18:2_20:2)	TG	18:3_18:2_20:2	(18:3_18:2_20:2)	904.752	C59H100O6		39.303	+NH4	1.17504	0.537029	1.34951	0.0232831	1.35026	0.202629	1.00055	0.997262	1.14912	0.594778	A	A	A	A			1.47821e+07	8.9649e+07	1.43744e+08	8.2725e+07	6.47592e+07	78.2824	9.38012e+07	1.03126e+08	4.14747e+07	7.94675e+07	3.32314e+07	41.8177	1.14999e+08	1.41216e+08	1.86266e+08	1.47494e+08	3.60457e+07	24.4388	4.89064e+07	5.09317e+07	1.36039e+07	3.7814e+07	2.0991e+07	55.5113
pos	TG(18:3_18:3_18:3)	TG	18:3_18:3_18:3	(18:3_18:3_18:3)	872.689	C57H92O6		35.636	+NH4	1.29251	0.34325	1.19914	0.397647	1.14277	0.581139	0.952989	0.779065	0.884152	0.595284	A	A	A	A			1.06533e+06	2.67446e+07	3.20412e+07	1.99503e+07	1.65679e+07	83.0459	4.14502e+07	2.44627e+07	5.7053e+07	4.09887e+07	1.63001e+07	39.7672	2.20489e+07	7.08434e+07	4.66648e+07	4.6519e+07	2.43976e+07	52.4464	1.82118e+07	1.92652e+07	1.80655e+07	1.85141e+07	654508	3.53518
pos	MGDG(17:3_18:3)	MGDG	17:3_18:3	(17:3_18:3)	760.513	C44H72O10		17.338	+Na	1.31532	0.216587	2.01249	0.0501572	1.43015	0.0128397	0.710637	0.148607	1.0873	0.596686	A	A	A	A			457810	2.50675e+08	3.32567e+08	1.94566e+08	1.73018e+08	88.9249	2.98416e+08	2.93385e+08	4.065e+08	3.32767e+08	6.39042e+07	19.2039	4.23929e+08	5.32164e+08	4.31522e+08	4.62538e+08	6.04171e+07	13.0621	2.96588e+08	2.73518e+08	3.67361e+08	3.12489e+08	4.89008e+07	15.6488
pos	TG(8:0_8:0_10:0)	TG	8:0_8:0_10:0	(8:0_8:0_10:0)	498.392	C29H54O6		18.661	+NH4	2.04827	0.639695	0.0858677	0.204177	0.856553	0.857184	9.97526	0.303644	0.418184	0.599069	A	A	A	A			96769.8	2.53577e+08	2.96372e+08	1.83349e+08	1.60137e+08	87.34	1.05983e+08	1.12348e+08	1.58095e+08	1.25475e+08	2.84284e+07	22.6566	1.83707e+08	2.23978e+08	2.64902e+08	2.24195e+08	4.05981e+07	18.1083	2.56103e+08	2.4376e+08	3.0681e+08	2.68891e+08	3.34135e+07	12.4264
pos	TG(16:1_18:1_16:0)	TG	16:1_18:1_16:0	(16:1_18:1_16:0)	830.736	C53H98O6		42.024	+NH4	0.7838	0.322189	0.6304	0.102716	0.700199	0.154423	1.11072	0.557831	0.89334	0.5992	A	A	A	A			4.34604e+07	2.91243e+06	2.27835e+06	1.62171e+07	2.35956e+07	145.498	2.54435e+06	1.38791e+06	2.1707e+06	2.03432e+06	590160	29.0102	2.02899e+06	773438	873376	1.22527e+06	697837	56.9538	2.6779e+06	2.70041e+06	2.24454e+06	2.54095e+06	256948	10.1123
pos	TG(14:0p_18:0_18:0)	TG	14:0p_18:0_18:0	(14:0p_18:0_18:0)	818.773	C53H102O5		45.73	+H	1.14167	0.603217	1.21676	0.0809234	0.993876	0.965817	0.816823	0.174807	0.870543	0.600574	A	-	-	-			843026	4.24006e+07	4.9463e+07	3.09022e+07	2.62704e+07	85.0115	5.43707e+07	5.0884e+07	6.69195e+07	5.73914e+07	8.4337e+06	14.6951	3.43048e+07	9.02925e+07	6.147e+07	6.20224e+07	2.7998e+07	45.1417	5.07511e+07	4.88441e+07	5.58695e+07	5.18216e+07	3.633e+06	7.0106
pos	DGDG(18:0_20:6)	DGDG	18:0_20:6	(18:0_20:6)	964.612	C53H88O15		26.119	+H	0.960842	0.656933	1.30557	0.0807344	1.08171	0.728428	0.828533	0.388741	1.12579	0.603659	A	A	A	-			4.92744e+06	1.58483e+06	3.11503e+06	3.2091e+06	1.67329e+06	52.142	2.69164e+06	4.81423e+06	1.75442e+06	3.08676e+06	1.5677e+06	50.7879	3.0934e+06	2.01867e+06	2.8139e+06	2.64199e+06	557606	21.1056	2.82009e+06	3.60917e+06	1.88833e+06	2.77253e+06	861405	31.0693
pos	PS(43:1)	PS	1.79236	(43:1)	887.662	C49H94O10N1P1		27.347	+Na	1.17184	0.201782	1.47375	8.2237e-05	1.07807	0.626053	0.731516	0.0980469	0.919981	0.604091	C	C	C	C	Other		512491	4.67327e+06	4.18553e+06	3.12376e+06	2.27454e+06	72.8141	3.75765e+06	3.85538e+06	5.44835e+06	4.35379e+06	949175	21.8011	5.25914e+06	7.22672e+06	4.99664e+06	5.8275e+06	1.21885e+06	20.9155	3.77855e+06	3.66351e+06	3.95192e+06	3.79799e+06	145182	3.8226
pos	PI(18:3_18:2)	PI	18:3_18:2	(18:3_18:2)	856.51	C45H77O13N0P1		16.473	+NH4	1.17913	0.562181	1.31205	0.267297	1.02774	0.834159	0.783308	0.294814	0.871609	0.608964	A	A	A	A			2.06786e+06	6.75284e+07	1.0348e+08	5.76922e+07	5.14167e+07	89.1225	7.61944e+07	7.77688e+07	1.18815e+08	9.09261e+07	2.41654e+07	26.577	1.06605e+08	1.20047e+08	1.09595e+08	1.12082e+08	7.05769e+06	6.29688	7.31557e+07	7.12865e+07	8.87516e+07	7.77312e+07	9.58954e+06	12.3368
pos	PS(36:4p)	PS	36:4p	(36:4p)	767.51	C42H74O9N1P1		20.392	+Na	1.44219	0.158562	1.83155	0.0262656	1.56939	0.0439985	0.856861	0.296092	1.0882	0.61196	C	-	-	-	Superpathway of plastoquinol biosynthesis;Other	Biosynthesis of secondary metabolites;Ubiquinone and other terpenoid-quinone biosynthesis;Other	1.86313e+06	2.26436e+07	6.25253e+07	2.90107e+07	3.08282e+07	106.265	3.69606e+07	2.31197e+07	2.44176e+07	2.81659e+07	7.64398e+06	27.1391	2.18967e+07	5.30686e+07	4.2993e+07	3.93195e+07	1.59073e+07	40.4566	1.65957e+07	4.2458e+07	1.02209e+08	5.37544e+07	4.39106e+07	81.6874
pos	TG(18:3_18:3_20:2)	TG	18:3_18:3_20:2	(18:3_18:3_20:2)	902.736	C59H98O6		38.124	+NH4	1.29954	0.455852	1.74819	0.0102214	1.56934	0.261865	0.897694	0.679229	1.20761	0.612904	A	A	A	A			5.03043e+06	4.1167e+07	4.18969e+07	2.93648e+07	2.10773e+07	71.7776	2.00636e+07	1.6668e+07	3.4832e+07	2.38545e+07	9.65718e+06	40.4836	5.76575e+07	4.51379e+07	1.01557e+07	3.76504e+07	2.46202e+07	65.3915	3.73358e+07	3.43885e+07	6.37953e+07	4.51732e+07	1.61944e+07	35.8496
neg	DGDG(10:0_26:6)	DGDG	1_1_1900 12:06:00 PM	(10:0_26:6)	936.581	C51H84O15		18.964	+HCOO	0.17976	0.463797	0.32394	0.537219	0.223305	0.484766	0.689339	0.550982	1.24223	0.620256	C	-	-	-			159039	3.5484e+06	3.76253e+06	2.48999e+06	2.0215e+06	81.1851	919835	4.79678e+06	2.31203e+07	9.61231e+06	1.18578e+07	123.361	153217	9.42692e+06	5.49616e+06	5.02543e+06	4.65474e+06	92.6236	1.39276e+07	5.14159e+06	4.40106e+06	7.82342e+06	5.29933e+06	67.7368
pos	PA(18:3_18:2)	PA	18:3_18:2	(18:3_18:2)	694.457	C39H67O8N0P1		56.962	+NH4	1.59927	0.436763	0.651774	0.624136	2.33671	0.379047	3.58515	0.296967	1.46111	0.620885	A	A	A	A			8.5336e+08	7.33802e+07	1.04491e+08	3.43744e+08	4.41615e+08	128.472	1.4485e+08	8.40425e+07	1.4801e+08	1.25634e+08	3.6054e+07	28.6976	2.18584e+08	2.3669e+08	2.0392e+08	2.19731e+08	1.64153e+07	7.47063	1.23349e+08	1.30002e+08	1.59839e+08	1.3773e+08	1.94342e+07	14.1103
pos	TG(16:0_17:0_18:3)	TG	16:0_17:0_18:3	(16:0_17:0_18:3)	842.736	C54H98O6		44.42	+H	0.838317	0.389267	0.655579	0.0359633	0.691638	0.318498	1.055	0.89603	0.825031	0.629501	-	A	A	A			3.82905e+06	1.74081e+07	1.78943e+07	1.30438e+07	7.98391e+06	61.2085	1.96744e+07	1.90439e+06	1.61061e+07	1.25616e+07	9.40031e+06	74.8335	1.88136e+07	1.61082e+07	1.46526e+07	1.65248e+07	2.11157e+06	12.7782	6.38651e+06	5.39405e+06	5.27695e+06	5.68584e+06	609616	10.7217
neg	DGMG(23:7)	DGMG	23:07:00	(23:7)	738.383	C38H58O14		22.161	+HCOO	0.81652	0.445569	1.40103	0.117907	0.962158	0.901735	0.686751	0.195948	1.17836	0.632462	-	-	-	B			5.91469e+06	3.34035e+06	3.66628e+06	4.30711e+06	1.40171e+06	32.5442	2.35634e+06	2.42796e+06	3.89006e+06	2.89145e+06	865560	29.9351	3.77726e+06	2.30658e+06	2.89091e+06	2.99158e+06	740488	24.7524	1.50944e+06	4.06516e+06	4.23491e+06	3.26984e+06	1.52691e+06	46.6968
pos	TG(16:0_17:0_18:1)	TG	16:0_17:0_18:1	(16:0_17:0_18:1)	846.768	C54H102O6		44.656	+NH4	0.613544	0.329116	0.330308	0.0322058	0.78088	0.218136	2.3641	0.100737	1.27274	0.633579	A	A	B	A			1.04128e+07	1.27046e+06	1.58248e+06	4.4219e+06	5.19059e+06	117.383	1.79306e+06	1.9205e+06	3.11374e+06	2.27577e+06	728496	32.011	1.56374e+06	3.64679e+06	2.49144e+06	2.56732e+06	1.0436e+06	40.6492	2.81615e+06	2.91117e+06	2.65975e+06	2.79569e+06	126952	4.54098
pos	TG(18:0_18:0_20:4)	TG	18:0_18:0_20:4	(18:0_18:0_20:4)	910.799	C59H106O6		48.22	+H	1.16511	0.668122	0.82374	0.293041	0.943001	0.860458	1.14478	0.723139	0.809368	0.633621	-	-	-	A			4.32332e+06	1.2509e+06	1.50292e+06	2.35905e+06	1.70577e+06	72.3076	1.64968e+06	1.55602e+06	2.11054e+06	1.77208e+06	296830	16.7504	1.25628e+06	2.41995e+06	1.56301e+06	1.74641e+06	603126	34.5351	1.63579e+06	1.31554e+06	215607	1.05564e+06	744907	70.5642
pos	Cer(d18:0+pO_24:0)	Cer	d18:0+pO_24:0	(d18:0+pO_24:0)	667.648	C42H85O4N1		34.562	+H	0.95865	0.891089	1.41339	0.242577	1.03249	0.911138	0.730505	0.10173	1.07703	0.63464	B	B	B	B			1.20764e+06	4.88669e+06	3.53408e+06	3.20947e+06	1.86088e+06	57.9809	4.45169e+06	5.55438e+06	1.0811e+06	3.69572e+06	2.33049e+06	63.059	5.46037e+06	2.00706e+06	2.02231e+06	3.16324e+06	1.98938e+06	62.8905	2.87918e+06	4.73232e+06	3.48208e+06	3.69786e+06	945230	25.5615
pos	PC(16:0_22:3)	PC	16:0_22:3	(16:0_22:3)	811.609	C46H86O8N1P1		22.485	+H	1.38345	0.23136	2.41963	0.000617307	1.51665	0.0335837	0.626811	0.00547477	1.09628	0.643499	B	B	B	-			9.45646e+07	1.67186e+06	2.45237e+06	3.28963e+07	5.34078e+07	162.352	2.13877e+06	1.72545e+06	3.43705e+06	2.43376e+06	893121	36.6972	1.87316e+06	3.0547e+06	3.19647e+06	2.70811e+06	726555	26.8289	2.32212e+06	1.95093e+06	2.0908e+06	2.12128e+06	187466	8.83738
pos	TG(16:0_18:1_18:3)	TG	16:0_18:1_18:3	(16:0_18:1_18:3)	854.736	C55H98O6		43.781	+H	0.909302	0.659092	0.634959	0.0753879	0.787851	0.34181	1.24079	0.503741	0.866435	0.647314	A	A	A	A			2.08972e+07	1.16574e+07	9.95229e+06	1.4169e+07	5.88888e+06	41.5618	8.36584e+06	1.1004e+07	1.49112e+07	1.1427e+07	3.29312e+06	28.8187	7.13634e+06	7.82932e+06	5.4731e+06	6.81292e+06	1.21095e+06	17.7743	1.03916e+07	9.11281e+06	7.28075e+06	8.9284e+06	1.56362e+06	17.5129
pos	DG(18:1_18:2)	DG	18:1_18:2	(18:1_18:2)	618.522	C39H70O5		31.388	+NH4	0.955086	0.783554	1.27633	0.0437041	1.04744	0.748024	0.820664	0.205511	1.0967	0.647743	A	A	A	A			5.07888e+07	1.32131e+08	1.63742e+08	1.15554e+08	5.82727e+07	50.429	2.97285e+08	1.32907e+08	1.94385e+08	2.08192e+08	8.30543e+07	39.8931	4.38129e+08	2.46095e+08	2.31287e+08	3.0517e+08	1.15383e+08	37.8096	2.35864e+08	1.84284e+08	2.28902e+08	2.1635e+08	2.79876e+07	12.9362
pos	DG(16:0_16:1)	DG	16:0_16:1	(16:0_16:1)	566.491	C35H66O5		20.396	+Na	1.16177	0.505687	1.66969	0.0407634	1.08079	0.695196	0.647296	0.0363649	0.930291	0.653009	-	B	-	-			1.12879e+08	7.17937e+06	7.52239e+06	4.2527e+07	6.0927e+07	143.267	5.91006e+06	7.81057e+06	4.21325e+06	5.97796e+06	1.79962e+06	30.1043	6.00846e+06	4.24653e+06	4.31633e+06	4.85711e+06	997714	20.5413	8.7252e+06	5.49491e+06	4.37226e+06	6.19746e+06	2.25991e+06	36.4651
pos	PE(18:2_18:2)	PE	18:2_18:2	(18:2_18:2)	739.515	C41H74O8N1P1		23.709	+H	2.03726	0.347461	1.85383	0.0197815	1.58406	0.209365	0.854482	0.514919	0.777548	0.658666	A	A	A	A			1.01041e+06	1.41406e+06	2.4622e+06	1.62889e+06	749357	46.0041	4.44549e+06	1.51287e+06	2.5898e+06	2.84939e+06	1.48344e+06	52.0618	4.20732e+06	4.17473e+06	3.36591e+06	3.91599e+06	476660	12.1722	2.39363e+06	2.33583e+06	9.11248e+06	4.61398e+06	3.89592e+06	84.4374
pos	TG(18:4_12:3_12:3)	TG	18:4_12:3_12:3	(18:4_12:3_12:3)	702.486	C45H66O6		14.659	+Na	1.40108	0.44063	1.40632	0.146315	1.13599	0.766401	0.80778	0.560555	0.810798	0.660057	-	A	-	-			3.49299e+07	2.44024e+07	2.48061e+07	2.80461e+07	5.96491e+06	21.2682	2.29558e+07	1.47458e+07	1.57324e+07	1.78113e+07	4.48243e+06	25.1662	2.53221e+07	1.41728e+07	1.25767e+07	1.73572e+07	6.94381e+06	40.0053	2.05416e+07	2.87592e+07	2.50746e+07	2.47918e+07	4.11607e+06	16.6025
pos	TG(22:0_18:2_18:3)	TG	22:0_18:2_18:3	(22:0_18:2_18:3)	936.815	C61H108O6		44.673	+NH4	0.502013	0.474273	0.333396	0.354093	0.689827	0.662421	2.06909	0.393871	1.37412	0.660528	B	-	-	-			1.00639e+06	1.30903e+08	1.05007e+08	7.89723e+07	6.87507e+07	87.0567	7.6914e+07	5.26424e+07	8.14707e+07	7.03424e+07	1.5497e+07	22.0308	9.4626e+07	6.76022e+07	3.25226e+07	6.49169e+07	3.11387e+07	47.967	8.42725e+07	1.01095e+08	1.14117e+08	9.98281e+07	1.49626e+07	14.9883
pos	TG(9:0_10:3_13:0)	TG	9:0_10:3_13:0	(9:0_10:3_13:0)	576.439	C35H60O6	C20785	10.378	+Na	2.05414	0.265539	1.58528	0.0623932	1.6448	0.330569	1.03755	0.918367	0.800725	0.660795	-	-	B	-			1.68351e+08	1.38816e+06	2.24872e+06	5.73293e+07	9.61486e+07	167.713	595854	434723	562817	531131	85110.4	16.0244	353321	326750	84838	254970	147936	58.021	79936.9	131199	8978.12	73371.2	61374.3	83.6489
pos	TG(18:3_20:2_20:5)	TG	18:3_20:2_20:5	(18:3_20:2_20:5)	926.736	C61H98O6		39.283	+H	1.45167	0.313415	1.79328	0.165519	1.73975	0.32301	0.970149	0.939247	1.19844	0.666712	-	A	-	-			4.52367e+06	671121	601406	1.93206e+06	2.24466e+06	116.18	533521	519783	657340	570215	75764.8	13.2871	498727	850188	663194	670703	175851	26.2189	919323	815838	616334	783832	154009	19.6482
pos	PC(18:0_18:1)	PC	18:0_18:1	(18:0_18:1)	787.609	C44H86O8N1P1		25.724	+H	2.33109	0.0839419	2.16611	0.0371474	2.84856	0.195086	1.31506	0.564243	1.22199	0.668794	C	A	-	-			394032	685537	876521	652030	242983	37.2657	607389	901788	1.23664e+06	915273	314844	34.3989	940276	1.02672e+06	959408	975468	45404	4.65458	841441	625305	923609	796785	154084	19.3382
neg	SQMG(33:4)	SQMG	1_1_1900 9:04:00 AM	(33:4)	786.495	C42H74O11S1		17.673	+HCOO	1.55424	0.406018	2.22194	0.0197411	1.85193	0.147794	0.833473	0.438414	1.19153	0.672252	-	B	-	B			2.48517e+08	2.91703e+07	2.7455e+07	1.01714e+08	1.27138e+08	124.995	2.50402e+07	2.09909e+07	2.6615e+07	2.42154e+07	2.90134e+06	11.9814	183557	3.4672e+07	2.54574e+07	2.01043e+07	1.78565e+07	88.8192	1.77834e+07	1.9075e+07	2.6517e+07	2.11251e+07	4.71391e+06	22.3142
pos	TG(16:1_14:0_14:0)	TG	16:1_14:0_14:0	(16:1_14:0_14:0)	748.658	C47H88O6		38.25	+NH4	0.783942	0.615301	0.531593	0.243282	0.650352	0.351367	1.2234	0.37087	0.829592	0.672309	A	A	A	-			1.57653e+07	5.34066e+06	4.84205e+06	8.64935e+06	6.16766e+06	71.3078	1.14821e+07	5.12853e+06	2.0726e+07	1.24455e+07	7.84323e+06	63.0205	3.90744e+06	7.87327e+06	8.56209e+06	6.78093e+06	2.51224e+06	37.0485	5.29983e+06	5.0976e+06	8.01221e+06	6.13655e+06	1.62752e+06	26.5217
pos	DGDG(16:0_16:0)	DGDG	16:0_16:0	(16:0_16:0)	892.612	C47H88O15		27.489	+Na	1.01435	0.93955	1.15559	0.379331	0.952909	0.782653	0.82461	0.0924511	0.93943	0.672478	A	A	A	A			2.21827e+07	8.14558e+06	5.71346e+06	1.20139e+07	8.88999e+06	73.9975	7.22872e+06	2.99982e+06	8.20107e+06	6.14321e+06	2.76532e+06	45.0144	4.98888e+06	5.23445e+06	7.8507e+06	6.02468e+06	1.58614e+06	26.3274	7.1558e+06	4.7298e+06	5.28222e+06	5.72261e+06	1.27155e+06	22.2197
pos	TG(20:1_18:1_18:2)	TG	20:1_18:1_18:2	(20:1_18:1_18:2)	910.799	C59H106O6		43.849	+NH4	0.658946	0.403631	0.72049	0.353217	0.798279	0.484364	1.10797	0.525311	1.21145	0.674362	A	B	D	D			3.73869e+06	3.89359e+07	3.46803e+07	2.5785e+07	1.92108e+07	74.504	2.44144e+07	3.30908e+07	4.28288e+07	3.34447e+07	9.21233e+06	27.545	1.81183e+07	6.38259e+07	4.76581e+07	4.32007e+07	2.31775e+07	53.6508	6.00066e+07	6.47396e+07	4.03517e+07	5.50326e+07	1.29324e+07	23.4996
pos	PS(20:0_18:2)	PS	20:0_18:2	(20:0_18:2)	815.568	C44H82O10N1P1		31.943	+H	1.50647	0.45042	1.22609	0.093863	1.24202	0.0244364	1.01299	0.870343	0.824458	0.675176	-	-	A	A			828075	4.45484e+06	3.96149e+06	3.08147e+06	1.96702e+06	63.834	3.54584e+06	5.50258e+06	4.72926e+06	4.59256e+06	985508	21.4588	2.57198e+06	3.42263e+06	2.62782e+06	2.87414e+06	475823	16.5553	7.5426e+06	6.3359e+06	3.55275e+06	5.81042e+06	2.04618e+06	35.2157
pos	PS(16:0_24:0)	PS	16:0_24:0	(16:0_24:0)	847.63	C46H90O10N1P1		35.832	+Na	2.89152	0.297924	3.16093	0.291505	3.99242	0.269803	1.26305	0.758606	1.38074	0.675177	B	B	B	B			4.3976e+07	1.50442e+07	1.79946e+07	2.56716e+07	1.59206e+07	62.0162	5.88735e+06	1.51545e+07	1.42467e+07	1.17629e+07	5.10855e+06	43.4295	2.13599e+07	1.0534e+07	1.35998e+07	1.51646e+07	5.58002e+06	36.7965	1.71206e+07	1.02897e+07	1.80544e+07	1.51549e+07	4.23919e+06	27.9724
pos	TG(15:0_16:1_18:1)	TG	15:0_16:1_18:1	(15:0_16:1_18:1)	816.721	C52H96O6		40.992	+NH4	0.780008	0.470889	0.684667	0.223354	0.674474	0.184489	0.985112	0.950225	0.8647	0.67891	A	A	A	A			3.0476e+07	4.22796e+07	2.75294e+07	3.34283e+07	7.80571e+06	23.3506	1.64838e+07	2.49548e+07	5.34879e+07	3.16422e+07	1.93873e+07	61.2703	1.67655e+07	4.56525e+07	4.03133e+07	3.42438e+07	1.53702e+07	44.8848	3.92743e+07	4.55248e+07	4.97239e+07	4.4841e+07	5.25825e+06	11.7264
pos	TG(20:0_18:2_18:3)	TG	20:0_18:2_18:3	(20:0_18:2_18:3)	908.783	C59H104O6		42.19	+NH4	1.16973	0.55167	1.23711	0.3671	1.04829	0.817016	0.84737	0.494595	0.89618	0.684333	A	A	A	A			4.83152e+06	9.47255e+07	8.00665e+07	5.98745e+07	4.82288e+07	80.5498	4.78137e+07	3.60884e+07	6.98633e+07	5.12552e+07	1.71484e+07	33.457	7.71039e+07	9.17648e+07	7.2086e+07	8.03182e+07	1.02256e+07	12.7313	9.064e+07	7.28258e+07	7.36433e+07	7.90364e+07	1.00574e+07	12.725
pos	TG(12:0e_11:2_11:4)	TG	12:0e_11:2_11:4	(12:0e_11:2_11:4)	584.444	C37H60O5		16.841	+H	1.44502	0.420114	1.79789	0.560579	1.2349	0.219372	0.68686	0.673936	0.854588	0.684744	-	D	B	-			1.15744e+09	620490	3.69667e+06	3.87254e+08	6.67006e+08	172.24	3.31839e+07	994498	795164	1.16579e+07	1.86424e+07	159.913	2.87323e+06	1.57221e+06	4.86288e+06	3.10277e+06	1.6573e+06	53.4135	13458.5	43118.1	14691.2	23755.9	16779.5	70.6329
pos	PS(16:0_18:2)	PS	16:0_18:2	(16:0_18:2)	759.505	C40H74O10N1P1		21.662	+H	1.64473	0.322665	1.35453	0.705091	2.03465	0.302306	1.50211	0.564365	1.23707	0.686392	A	A	A	A			9.77527e+07	8.44418e+06	1.28589e+07	3.96852e+07	5.03363e+07	126.839	1.17923e+07	1.11991e+07	1.78597e+07	1.3617e+07	3.68623e+06	27.0707	6.68786e+06	8.5526e+06	8.01708e+06	7.75251e+06	960112	12.3845	1.03691e+07	1.45051e+07	8.88881e+06	1.12543e+07	2.9109e+06	25.8647
pos	DGDG(16:0_18:2)	DGDG	16:0_18:2	(16:0_18:2)	916.612	C49H88O15		24.072	+Na	1.25946	0.19502	1.59965	0.00015876	1.19346	0.0472019	0.74608	0.00502861	0.947599	0.686455	A	A	A	A			6.94077e+08	2.70741e+07	3.66029e+07	2.52585e+08	3.82373e+08	151.384	3.74134e+07	2.05138e+07	3.64584e+07	3.14619e+07	9.49331e+06	30.174	4.70543e+07	6.86801e+07	5.0524e+07	5.54195e+07	1.16144e+07	20.9572	2.00542e+07	2.90967e+07	3.91476e+07	2.94328e+07	9.55117e+06	32.4507
pos	DG(16:1_16:1)	DG	16:1_16:1	(16:1_16:1)	564.475	C35H64O5		18.162	+Na	1.29692	0.247258	1.80268	0.0211083	1.21789	0.341432	0.675596	0.0306506	0.939063	0.686469	-	-	B	-			1.86508e+08	2.68844e+07	2.70854e+07	8.01594e+07	9.2101e+07	114.897	2.58741e+07	2.60063e+07	1.70664e+07	2.29823e+07	5.12373e+06	22.2943	2.23881e+07	1.29263e+07	1.86439e+07	1.79861e+07	4.76509e+06	26.4932	1.69224e+07	3.02178e+07	1.95464e+07	2.22289e+07	7.04189e+06	31.679
pos	PI(16:0_18:3)	PI	16:0_18:3	(16:0_18:3)	832.51	C43H77O13N0P1		18.379	+NH4	1.25777	0.578707	1.24331	0.496647	1.07385	0.682857	0.863699	0.636999	0.853772	0.691308	A	A	A	A			3.04883e+07	6.23025e+06	2.68763e+07	2.11983e+07	1.30879e+07	61.7404	1.17673e+07	2.12188e+07	3.61432e+07	2.30431e+07	1.22899e+07	53.3344	3.72674e+07	3.42293e+07	2.95155e+07	3.36707e+07	3.90603e+06	11.6007	1.40395e+07	1.17393e+07	2.32797e+07	1.63529e+07	6.1081e+06	37.3519
pos	TG(6:0_13:0_13:0)	TG	6:0_13:0_13:0	(6:0_13:0_13:0)	582.486	C35H66O6		14.447	+Na	1.81303	0.399261	1.11979	0.50956	1.39986	0.588411	1.25011	0.700761	0.772108	0.697895	-	-	B	B			1.00088e+07	5.94521e+08	3.90059e+08	3.3153e+08	2.96619e+08	89.4699	7.01837e+08	4.55318e+08	6.72934e+08	6.1003e+08	1.34762e+08	22.091	6.34853e+08	1.21351e+09	1.20796e+09	1.01877e+09	3.32498e+08	32.637	7.77119e+06	2.6568e+08	1.43859e+08	1.39103e+08	1.2902e+08	92.7512
neg	DGMG(31:9)	DGMG	1_1_1900 7:09:00 AM	(31:9)	846.477	C46H70O14		11.689	-H	2.82136	0.364047	1.42667	0.368104	2.07707	0.288817	1.45589	0.487082	0.736193	0.698031	-	B	-	-			4.63893e+06	2.77432e+07	2.66542e+07	1.96788e+07	1.30362e+07	66.2453	3.21642e+07	4.49526e+07	8.49447e+07	5.40205e+07	2.75339e+07	50.9693	1.18741e+08	1.2813e+08	7.27364e+07	1.06536e+08	2.96451e+07	27.8265	4.66788e+07	5.29966e+07	8.42217e+07	6.1299e+07	2.01013e+07	32.7923
pos	PG(16:0_18:1)	PG	16:0_18:1	(16:0_18:1)	748.525	C40H77O10N0P1		24.938	+NH4	1.08463	0.739625	1.36295	0.154057	1.18307	0.0819882	0.868024	0.396652	1.09076	0.703962	A	A	A	A			2.95672e+07	9.04241e+07	1.43658e+08	8.78832e+07	5.7088e+07	64.959	1.09712e+08	9.99067e+07	1.84832e+08	1.31483e+08	4.64603e+07	35.3355	1.25758e+08	1.67932e+08	8.9282e+07	1.27657e+08	3.93592e+07	30.8319	9.93644e+07	1.02598e+08	1.25648e+08	1.09203e+08	1.43329e+07	13.1249
pos	TG(24:1_10:4_10:4)	TG	24:1_10:4_10:4	(24:1_10:4_10:4)	732.533	C47H72O6		17.183	+Na	0.493781	0.56011	0.816358	0.839945	0.421741	0.511783	0.516613	0.447936	0.854107	0.705257	B	-	-	-			1.91865e+08	1.19559e+06	1.05637e+06	6.47057e+07	1.10123e+08	170.191	932725	1.25735e+06	1.29466e+06	1.16158e+06	199070	17.1379	582418	1.5598e+06	1.20879e+06	1.117e+06	495115	44.3252	786756	889544	595846	757382	149036	19.6777
pos	Cer(d18:2_27:0+O)	Cer	d18:2_27:0+O	(d18:2_27:0+O)	705.663	C45H87O4N1		34.52	+H	1.81256	0.531979	2.82359	0.383631	1.32934	0.716888	0.470798	0.464181	0.733404	0.706358	-	-	B	-			1.61004e+06	369350	543129	840839	671789	79.8951	287421	390874	514383	397559	113629	28.5816	614441	394876	371817	460378	133920	29.0891	378217	270295	519469	389327	124958	32.0959
pos	TG(16:1_14:0_16:0)	TG	16:1_14:0_16:0	(16:1_14:0_16:0)	776.689	C49H92O6		40.055	+NH4	0.72344	0.391542	0.536298	0.117932	0.622448	0.139672	1.16064	0.660852	0.8604	0.708564	A	A	A	A			4.82665e+07	3.41133e+07	5.45088e+07	4.56295e+07	1.04504e+07	22.9026	6.14802e+07	3.82952e+07	7.25155e+07	5.74303e+07	1.74659e+07	30.4124	6.63906e+07	8.34806e+07	7.18124e+07	7.38945e+07	8.73317e+06	11.8184	2.89201e+07	5.48154e+07	4.27841e+07	4.21732e+07	1.29585e+07	30.7268
pos	PG(18:4_16:1)	PG	18:4_16:1	(18:4_16:1)	740.463	C40H69O10N0P1		12.954	+H	0.900142	0.717765	1.312	0.284915	1.10646	0.848598	0.843336	0.708592	1.22921	0.708776	B	-	-	-			1.31209e+06	5.73085e+07	7.32182e+07	4.39462e+07	3.77695e+07	85.9447	6.3048e+07	5.93101e+07	9.38608e+07	7.2073e+07	1.89611e+07	26.3082	6.55018e+07	1.112e+08	9.1173e+07	8.92915e+07	2.29069e+07	25.6541	8.45218e+07	8.33055e+07	7.69918e+07	8.16063e+07	4.04234e+06	4.95346
pos	TG(18:4_14:0_16:1)	TG	18:4_14:0_16:1	(18:4_14:0_16:1)	796.658	C51H88O6		38.427	+H	0.800377	0.334332	0.709984	0.0988834	0.72651	0.142409	1.02328	0.912621	0.907711	0.70991	A	A	-	-			1.64125e+07	5.99978e+06	6.89927e+06	9.77052e+06	5.76969e+06	59.052	7.29198e+06	7.26951e+06	1.2521e+07	9.02749e+06	3.02547e+06	33.514	1.15755e+07	8.81678e+06	1.11326e+07	1.05083e+07	1.48154e+06	14.0988	926605	5.77425e+06	5.91846e+06	4.20644e+06	2.84133e+06	67.5473
pos	TG(15:0_16:1_20:4)	TG	15:0_16:1_20:4	(15:0_16:1_20:4)	838.705	C54H94O6		40.977	+H	0.703446	0.366882	0.586311	0.155313	0.600425	0.171463	1.02407	0.9395	0.853548	0.710633	A	-	-	-			2.18188e+07	1.45049e+08	1.45254e+08	1.0404e+08	7.12061e+07	68.4408	1.76704e+08	1.52019e+08	2.06941e+08	1.78555e+08	2.75075e+07	15.4056	2.46176e+08	2.78921e+08	2.4004e+08	2.55045e+08	2.09029e+07	8.19577	1.08669e+08	1.27432e+08	1.98225e+08	1.44775e+08	4.72301e+07	32.6231
pos	dMePE(20:0_14:4)	dMePE	20:0_14:4	(20:0_14:4)	739.515	C41H74O8N1P1		17.347	+H	1.96361	0.347998	1.98837	0.0240143	1.61097	0.193969	0.810193	0.378151	0.820412	0.711222	-	-	-	B			1.3519e+08	2.4219e+06	2.71614e+06	4.67762e+07	7.65692e+07	163.693	1.7213e+06	3.24787e+06	3.84581e+06	2.93832e+06	1.09556e+06	37.2852	2.51094e+06	3.80916e+06	3.67288e+06	3.331e+06	713451	21.4185	3.05249e+06	2.62193e+06	3.98402e+06	3.21948e+06	696231	21.6256
pos	TG(20:1_18:1_18:1)	TG	20:1_18:1_18:1	(20:1_18:1_18:1)	912.815	C59H108O6		45.582	+NH4	0.968689	0.937729	0.623417	0.396095	1.07095	0.864963	1.71787	0.196563	1.10557	0.717991	A	-	-	-			607425	1.25061e+07	1.40274e+07	9.04699e+06	7.34836e+06	81.2243	6.02586e+06	8.08829e+06	8.60198e+06	7.57204e+06	1.36345e+06	18.0064	1.5772e+07	9.79425e+06	8.4636e+06	1.13433e+07	3.89266e+06	34.3169	8.87657e+06	9.80122e+06	1.08221e+07	9.83328e+06	973141	9.89641
pos	LPC(18:3)	LPC	18:03:00	(18:3)	517.317	C26H48O7N1P1		8.6	+H	1.44899	0.224571	1.57237	0.184424	1.33856	0.0519171	0.851304	0.510128	0.923788	0.721134	-	B	B	-			2.47517e+07	6.402e+06	1.03531e+07	1.38356e+07	9.65782e+06	69.8042	7.76194e+06	1.69209e+07	2.46079e+07	1.64302e+07	8.4337e+06	51.3303	1.46734e+07	1.2531e+07	1.38905e+07	1.36983e+07	1.08404e+06	7.9137	1.30959e+07	6.66353e+06	2.21376e+07	1.39657e+07	7.77362e+06	55.6623
pos	TG(18:4_16:1_16:1)	TG	18:4_16:1_16:1	(18:4_16:1_16:1)	822.674	C53H90O6		38.638	+H	0.773744	0.473453	0.646667	0.191967	0.664578	0.210367	1.0277	0.941462	0.858913	0.72357	-	A	A	-			9.58603e+06	2.96096e+06	3.44907e+06	5.33202e+06	3.69215e+06	69.245	2.83941e+06	3.86944e+06	5.11653e+06	3.94179e+06	1.14028e+06	28.928	4.59787e+06	4.98265e+06	3.02222e+06	4.20091e+06	1.03875e+06	24.7268	1.93993e+06	1.5999e+06	2.88315e+06	2.14099e+06	664835	31.0526
pos	TG(22:0_18:2_18:2)	TG	22:0_18:2_18:2	(22:0_18:2_18:2)	938.83	C61H110O6		46.877	+NH4	0.8516	0.683047	0.786815	0.511657	0.753793	0.475238	0.958031	0.860676	0.885149	0.72386	A	-	-	-			2.53413e+06	2.68922e+07	2.09003e+07	1.67755e+07	1.26921e+07	75.6583	2.20805e+07	2.52667e+07	2.80333e+07	2.51268e+07	2.97886e+06	11.8553	2.75773e+07	4.72195e+07	3.87846e+07	3.78605e+07	9.85364e+06	26.0262	3.00246e+07	3.02581e+07	3.13472e+07	3.05433e+07	705913	2.31119
pos	TG(6:0_10:3_18:3)	TG	6:0_10:3_18:3	(6:0_10:3_18:3)	598.423	C37H58O6		12.594	+Na	2.01203	0.227795	1.67748	0.0235252	1.71022	0.324545	1.01952	0.958135	0.849999	0.728762	B	B	B	B			7.74291e+06	664867	591345	2.99971e+06	4.1079e+06	136.943	1.71117e+06	1.19253e+06	1.18691e+06	1.36354e+06	301076	22.0805	191360	2.62056e+06	4.13099e+06	2.3143e+06	1.98759e+06	85.8829	125643	16631.9	24184.1	55486.3	60874.6	109.711
pos	DG(18:3_16:0)	DG	18:3_16:0	(18:3_16:0)	590.491	C37H66O5		29.736	+Na	1.30027	0.410019	1.47403	0.113638	1.42468	0.138926	0.966522	0.855813	1.09569	0.729816	A	A	A	A			1.64132e+06	1.24108e+07	1.65499e+07	1.02007e+07	7.69609e+06	75.447	2.21277e+07	1.46141e+07	2.28731e+07	1.98716e+07	4.56842e+06	22.9897	2.01509e+07	3.75125e+07	1.86558e+06	1.9843e+07	1.78255e+07	89.8325	1.83416e+07	2.12662e+07	2.14254e+07	2.03444e+07	1.73628e+06	8.53442
pos	TG(18:0_18:1_20:4)	TG	18:0_18:1_20:4	(18:0_18:1_20:4)	908.783	C59H104O6		45.832	+H	0.842063	0.6646	0.497472	0.0346637	0.689703	0.363926	1.38642	0.555864	0.819063	0.730242	A	A	B	-			6.33671e+06	1.39433e+07	1.70365e+07	1.24389e+07	5.50627e+06	44.2667	1.86273e+07	1.21614e+07	2.46056e+07	1.84648e+07	6.22368e+06	33.7057	2.2015e+07	2.17146e+07	2.70262e+07	2.35853e+07	2.98375e+06	12.6509	1.19456e+07	1.0892e+07	1.43924e+07	1.241e+07	1.79581e+06	14.4707
neg	DGDG(10:0_26:5)	DGDG	1_1_1900 12:05:00 PM	(10:0_26:5)	938.597	C51H86O15		17.966	+HCOO	1.61959	0.324445	3.19406	0.0382422	1.83781	0.122071	0.575385	0.103257	1.13474	0.731921	-	-	C	-			4.56657e+07	5.17781e+06	3.94184e+06	1.82618e+07	2.37405e+07	130.001	3.30134e+06	8.60451e+06	1.9227e+06	4.60952e+06	3.52777e+06	76.5322	3.26537e+06	2.76997e+06	3.68247e+06	3.23927e+06	456812	14.1023	5.85138e+06	4.70579e+06	4.78558e+06	5.11425e+06	639618	12.5066
pos	PS(24:0_18:3)	PS	24:0_18:3	(24:0_18:3)	869.615	C48H88O10N1P1		35.746	+H	3.29727	0.273267	2.45665	0.346776	4.2432	0.250528	1.72723	0.501331	1.28688	0.732412	A	B	A	A			403020	8346.15	10462.7	140610	227257	161.622	1.14167e+06	8360.03	12061	387364	653251	168.64	1.27192e+06	10248.7	12262.2	431478	727847	168.687	9218.03	7426.47	7771.5	8138.67	950.543	11.6794
pos	TG(18:3_18:2_20:4)	TG	18:3_18:2_20:4	(18:3_18:2_20:4)	900.721	C59H96O6		39.076	+H	0.900233	0.619223	0.931409	0.698886	1.01804	0.955153	1.09301	0.795525	1.13086	0.73247	A	A	A	A			2.62905e+06	2.81082e+06	2.98457e+06	2.80814e+06	177775	6.33068	2.43305e+06	2.78809e+06	4.69783e+06	3.30632e+06	1.21809e+06	36.8411	2.44817e+06	5.5704e+06	3.38998e+06	3.80285e+06	1.60154e+06	42.1141	4.76752e+06	5.1563e+06	4.70766e+06	4.87716e+06	243589	4.99449
pos	Cer(d18:1+hO_29:6)	Cer	d18:1+hO_29:6	(d18:1+hO_29:6)	723.617	C47H81O4N1		35.741	+H-H2O	2.62834	0.599864	3.71457	0.529082	1.5271	0.758821	0.411113	0.615114	0.581015	0.734663	B	B	-	-			5.89223e+06	2.13454e+09	2.29237e+09	1.4776e+09	1.27698e+09	86.4224	2.38057e+09	1.91252e+09	2.20337e+09	2.16549e+09	2.36311e+08	10.9126	3.00378e+09	3.40672e+09	3.24128e+09	3.21726e+09	2.02542e+08	6.29549	2.11301e+09	1.95321e+09	2.47385e+09	2.18002e+09	2.66713e+08	12.2344
pos	DGDG(20:3_20:6)	DGDG	20:3_20:6	(20:3_20:6)	986.597	C55H86O15		19.87	+H	1.25301	0.277709	1.80208	0.0111597	1.16218	0.506807	0.644906	0.0731719	0.927506	0.736172	A	-	A	-			2.02463e+06	3.22755e+07	3.17649e+07	2.20217e+07	1.73198e+07	78.649	2.89384e+07	3.04715e+07	2.15347e+07	2.69815e+07	4.77894e+06	17.7119	2.9506e+07	1.85076e+07	1.57324e+07	2.12487e+07	7.28447e+06	34.282	2.58668e+07	3.01036e+07	2.123e+07	2.57334e+07	4.43832e+06	17.2473
pos	TG(18:3_18:3_22:6)	TG	18:3_18:3_22:6	(18:3_18:3_22:6)	922.705	C61H94O6		36.959	+H	1.5159	0.361333	1.5215	0.0764427	1.34038	0.175524	0.880956	0.499323	0.884209	0.738121	-	A	-	-			3.29022e+06	6.8152e+08	6.9733e+08	4.60713e+08	3.96219e+08	86.0012	9.33628e+08	9.4017e+08	1.31632e+09	1.06337e+09	2.19084e+08	20.6027	5.20803e+08	1.55431e+09	1.16228e+09	1.07913e+09	5.21747e+08	48.3488	7.6417e+08	7.19376e+08	7.55582e+08	7.46376e+08	2.37733e+07	3.18516
pos	TG(18:0_18:1_18:1)	TG	18:0_18:1_18:1	(18:0_18:1_18:1)	886.799	C57H106O6		45.803	+NH4	0.844768	0.609035	0.39447	0.0729091	0.933969	0.79317	2.36765	0.0663696	1.10559	0.753932	A	A	A	A			9.72261e+06	1.0557e+07	1.13815e+07	1.05537e+07	829437	7.85921	6.32099e+06	5.97122e+06	9.27908e+06	7.19043e+06	1.81726e+06	25.2733	1.20932e+07	9.6672e+06	8.16453e+06	9.97498e+06	1.98235e+06	19.8732	1.06945e+07	7.52656e+06	9.2682e+06	9.16307e+06	1.58656e+06	17.3147
pos	TG(8:0_10:0_10:0)	TG	8:0_10:0_10:0	(8:0_10:0_10:0)	526.423	C31H58O6		22.487	+NH4	3.69944	0.36617	1.96731	0.625646	2.79865	0.288652	1.42258	0.708584	0.756506	0.754935	-	A	A	A			3.85802e+06	13211.3	223809	1.36501e+06	2.16158e+06	158.355	407488	537104	393997	446196	79016.7	17.709	682800	1.27102e+06	719757	891192	329458	36.9682	39914.6	29203	13386.3	27501.3	13345.8	48.5277
pos	TG(18:4_10:2_12:2)	TG	18:4_10:2_12:2	(18:4_10:2_12:2)	678.486	C43H66O6		16.399	+Na	1.50306	0.466152	1.38323	0.427761	1.29572	0.582941	0.936739	0.847996	0.862054	0.754989	A	A	B	-			4.96553e+07	8.30455e+07	1.05066e+08	7.92557e+07	2.78991e+07	35.2014	5.71751e+07	4.92514e+07	6.69643e+07	5.7797e+07	8.8728e+06	15.3517	1.55178e+08	8.05365e+07	6.50026e+07	1.00239e+08	4.82082e+07	48.0933	1.12138e+08	7.30587e+07	1.43503e+08	1.09566e+08	3.52923e+07	32.2109
pos	PA(16:1_18:3)	PA	16:1_18:3	(16:1_18:3)	668.442	C37H65O8N0P1		27.451	+NH4	0.754205	0.527298	0.977198	0.972241	0.870081	0.785844	0.890384	0.870245	1.15364	0.755871	A	A	B	A			1.69237e+06	840825	1.14817e+06	1.22712e+06	431230	35.1415	1.12559e+06	1.24546e+06	3.73951e+06	2.03685e+06	1.47577e+06	72.4532	2.13787e+06	1.86405e+06	1.55848e+06	1.85346e+06	289840	15.6378	1.49865e+06	1.06709e+06	2.18552e+06	1.58375e+06	564050	35.6148
pos	TG(16:0_18:1_18:2)	TG	16:0_18:1_18:2	(16:0_18:1_18:2)	856.752	C55H100O6		41.956	+NH4	0.829253	0.1777	0.653058	0.113013	0.790894	0.11173	1.21106	0.423944	0.953742	0.757022	A	A	A	A			3.35711e+07	1.46151e+07	1.35627e+07	2.0583e+07	1.12604e+07	54.7072	1.4421e+07	1.38778e+07	2.01569e+07	1.61519e+07	3.47903e+06	21.5395	2.48395e+07	3.16144e+07	2.11297e+07	2.58612e+07	5.3165e+06	20.5578	1.79388e+07	1.66792e+07	2.41365e+07	1.95848e+07	3.99185e+06	20.3824
pos	TG(16:0_16:1_16:0)	TG	16:0_16:1_16:0	(16:0_16:1_16:0)	804.721	C51H96O6		42.005	+NH4	0.740046	0.439527	0.562165	0.0708644	0.649006	0.111889	1.15448	0.541274	0.876981	0.763189	A	A	A	A			4.41416e+07	738389	1.10155e+06	1.53272e+07	2.49547e+07	162.813	609465	964845	1.30536e+06	959890	347975	36.2515	971573	1.65329e+06	1.32648e+06	1.31712e+06	340957	25.8866	758673	475707	875016	703132	205367	29.2075
pos	Cer(d18:2_24:0+O)	Cer	d18:2_24:0+O	(d18:2_24:0+O)	663.617	C42H81O4N1		32.4	+H	0.789268	0.131907	1.13145	0.235647	0.832412	0.286906	0.735705	0.0959264	1.05466	0.767938	B	B	B	B			1.07318e+06	2.72448e+06	2.73689e+06	2.17818e+06	956980	43.9347	2.22279e+06	2.82561e+06	4.72514e+06	3.25785e+06	1.30597e+06	40.0869	3.46893e+06	3.60588e+06	2.92193e+06	3.33225e+06	361884	10.8601	3.20713e+06	3.14168e+06	3.6039e+06	3.31757e+06	250119	7.53923
pos	PC(20:1_18:3)	PC	20:1_18:3	(20:1_18:3)	809.593	C46H84O8N1P1		27.924	+H	1.13995	0.674394	1.47323	0.0722187	1.0497	0.792516	0.712516	0.0205343	0.920833	0.768075	-	B	-	-			4.99138e+06	154359	239723	1.79515e+06	2.76834e+06	154.212	392621	132164	224844	249876	132021	52.8344	382070	338699	286700	335823	47749.9	14.2188	216263	192174	188807	199081	14974.8	7.52196
pos	TG(18:1_18:1_22:6)	TG	18:1_18:1_22:6	(18:1_18:1_22:6)	930.768	C61H102O6		42.357	+H	0.842551	0.560478	0.935883	0.785586	0.902529	0.639616	0.964362	0.828467	1.07119	0.768785	A	-	-	-			4.86692e+06	5.26981e+06	6.51712e+06	5.55129e+06	860355	15.4983	5.60721e+06	4.11385e+06	7.0394e+06	5.58682e+06	1.46288e+06	26.1846	5.92848e+06	6.45329e+06	4.30148e+06	5.56108e+06	1.12197e+06	20.1753	3.40178e+06	4.67681e+06	4.19491e+06	4.09117e+06	643813	15.7367
pos	TG(18:0_18:1_18:3)	TG	18:0_18:1_18:3	(18:0_18:1_18:3)	882.768	C57H102O6		45.971	+H	1.08626	0.797966	0.680447	0.0360768	1.23431	0.602098	1.81397	0.281869	1.1363	0.774999	A	A	-	A			5.99933e+06	1.52185e+07	1.33168e+07	1.15116e+07	4.8675e+06	42.2836	9.18122e+06	1.44906e+07	1.75184e+07	1.37301e+07	4.22031e+06	30.7377	1.73429e+07	1.47543e+07	1.46371e+07	1.55781e+07	1.52951e+06	9.81832	1.95067e+07	1.6428e+07	1.75166e+07	1.78171e+07	1.5612e+06	8.76241
pos	PA(16:0_22:4)	PA	16:0_22:4	(16:0_22:4)	724.504	C41H73O8N0P1		20.833	+NH4	1.00845	0.967938	1.47094	0.0567458	1.06346	0.68186	0.722983	0.0340404	1.05455	0.775313	-	-	-	B			611569	2.91463e+07	5.08603e+07	2.68727e+07	2.52014e+07	93.7806	2.71409e+07	5.23193e+07	8.15752e+07	5.36785e+07	2.72426e+07	50.7515	6.21677e+07	4.30595e+07	5.64099e+07	5.3879e+07	9.80229e+06	18.1932	3.30215e+07	2.53274e+07	7.22182e+07	4.35224e+07	2.51473e+07	57.7803
pos	DG(16:0_11:2)	DG	16:0_11:2	(16:0_11:2)	494.397	C30H54O5		12.635	+H	1.26721	0.557482	1.94078	0.158506	1.3767	0.279646	0.709356	0.331411	1.0864	0.775418	-	-	B	-			7.40435e+06	6.31213e+06	8.05926e+06	7.25858e+06	882638	12.1599	6.91672e+06	3.27912e+06	7.21922e+06	5.80502e+06	2.19272e+06	37.7728	1.05648e+07	8.79513e+06	9.77018e+06	9.71005e+06	886393	9.12861	4.3842e+06	4.9248e+06	7.52151e+06	5.61017e+06	1.67719e+06	29.8956
pos	PI(16:0_18:2)	PI	16:0_18:2	(16:0_18:2)	834.526	C43H79O13N0P1		20.516	+NH4	1.16104	0.648755	1.23121	0.473905	1.25728	0.125824	1.02118	0.92964	1.08289	0.777191	A	A	A	A			5.01898e+07	2.22009e+06	3.06443e+06	1.84915e+07	2.74549e+07	148.473	2.23957e+06	2.35749e+06	4.21757e+06	2.93821e+06	1.10953e+06	37.762	3.04278e+06	3.20077e+06	2.27627e+06	2.83994e+06	494502	17.4124	950886	2.56989e+06	3.0947e+06	2.20516e+06	1.11748e+06	50.6756
pos	TG(25:0_16:1_16:1)	TG	25:0_16:1_16:1	(25:0_16:1_16:1)	928.846	C60H112O6		49.617	+NH4	1.20313	0.646809	1.02977	0.903789	1.08066	0.782019	1.04941	0.838093	0.8982	0.780171	B	-	-	-			2.99694e+06	820253	1.95016e+06	1.92245e+06	1.08861e+06	56.6261	281093	281379	538776	367083	148691	40.5061	564431	446994	610538	540654	84324.9	15.5968	676722	871989	864811	804507	110724	13.7629
pos	TG(25:0_16:0_16:0)	TG	25:0_16:0_16:0	(25:0_16:0_16:0)	932.877	C60H116O6		52.234	+NH4	1.31956	0.430813	1.30722	0.284993	1.50726	0.453175	1.15302	0.753448	1.14225	0.781773	A	B	-	A			1.95412e+06	2.55395e+06	4.05071e+06	2.85293e+06	1.0798e+06	37.8489	4.11252e+06	3.87903e+06	6.58362e+06	4.85839e+06	1.49865e+06	30.8466	2.63673e+06	1.8005e+06	4.35943e+06	2.93222e+06	1.3048e+06	44.4989	221281	32475.8	255706	169821	120183	70.7706
pos	TG(16:1_17:1_18:1)	TG	16:1_17:1_18:1	(16:1_17:1_18:1)	842.736	C54H98O6		41.142	+NH4	0.828251	0.669865	0.671509	0.380864	0.755057	0.49057	1.12442	0.540366	0.911628	0.7848	A	-	-	-			9.12332e+06	1.46491e+07	1.72961e+07	1.36895e+07	4.17004e+06	30.4616	1.84301e+07	1.51648e+07	2.52396e+07	1.96115e+07	5.14023e+06	26.2103	2.54155e+07	2.39352e+07	2.05347e+07	2.32952e+07	2.50257e+06	10.7429	1.44505e+07	1.19203e+07	1.8639e+07	1.50032e+07	3.39326e+06	22.6169
pos	TG(18:0_18:0_20:3)	TG	18:0_18:0_20:3	(18:0_18:0_20:3)	912.815	C59H108O6		50.268	+H	1.49482	0.331518	0.905062	0.649915	1.34395	0.437119	1.48493	0.329066	0.899068	0.784852	A	A	A	-			3.12276e+06	4.43687e+07	3.55438e+07	2.76784e+07	2.17188e+07	78.4682	3.27943e+07	3.47218e+07	4.22675e+07	3.65945e+07	5.00655e+06	13.6811	4.80966e+07	4.90281e+07	4.83279e+07	4.84842e+07	485046	1.00042	3.38919e+07	2.36338e+07	3.35628e+07	3.03629e+07	5.82986e+06	19.2006
pos	TG(16:1_16:1_16:0)	TG	16:1_16:1_16:0	(16:1_16:1_16:0)	802.705	C51H94O6		40.251	+NH4	0.668362	0.34579	0.600619	0.211765	0.60019	0.20643	0.999284	0.997937	0.898001	0.788125	A	A	A	A			5.50879e+07	2.61059e+06	4.19935e+06	2.06326e+07	2.98497e+07	144.673	4.13314e+06	2.68262e+06	4.48052e+06	3.76543e+06	953688	25.3275	5.7284e+06	6.21459e+06	5.17786e+06	5.70695e+06	518696	9.08884	2.78963e+06	3.15261e+06	2.99056e+06	2.9776e+06	181839	6.10689
pos	TG(16:0_16:0_16:0)	TG	16:0_16:0_16:0	(16:0_16:0_16:0)	806.736	C51H98O6		43.663	+Na	2.32517	0.23278	1.56766	0.344303	2.04767	0.20684	1.30619	0.550174	0.880651	0.790117	A	A	A	A			5.50809e+06	5.92574e+06	9.26771e+06	6.90051e+06	2.06066e+06	29.8625	7.15648e+06	6.0884e+06	8.24708e+06	7.16399e+06	1.07936e+06	15.0664	1.15116e+07	6.49615e+06	7.80689e+06	8.60488e+06	2.60121e+06	30.2295	5.79898e+06	6.59806e+06	6.80975e+06	6.40227e+06	533073	8.32632
pos	TG(18:3_18:3_20:5)	TG	18:3_18:3_20:5	(18:3_18:3_20:5)	896.689	C59H92O6		36.632	+H	1.04318	0.834954	1.22379	0.104499	0.987955	0.830492	0.807289	0.0850251	0.94706	0.793167	-	A	-	-			6.82782e+06	6.20295e+07	4.35028e+07	3.74534e+07	2.80936e+07	75.0096	3.85836e+07	3.34862e+07	5.45544e+07	4.22081e+07	1.09918e+07	26.042	6.48518e+07	1.01938e+08	8.53618e+07	8.40506e+07	1.85779e+07	22.1033	5.63319e+07	5.08586e+07	6.4563e+07	5.72511e+07	6.89829e+06	12.0492
pos	DG(32:1p)	DG	32:1p	(32:1p)	550.496	C35H66O4		30.21	+Na	1.38309	0.375931	1.49918	0.136966	1.28498	0.207456	0.857122	0.418225	0.929067	0.795846	C	-	-	-			2.04475e+06	2.31305e+06	898833	1.75221e+06	751127	42.8673	980220	515574	1.98522e+06	1.16034e+06	751196	64.7394	1.23798e+06	2.48445e+06	2.32375e+06	2.01539e+06	678040	33.643	1.70604e+06	525798	1.57639e+06	1.26941e+06	647241	50.9876
pos	TG(18:1_18:1_16:0)	TG	18:1_18:1_16:0	(18:1_18:1_16:0)	858.768	C55H102O6		43.605	+NH4	0.58688	0.357168	0.433352	0.243265	0.546879	0.324034	1.26197	0.500149	0.931841	0.797059	A	A	A	A			3.01742e+07	1.63687e+07	1.07018e+07	1.90815e+07	1.00157e+07	52.4888	2.22004e+07	2.37163e+07	3.4666e+07	2.68609e+07	6.80175e+06	25.3221	1.32263e+07	4.02256e+07	2.57877e+07	2.64132e+07	1.35105e+07	51.1505	1.83984e+07	2.08886e+07	2.08609e+07	2.00493e+07	1.42976e+06	7.1312
pos	TG(15:0_16:1_18:3)	TG	15:0_16:1_18:3	(15:0_16:1_18:3)	812.689	C52H92O6		40.904	+H	1.10503	0.807701	0.717156	0.221116	0.983071	0.958585	1.37079	0.461649	0.889636	0.80602	A	A	-	A			1.27821e+07	969820	1.1084e+06	4.95343e+06	6.78016e+06	136.878	912171	988483	1.48792e+06	1.12952e+06	312713	27.6854	1.33421e+06	1.59638e+06	1.3989e+06	1.44316e+06	136574	9.46356	886886	752500	1.08789e+06	909092	168794	18.5673
pos	MGDG(18:3_20:2)	MGDG	18:3_20:2	(18:3_20:2)	804.575	C47H80O10		25.253	+Na	1.01752	0.935807	1.79235	0.0507005	0.951902	0.826586	0.531092	0.0421268	0.935508	0.806998	A	A	A	B			2.90831e+07	3.62348e+07	2.9913e+07	3.17436e+07	3.91152e+06	12.3222	2.33146e+07	3.2969e+07	3.33143e+07	2.9866e+07	5.6763e+06	19.0059	3.65603e+07	3.37081e+07	3.18052e+07	3.40245e+07	2.39326e+06	7.03393	2.73122e+07	2.47362e+07	3.21225e+07	2.8057e+07	3.74905e+06	13.3623
pos	TG(18:3_18:3_20:3)	TG	18:3_18:3_20:3	(18:3_18:3_20:3)	900.721	C59H96O6		37.014	+Na	1.37623	0.366755	1.40174	0.26024	1.27966	0.302308	0.912904	0.730038	0.929827	0.814363	A	A	A	A			3.36133e+06	4.48689e+07	3.78759e+06	1.73393e+07	2.38423e+07	137.505	2.87758e+07	1.30152e+07	2.22919e+06	1.46734e+07	1.33508e+07	90.9862	800187	4.43037e+06	1.54607e+07	6.89708e+06	7.63519e+06	110.702	1.47041e+08	1.9621e+08	4.0341e+07	1.27864e+08	7.96845e+07	62.3197
pos	TG(16:1_16:1_16:1)	TG	16:1_16:1_16:1	(16:1_16:1_16:1)	800.689	C51H92O6		38.623	+NH4	0.782456	0.526857	0.647157	0.266526	0.721348	0.316519	1.11464	0.709786	0.921902	0.818448	A	A	A	-			1.29563e+07	3.83364e+07	2.26721e+08	9.26714e+07	1.16782e+08	126.018	1.38836e+08	3.05807e+08	5.13084e+07	1.65317e+08	1.29299e+08	78.2129	3.41913e+08	2.04397e+08	2.73808e+08	2.73373e+08	6.87589e+07	25.1521	3.02984e+08	1.64158e+08	4.14184e+08	2.93775e+08	1.25267e+08	42.6404
pos	MGDG(16:1_16:3)	MGDG	16:1_16:3	(16:1_16:3)	722.497	C41H70O10		17.407	+Na	0.885826	0.67923	0.987719	0.961214	0.9304	0.75308	0.941969	0.729838	1.05032	0.823407	A	A	A	A			735744	1.14586e+08	1.38491e+08	8.46045e+07	7.36094e+07	87.0041	1.39303e+08	1.64312e+08	4.58791e+08	2.54136e+08	1.77678e+08	69.9145	2.96501e+08	2.60709e+08	2.14812e+08	2.57341e+08	4.09482e+07	15.9121	1.99279e+08	1.41631e+08	2.84577e+08	2.08496e+08	7.19173e+07	34.4934
pos	DG(20:2_18:2)	DG	20:2_18:2	(20:2_18:2)	644.538	C41H72O5		31.569	+NH4	1.12834	0.775564	1.10657	0.777071	1.05109	0.887717	0.949861	0.810163	0.931534	0.827221	-	B	-	B			2.47434e+06	1.34464e+07	2.51276e+07	1.36828e+07	1.13285e+07	82.7935	1.1053e+07	1.06607e+07	1.97865e+07	1.38334e+07	5.15928e+06	37.2959	2.27787e+07	1.8572e+07	1.54709e+07	1.89405e+07	3.66783e+06	19.365	1.21182e+07	1.00942e+07	2.19292e+07	1.47139e+07	6.33011e+06	43.0215
pos	PS(24:0_18:2)	PS	24:0_18:2	(24:0_18:2)	871.63	C48H90O10N1P1		36.962	+H	3.04083	0.445619	1.58978	0.561588	2.47492	0.265432	1.55676	0.530382	0.813896	0.828001	B	-	-	A			2.17231e+06	4183.33	5139.82	727212	1.25149e+06	172.095	690052	4788.67	7531.54	234124	394847	168.649	825793	8140.86	7942.46	280625	472129	168.242	5591.81	6514.3	5826.29	5977.47	479.468	8.02125
pos	TG(25:0_16:0_16:1)	TG	25:0_16:0_16:1	(25:0_16:0_16:1)	930.861	C60H114O6		50.796	+NH4	0.929521	0.881787	0.653207	0.0656319	1.0313	0.824499	1.57883	0.0177496	1.1095	0.828839	A	B	-	A			5.75742e+06	5.99978e+06	6.89927e+06	6.21882e+06	601614	9.67408	7.29198e+06	7.72453e+06	8.3133e+06	7.7766e+06	512643	6.59212	9.40487e+06	8.81678e+06	1.11326e+07	9.78473e+06	1.20371e+06	12.3019	6.0072e+06	5.77425e+06	5.91846e+06	5.89997e+06	117568	1.99269
pos	PS(18:1_22:2)	PS	18:1_22:2	(18:1_22:2)	841.583	C46H84O10N1P1		15.702	+H	1.60407	0.561482	1.07777	0.916636	1.39012	0.314199	1.28981	0.689525	0.866621	0.833304	-	B	-	B			7.36209e+06	1.00758e+07	1.04232e+07	9.28702e+06	1.67606e+06	18.0474	7.23356e+06	1.17033e+07	1.46511e+07	1.1196e+07	3.73468e+06	33.3573	7.05582e+06	1.32368e+07	1.06726e+07	1.03217e+07	3.10537e+06	30.0857	9.32121e+06	7.96443e+06	9.86536e+06	9.05033e+06	978986	10.8171
pos	TG(24:1_18:3_20:5)	TG	24:1_18:3_20:5	(24:1_18:3_20:5)	984.815	C65H108O6		44.866	+H	1.42387	0.313516	1.29747	0.108097	1.30796	0.556282	1.00808	0.983329	0.918596	0.841637	-	A	-	-			1.32104e+06	1.06911e+06	2.29475e+06	1.56163e+06	647275	41.4487	389052	975340	1.99437e+06	1.11959e+06	812321	72.5555	344326	2.80568e+06	3.19004e+06	2.11335e+06	1.54403e+06	73.0606	6.06645e+06	5.9005e+06	3.07539e+06	5.01411e+06	1.68103e+06	33.526
pos	DGDG(18:3_20:3)	DGDG	18:3_20:3	(18:3_20:3)	964.612	C53H88O15		19.831	+Na	1.30678	0.185265	2.03165	0.0472522	1.26195	0.189463	0.621145	0.0763785	0.965692	0.841716	A	A	A	A			6.89994e+07	1.08211e+06	1.3493e+06	2.38103e+07	3.91352e+07	164.363	864141	796706	1.10521e+06	922019	162192	17.591	1.33175e+06	1.4123e+06	1.22121e+06	1.32175e+06	95935.6	7.2582	891470	802534	1.22326e+06	972421	221737	22.8026
pos	TG(18:1_18:1_22:0)	TG	18:1_18:1_22:0	(18:1_18:1_22:0)	942.861	C61H114O6		50.205	+NH4	0.9246	0.702503	0.636432	0.0956404	0.961956	0.752769	1.51148	0.119761	1.0404	0.845014	A	A	B	A			5.0895e+06	435522	301022	1.94201e+06	2.72663e+06	140.402	162221	220534	240346	207700	40613.1	19.5537	396677	228164	193666	272836	108628	39.8143	332686	217559	259612	269953	58256	21.5801
pos	TG(16:0_16:1_17:0)	TG	16:0_16:1_17:0	(16:0_16:1_17:0)	818.736	C52H98O6		42.764	+NH4	0.696213	0.322743	0.575333	0.115357	0.649831	0.164939	1.12949	0.602424	0.933378	0.846893	A	A	B	A			3.0575e+07	1.60476e+09	1.23486e+09	9.5673e+08	8.23121e+08	86.0349	1.14355e+09	1.21981e+09	1.67615e+09	1.3465e+09	2.88017e+08	21.3899	1.75128e+09	2.12469e+09	1.6488e+09	1.84159e+09	2.5047e+08	13.6008	1.72029e+09	1.41492e+09	1.53509e+09	1.55677e+09	1.53835e+08	9.8817
pos	TG(30:1_11:2_11:2)	TG	30:1_11:2_11:2	(30:1_11:2_11:2)	852.721	C55H96O6		35.233	+H	1.39374	0.359881	1.40216	0.365471	1.50916	0.384591	1.07631	0.860489	1.08282	0.847906	-	-	-	A			1.1883e+07	45613.5	50021.6	3.99288e+06	6.83305e+06	171.131	110946	82555.4	63528.9	85676.9	23862.3	27.8515	165892	194748	198226	186288	17749.5	9.52799	35731	3819.02	1878.67	13809.6	19009.3	137.653
pos	TG(16:1_16:1_15:0)	TG	16:1_16:1_15:0	(16:1_16:1_15:0)	788.689	C50H92O6		39.327	+NH4	0.687042	0.415523	0.616015	0.274111	0.63204	0.255417	1.02601	0.940751	0.919944	0.848665	A	A	A	-			2.47949e+07	1.88655e+06	3.45254e+06	1.00447e+07	1.27981e+07	127.412	18407.2	981711	2.63057e+06	1.21023e+06	1.32099e+06	109.152	118240	37467.8	26737.3	60815.1	50020.2	82.2496	15878.7	95819.6	236077	115925	111468	96.1548
pos	TG(15:0_14:0_16:1)	TG	15:0_14:0_16:1	(15:0_14:0_16:1)	762.674	C48H90O6		39.107	+NH4	0.627327	0.299246	0.44746	0.0771345	0.681657	0.220639	1.52339	0.196272	1.08661	0.849897	A	-	-	-			2.1545e+07	1.60881e+06	1.70099e+06	8.28492e+06	1.14836e+07	138.609	1.39239e+06	1.35732e+06	1.73507e+06	1.49493e+06	208705	13.9609	1.6977e+06	1.71779e+06	1.66773e+06	1.69441e+06	25190.5	1.48669	892296	1.7825e+06	580800	1.0852e+06	623644	57.4681
pos	TG(18:4_15:0_16:1)	TG	18:4_15:0_16:1	(18:4_15:0_16:1)	810.674	C52H90O6		39.253	+H	0.691171	0.379631	0.576558	0.158609	0.631722	0.248049	1.09568	0.82328	0.913988	0.856011	A	-	-	-			1.78634e+07	717621	1.12943e+06	6.57015e+06	9.78242e+06	148.892	1.14732e+06	1.04225e+06	1.70559e+06	1.29838e+06	356542	27.4604	1.07427e+06	1.04221e+06	1.10245e+06	1.07298e+06	30139.7	2.80897	803012	614960	930181	782718	158587	20.2611
pos	TG(16:1_16:1_14:0)	TG	16:1_16:1_14:0	(16:1_16:1_14:0)	774.674	C49H90O6		38.455	+NH4	0.61631	0.342032	0.594236	0.275559	0.668041	0.324071	1.1242	0.738405	1.08394	0.85657	A	A	A	A			2.30832e+07	1.09493e+06	1.47672e+06	8.55161e+06	1.25862e+07	147.179	660719	1.84124e+06	966197	1.15605e+06	612732	53.0022	697774	806329	811800	771968	64311.6	8.33087	2.06526e+06	1.57973e+06	1.37381e+06	1.67293e+06	355023	21.2216
pos	TG(22:0_18:3_18:3)	TG	22:0_18:3_18:3	(22:0_18:3_18:3)	934.799	C61H106O6		43.464	+NH4	0.883572	0.829325	1.53468	0.335514	0.966629	0.947819	0.629857	0.240295	1.094	0.85837	A	-	-	-			727814	64283.6	57153.8	283084	385164	136.06	105821	125785	128582	120062	12412.8	10.3386	257906	810256	486436	518199	277542	53.5588	72615.6	10324.7	75801.2	52913.8	36917.7	69.7694
pos	TG(12:0_14:0_20:4)	TG	12:0_14:0_20:4	(12:0_14:0_20:4)	770.642	C49H86O6		38.226	+H	0.475936	0.0868422	0.551214	0.122676	0.449919	0.089197	0.816233	0.507424	0.945336	0.860424	A	-	-	-			1.57361e+07	2.3593e+07	8.86261e+06	1.60639e+07	7.37067e+06	45.8834	2.14013e+07	1.32668e+07	5.41463e+06	1.33609e+07	7.99374e+06	59.8293	1.42645e+07	6.46858e+06	1.68396e+07	1.25242e+07	5.40008e+06	43.1171	1.78061e+07	1.78127e+07	1.93006e+07	1.83065e+07	860961	4.70304
pos	Cer(d18:1+hO_24:0+O)	Cer	d18:1+hO_24:0+O	(d18:1+hO_24:0+O)	681.627	C42H83O5N1		33.044	+H	0.76588	0.417389	1.04863	0.845561	0.814628	0.548946	0.776846	0.386399	1.06365	0.861298	B	B	B	B			1.56121e+07	469471	522285	5.53464e+06	8.72742e+06	157.687	326189	636310	801716	588072	241406	41.0503	951398	514591	584568	683519	234614	34.3244	421937	444858	918879	595225	280527	47.1297
pos	DGDG(18:2_18:3)	DGDG	18:2_18:3	(18:2_18:3)	938.597	C51H86O15		18.933	+Na	1.03085	0.850196	1.61282	0.184461	0.982258	0.952191	0.609031	0.194899	0.952866	0.865194	A	A	A	A			1.55053e+06	923436	752308	1.07542e+06	420255	39.0781	536629	833922	936090	768880	207522	26.9901	1.12378e+06	1.13311e+06	1.10761e+06	1.1215e+06	12903.3	1.15054	852369	691909	888196	810825	104531	12.8919
pos	TG(16:0_16:1_24:0)	TG	16:0_16:1_24:0	(16:0_16:1_24:0)	916.846	C59H112O6		50.173	+NH4	0.842584	0.612558	0.696117	0.0124076	0.892403	0.339148	1.28197	0.126305	1.05913	0.870662	A	A	B	A			8.40075e+06	1.10365e+08	1.19164e+08	7.93098e+07	6.15664e+07	77.6278	1.14495e+08	1.14751e+08	1.70198e+08	1.33148e+08	3.20865e+07	24.0984	1.556e+08	1.90078e+08	1.94832e+08	1.8017e+08	2.14108e+07	11.8836	1.21828e+08	1.14165e+08	9.37664e+07	1.0992e+08	1.45045e+07	13.1955
pos	PIP(16:0_16:0)	PIP	16:0_16:0	(16:0_16:0)	890.492	C41H80O16N0P2		27.91	+NH4	1.40357	0.380956	2.17118	0.00194491	1.47215	0.0613128	0.678044	0.0220637	1.04887	0.872119	A	-	-	-	Superpathway of bacteriochlorophyll a biosynthesis	Biosynthesis of secondary metabolites;Metabolic pathways;Porphyrin and chlorophyll metabolism	4.78959e+07	5604.81	2.44579e+06	1.67824e+07	2.69727e+07	160.72	13238.7	13216.2	2.98292e+07	9.95188e+06	1.72142e+07	172.975	91144.6	22797	3.57295e+07	1.19478e+07	2.05956e+07	172.379	9209.37	15105.4	1.5625e+06	528937	895094	169.225
pos	MGDG(16:2_16:3)	MGDG	16:2_16:3	(16:2_16:3)	720.481	C41H68O10		15.574	+Na	1.13075	0.35731	1.68558	0.00887553	1.1567	0.36556	0.686235	0.0328169	1.02295	0.873364	B	B	A	B			3.22324e+06	3.68414e+07	2.70631e+07	2.23759e+07	1.72923e+07	77.2807	2.98396e+07	4.05085e+07	1.08009e+07	2.70497e+07	1.5049e+07	55.6347	3.21898e+07	1.63101e+07	1.16573e+07	2.00524e+07	1.07656e+07	53.6876	2.29552e+07	2.63286e+07	2.05368e+07	2.32736e+07	2.909e+06	12.4991
pos	PG(16:1_16:1)	PG	16:1_16:1	(16:1_16:1)	718.479	C38H71O10N0P1		12.925	+Na	1.20503	0.417581	1.51942	0.0805047	1.2944	0.618312	0.851909	0.704356	1.07417	0.87906	-	B	-	-			4.20214e+07	2.59614e+07	4.02521e+07	3.60783e+07	8.80605e+06	24.4081	4.50408e+07	3.61301e+07	5.66197e+07	4.59302e+07	1.02737e+07	22.3681	1.84022e+07	8.15344e+07	4.11509e+07	4.70292e+07	3.19739e+07	67.9874	3.77746e+07	4.87426e+07	3.47163e+07	4.04112e+07	7.37549e+06	18.2511
pos	PG(18:3_18:3)	PG	18:3_18:3	(18:3_18:3)	766.479	C42H71O10N0P1		15.694	+NH4	1.31404	0.207988	1.31214	0.692563	1.3453	0.0406424	1.02527	0.965658	1.02379	0.879243	A	A	A	A			1.64071e+07	2.07357e+06	2.98179e+06	7.15415e+06	8.02613e+06	112.188	1.70881e+06	2.21098e+06	2.2256e+06	2.04846e+06	294236	14.3637	2.84933e+06	3.266e+06	2.44148e+06	2.85227e+06	412268	14.454	2.29081e+06	1.85985e+06	2.6848e+06	2.27848e+06	412615	18.1092
pos	TG(18:0_18:0_18:0)	TG	18:0_18:0_18:0	(18:0_18:0_18:0)	890.83	C57H110O6		50.206	+NH4	1.27169	0.512753	0.750504	0.146055	1.33578	0.2299	1.77985	0.0804271	1.0504	0.880136	A	A	A	A			7.74085e+06	2.22319e+07	3.09437e+07	2.03055e+07	1.17208e+07	57.7222	1.03703e+07	1.56004e+07	1.18079e+07	1.25929e+07	2.70196e+06	21.4562	1.65509e+07	7.24477e+06	1.34043e+07	1.24e+07	4.73363e+06	38.1746	1.86024e+07	3.00696e+07	1.32568e+07	2.06429e+07	8.59011e+06	41.6128
pos	MGDG(18:3_20:3)	MGDG	18:3_20:3	(18:3_20:3)	802.559	C47H78O10		22.257	+Na	1.07512	0.765019	1.93944	0.0575804	1.03679	0.741577	0.534579	0.0565285	0.964342	0.880697	A	A	A	A			1.32873e+06	6.4879e+06	7.75519e+06	5.19061e+06	3.40398e+06	65.5795	8.91082e+06	1.19044e+07	2.70967e+06	7.84162e+06	4.68967e+06	59.8049	5.94319e+06	3.32616e+06	6.68292e+06	5.31742e+06	1.7637e+06	33.1684	6.6669e+06	7.20192e+06	5.64721e+06	6.50534e+06	789846	12.1415
pos	TG(12:0p_11:2_11:2)	TG	12:0p_11:2_11:2	(12:0p_11:2_11:2)	586.46	C37H62O5		18.382	+H	1.32336	0.401619	1.9398	0.152155	1.37522	0.0492977	0.708949	0.312721	1.03918	0.884275	-	-	B	-			1.76089e+08	172590	407287	5.88895e+07	1.01497e+08	172.352	189567	425968	741267	452267	276789	61.2002	275528	258779	317740	284016	30383.2	10.6977	269957	188668	373623	277416	92702.8	33.4165
pos	TG(20:2_18:2_18:2)	TG	20:2_18:2_18:2	(20:2_18:2_18:2)	906.768	C59H102O6		40.844	+NH4	1.08786	0.744736	1.15861	0.258358	1.13902	0.645537	0.983088	0.94462	1.04703	0.885682	A	A	A	A			9.6629e+06	5.93764e+06	9.66825e+06	8.42293e+06	2.15233e+06	25.5532	4.52842e+06	5.68862e+06	7.38235e+06	5.86646e+06	1.43525e+06	24.4653	1.39173e+07	6.83717e+06	7.42501e+06	9.39317e+06	3.92905e+06	41.8288	8.64384e+06	7.07401e+06	9.26924e+06	8.32903e+06	1.13097e+06	13.5786
pos	PG(18:4_18:3)	PG	18:4_18:3	(18:4_18:3)	764.463	C42H69O10N0P1		14.953	+NH4	1.24832	0.115603	1.44307	0.280345	1.22993	0.182926	0.852303	0.564108	0.985272	0.886326	A	A	A	A			710854	3.69957e+07	6.88728e+07	3.55264e+07	3.41047e+07	95.9981	8.97194e+07	6.11034e+07	1.50023e+08	1.00282e+08	4.5391e+07	45.2634	6.08823e+07	1.29654e+08	9.4545e+07	9.50272e+07	3.43885e+07	36.1881	6.61624e+07	8.34857e+07	8.22198e+07	7.72893e+07	9.65692e+06	12.4945
pos	DG(18:1_16:0)	DG	18:1_16:0	(18:1_16:0)	594.522	C37H70O5		31.97	+Na	1.06727	0.845923	1.70499	0.344857	1.14092	0.752713	0.669163	0.46658	1.06901	0.886493	A	A	A	A			4.19221e+06	2.97194e+06	3.20631e+06	3.45682e+06	647558	18.7328	5.71398e+06	2.80873e+06	2.54534e+06	3.68935e+06	1.75832e+06	47.6594	9.87168e+06	3.81094e+06	3.99891e+06	5.89384e+06	3.44619e+06	58.471	6.39976e+06	1.86525e+06	3.56681e+06	3.94394e+06	2.29066e+06	58.0805
pos	PE(18:1_18:2)	PE	18:1_18:2	(18:1_18:2)	741.531	C41H76O8N1P1		27.358	+H	1.47495	0.310251	1.70362	0.176469	1.41841	0.00682743	0.832585	0.498224	0.961668	0.888422	A	A	A	A			8.43865e+07	1.69006e+08	1.38465e+08	1.30619e+08	4.28518e+07	32.8067	1.86738e+08	1.13213e+08	2.90578e+08	1.96843e+08	8.91135e+07	45.2713	2.1628e+08	3.71871e+08	2.31599e+08	2.7325e+08	8.57511e+07	31.3819	1.82933e+08	1.44163e+08	1.44744e+08	1.5728e+08	2.22183e+07	14.1266
pos	TG(18:4_16:0_18:1)	TG	18:4_16:0_18:1	(18:4_16:0_18:1)	852.721	C55H96O6		42.038	+H	0.76624	0.171961	0.599665	0.0425977	0.74112	0.205492	1.23589	0.442418	0.967217	0.888785	A	A	A	A			3.6011e+07	427891	740714	1.23932e+07	2.04542e+07	165.044	708407	390982	656196	585195	170208	29.0856	1.197e+06	1.49328e+06	1.01861e+06	1.23629e+06	239761	19.3935	260490	333562	319800	304617	38829.8	12.7471
pos	TG(18:1_18:2_20:4)	TG	18:1_18:2_20:4	(18:1_18:2_20:4)	904.752	C59H100O6		41.94	+H	1.31309	0.412266	1.53647	0.0894545	1.37122	0.294023	0.892449	0.639197	1.04427	0.892454	A	A	A	A			2.18093e+07	2.15243e+07	2.93332e+07	2.42223e+07	4.42852e+06	18.2828	2.44866e+07	2.98984e+07	4.6867e+07	3.37507e+07	1.16769e+07	34.5976	2.16981e+07	3.01728e+07	3.18023e+07	2.78911e+07	5.42482e+06	19.45	1.99319e+07	1.85147e+07	2.32696e+07	2.0572e+07	2.44125e+06	11.8669
pos	TG(15:0_16:0_20:4)	TG	15:0_16:0_20:4	(15:0_16:0_20:4)	840.721	C54H96O6		42.764	+H	4.49263	0.134427	3.57129	0.0850311	4.25439	0.0471887	1.19127	0.585172	0.946971	0.893849	A	B	-	B			4.23774e+06	92268.3	943586	1.75787e+06	2.18941e+06	124.549	1.13187e+06	220895	286905	546556	507969	92.94	1.57107e+06	1.13228e+06	434060	1.0458e+06	573416	54.8302	320182	212070	86204	206152	117101	56.8034
pos	TG(15:0_16:0_16:0)	TG	15:0_16:0_16:0	(15:0_16:0_16:0)	792.721	C50H96O6		42.325	+NH4	0.793892	0.271844	0.645039	0.0319986	0.823042	0.41495	1.27596	0.422301	1.03672	0.901956	A	A	A	A			7.88806e+06	343654	185017	2.80558e+06	4.40228e+06	156.912	537748	614277	356380	502802	132452	26.3428	1.76288e+06	110656	351122	741551	892627	120.373	399760	714591	976854	697068	288946	41.4516
pos	TG(22:6_12:3_12:3)	TG	22:6_12:3_12:3	(22:6_12:3_12:3)	754.517	C49H70O6		14.724	+Na	1.73613	0.143742	1.8413	0.0389592	1.80992	0.235686	0.982959	0.957145	1.0425	0.907228	A	B	B	B			1.52421e+07	2230.45	3056.22	5.08248e+06	8.79853e+06	173.115	5812.1	3157.09	7393.5	5454.23	2140.76	39.2495	5294.19	9730.72	7277.34	7434.09	2222.41	29.8949	158773	237922	98400	165032	69971.5	42.3988
pos	MGDG(18:0_18:1)	MGDG	18:0_18:1	(18:0_18:1)	784.606	C45H84O10		32.128	+Na	0.808064	0.39579	1.35165	0.024551	0.78094	0.244829	0.577769	0.0325863	0.966434	0.908978	B	-	-	-			7.18019e+06	7.36483e+08	7.46584e+08	4.96749e+08	4.24009e+08	85.3568	7.20346e+08	9.74732e+08	1.04695e+09	9.14009e+08	1.7156e+08	18.77	1.19938e+09	1.12337e+09	1.1599e+09	1.16089e+09	3.80145e+07	3.27461	8.32919e+08	8.24957e+08	9.40467e+08	8.66114e+08	6.45139e+07	7.44865
pos	MG(18:3)	MG	0.752083	(18:3)	352.261	C21H36O4		6.609	+H	1.02157	0.949022	1.32364	0.290252	0.99215	0.976532	0.74956	0.0378783	0.971202	0.909136	C	C	C	-			857036	7.12944e+06	5.59511e+06	4.5272e+06	3.26973e+06	72.2241	7.20223e+06	7.7807e+06	2.27973e+06	5.75422e+06	3.02286e+06	52.533	6.96895e+06	2.79664e+06	4.66193e+06	4.80917e+06	2.09005e+06	43.4596	2.69061e+06	6.80593e+06	5.33058e+06	4.94237e+06	2.08494e+06	42.1851
pos	DGDG(18:1_20:6)	DGDG	18:1_20:6	(18:1_20:6)	962.597	C53H86O15		21.614	+H	1.12531	0.627423	1.70478	0.0947373	1.09587	0.526323	0.642823	0.12091	0.973839	0.910099	A	A	-	-			5.4165e+06	1.78805e+07	1.99488e+07	1.44153e+07	7.86149e+06	54.5358	1.07235e+07	1.88119e+07	2.77854e+07	1.91069e+07	8.53475e+06	44.6683	1.60482e+07	3.78192e+07	3.39213e+07	2.92629e+07	1.16091e+07	39.6716	2.11568e+07	1.78213e+07	2.32953e+07	2.07578e+07	2.75875e+06	13.2902
pos	TG(4:0_14:3_18:2)	TG	4:0_14:3_18:2	(4:0_14:3_18:2)	628.47	C39H64O6		14.887	+Na	2.02036	0.367266	1.17158	0.510065	1.89462	0.232721	1.61715	0.309486	0.937763	0.910219	A	B	B	A			7.58573e+06	2.49617e+06	2.76309e+06	4.28166e+06	2.86452e+06	66.9021	2.76199e+06	1.92182e+06	2.65394e+06	2.44591e+06	457086	18.6877	3.1205e+06	4.95441e+06	5.39561e+06	4.49017e+06	1.20651e+06	26.87	781185	1.26427e+06	925547	990333	247972	25.0393
pos	DG(15:0_16:1)	DG	15:0_16:1	(15:0_16:1)	552.475	C34H64O5		20.672	+NH4	1.11271	0.694339	1.24453	0.239737	1.13832	0.453527	0.914657	0.566105	1.02301	0.926811	B	-	-	-			9.64577e+07	1.57417e+06	2.02127e+06	3.3351e+07	5.46524e+07	163.87	994958	1.43713e+06	2.11643e+06	1.51617e+06	564900	37.2583	2.1586e+06	1.77686e+06	1.95802e+06	1.9645e+06	190951	9.72009	1.44439e+06	1.2852e+06	1.68794e+06	1.47251e+06	202836	13.7749
pos	TG(14:0_10:3_11:3)	TG	14:0_10:3_11:3	(14:0_10:3_11:3)	612.439	C38H60O6		10.788	+H	1.42763	0.173629	1.6969	0.0380777	1.40168	0.170816	0.82602	0.235925	0.981817	0.927572	B	B	-	-			3.26519e+06	6.07472e+06	9.01942e+06	6.11978e+06	2.87738e+06	47.0178	8.24058e+06	9.0201e+06	6.41079e+06	7.89049e+06	1.33942e+06	16.9751	6.46778e+06	5.60259e+06	6.35653e+06	6.1423e+06	470699	7.66323	7.79312e+06	7.52189e+06	4.00423e+06	6.43975e+06	2.11357e+06	32.8208
pos	TG(16:1_16:1_24:0)	TG	16:1_16:1_24:0	(16:1_16:1_24:0)	914.83	C59H110O6		48.802	+NH4	0.769941	0.552661	0.789467	0.579263	0.743001	0.556139	0.941143	0.873459	0.96501	0.928593	A	A	-	B			2.21374e+06	2.46899e+06	3.08311e+06	2.58861e+06	446858	17.2625	2.51419e+06	2.01651e+06	3.98167e+06	2.83745e+06	1.02168e+06	36.0071	2.03395e+06	4.90143e+06	3.64076e+06	3.52538e+06	1.43722e+06	40.7678	3.73411e+06	3.94615e+06	3.42779e+06	3.70268e+06	260603	7.03822
pos	TG(18:4_14:0_16:0)	TG	18:4_14:0_16:0	(18:4_14:0_16:0)	798.674	C51H90O6		40.035	+H	0.566074	0.12702	0.612068	0.0904359	0.540174	0.14836	0.88254	0.781656	0.954247	0.929366	A	A	-	-			3.11999e+07	1.30903e+08	1.02835e+08	8.83126e+07	5.14135e+07	58.2177	7.85731e+07	5.22085e+07	8.14707e+07	7.07508e+07	1.61233e+07	22.7889	9.35497e+07	6.05777e+07	3.12141e+07	6.17805e+07	3.11852e+07	50.4774	8.1615e+07	1.3376e+08	1.51321e+08	1.22232e+08	3.62545e+07	29.6604
pos	TG(16:0_18:1_20:4)	TG	16:0_18:1_20:4	(16:0_18:1_20:4)	880.752	C57H100O6		43.609	+H	0.588469	0.339509	0.399728	0.203751	0.60681	0.358899	1.51806	0.288684	1.03117	0.929374	A	A	A	A			2.23917e+07	1.23609e+09	7.13008e+08	6.57163e+08	6.08774e+08	92.6366	1.28081e+09	1.15388e+09	1.39651e+09	1.27707e+09	1.21358e+08	9.50285	1.87722e+09	1.9101e+09	1.61969e+09	1.80234e+09	1.59027e+08	8.82336	1.30293e+09	1.00538e+09	1.14627e+09	1.15153e+09	1.48845e+08	12.9259
pos	PG(16:0_16:0)	PG	16:0_16:0	(16:0_16:0)	722.51	C38H75O10N0P1		24.822	+NH4	1.39569	0.319855	0.957348	0.868007	1.36813	0.0480971	1.42908	0.188789	0.980251	0.935977	A	-	A	-			653940	5.70608e+06	8.23651e+06	4.86551e+06	3.86054e+06	79.345	7.75797e+06	7.01952e+06	1.12556e+07	8.67769e+06	2.26284e+06	26.0765	1.14891e+07	1.05285e+07	8.74589e+06	1.02545e+07	1.392e+06	13.5745	7.50008e+06	6.15132e+06	8.93628e+06	7.52922e+06	1.39271e+06	18.4974
pos	Cer(d18:1+hO_25:0+O)	Cer	d18:1+hO_25:0+O	(d18:1+hO_25:0+O)	695.643	C43H85O5N1		34.074	+H	0.975283	0.921342	1.12939	0.639612	0.955087	0.864209	0.845668	0.538638	0.979293	0.93681	B	B	B	B			310427	2.24879e+06	2.32814e+06	1.62912e+06	1.14271e+06	70.1428	1.88898e+06	1.9047e+06	1.95085e+06	1.91484e+06	32158.7	1.67944	2.93735e+06	4.15343e+06	2.87112e+06	3.32063e+06	721980	21.7422	2.0198e+06	1.87115e+06	1.8602e+06	1.91705e+06	89152.6	4.65051
pos	TG(15:0_16:0_18:3)	TG	15:0_16:0_18:3	(15:0_16:0_18:3)	814.705	C52H94O6		42.33	+H	0.871227	0.512421	0.633786	0.0291538	0.855805	0.20501	1.35031	0.111987	0.982299	0.937623	A	A	A	A			6.39443e+06	343654	185017	2.3077e+06	3.5401e+06	153.404	537748	614277	356380	502802	132452	26.3428	1.76288e+06	110656	351122	741551	892627	120.373	399760	714591	976854	697068	288946	41.4516
pos	TG(18:3_18:2_18:3)	TG	18:3_18:2_18:3	(18:3_18:2_18:3)	874.705	C57H94O6		36.635	+NH4	1.20384	0.540566	1.23134	0.0936676	1.22591	0.0479134	0.995595	0.957016	1.01833	0.944642	A	A	A	A			2.65724e+06	1.40386e+06	1.5881e+06	1.88307e+06	676755	35.939	2.21611e+06	1.11883e+06	1.82771e+06	1.72088e+06	556385	32.3314	2.06993e+06	2.12705e+06	2.17685e+06	2.12461e+06	53500.9	2.51815	971810	861031	1.26133e+06	1.03139e+06	206691	20.0401
pos	MGDG(16:1_18:3)	MGDG	16:1_18:3	16:1_18:3	750.528	C43H74O10		20.534	+Na	1.04969	0.648692	1.55952	0.00531054	1.05674	0.623	0.677603	0.00708551	1.00671	0.947111	A	A	A	A			1.76201e+09	623318	1.14828e+06	5.87928e+08	1.01679e+09	172.944	681846	861854	1.23207e+06	925255	280535	30.3198	1.63986e+06	1.14283e+06	1.26313e+06	1.34861e+06	259307	19.2277	638418	678921	2.09465e+06	1.13733e+06	829310	72.9173
pos	TG(22:6_11:2_11:2)	TG	22:6_11:2_11:2	(22:6_11:2_11:2)	730.517	C47H70O6		16.198	+Na	0.847161	0.499198	1.21723	0.61829	0.863636	0.49534	0.709512	0.448997	1.01945	0.948519	A	A	B	A			1.49816e+08	2230.45	3056.22	4.99404e+07	8.64947e+07	173.196	5812.1	3157.09	7393.5	5454.23	2140.76	39.2495	5294.19	9730.72	7277.34	7434.09	2222.41	29.8949	158773	237922	98400	165032	69971.5	42.3988
pos	TG(18:3_10:2_10:4)	TG	18:3_10:2_10:4	(18:3_10:2_10:4)	648.439	C41H60O6		13.754	+H	1.52857	0.440366	1.28487	0.360358	1.57038	0.180626	1.22221	0.385441	1.02735	0.948648	A	A	-	A			274970	1.14059e+07	2.07413e+07	1.08074e+07	1.02463e+07	94.8081	2.71108e+07	1.87079e+07	4.43193e+07	3.0046e+07	1.30556e+07	43.452	1.20654e+07	4.03197e+07	2.61204e+07	2.61685e+07	1.41272e+07	53.9855	1.32813e+07	1.61197e+07	1.17529e+07	1.3718e+07	2.21592e+06	16.1534
pos	TG(18:2_10:2_10:4)	TG	18:2_10:2_10:4	(18:2_10:2_10:4)	650.455	C41H62O6		15.087	+H	2.01271	0.379046	1.14856	0.528405	1.93946	0.24606	1.68861	0.307985	0.963608	0.949556	B	-	-	A			236484	8.432e+06	1.06704e+07	6.44628e+06	5.49307e+06	85.2129	6.7449e+06	7.62383e+06	7.9845e+06	7.45107e+06	637600	8.55716	1.01082e+07	7.28837e+06	8.84532e+06	8.74731e+06	1.41248e+06	16.1476	7.03544e+06	5.09424e+06	6.62096e+06	6.25021e+06	1.02233e+06	16.3567
pos	TG(22:5_10:4_14:3)	TG	22:5_10:4_14:3	(22:5_10:4_14:3)	754.517	C49H70O6		17.661	+Na	0.238794	0.407673	0.613427	0.688731	0.245253	0.410513	0.399808	0.542065	1.02705	0.964192	B	B	B	B			1.91865e+08	5.17697e+06	2.88903e+07	7.53108e+07	1.01633e+08	134.951	2.46129e+07	1.008e+07	1.64247e+07	1.70392e+07	7.28592e+06	42.7597	1.73056e+07	3.94098e+07	2.75953e+07	2.81036e+07	1.10609e+07	39.3576	2.51902e+07	3.03856e+07	3.38822e+07	2.98193e+07	4.37354e+06	14.6668
pos	PA(18:1_18:2)	PA	18:1_18:2	(18:1_18:2)	698.489	C39H71O8N0P1		14.531	+NH4	1.66063	0.167119	1.8664	0.427531	1.71169	0.566745	0.917104	0.915318	1.03075	0.966392	A	A	-	A	Archaetidylinositol biosynthesis;Other	Other	1.8872e+06	5.84188e+07	5.79188e+07	3.94083e+07	3.24952e+07	82.4577	6.40317e+07	3.81365e+07	5.74519e+07	5.32067e+07	1.34595e+07	25.2965	6.46975e+07	7.88121e+07	6.97994e+07	7.1103e+07	7.14701e+06	10.0516	7.02163e+07	4.61622e+07	5.86765e+07	5.83517e+07	1.20304e+07	20.617
pos	PE(18:3_18:3)	PE	18:3_18:3	(18:3_18:3)	735.484	C41H70O8N1P1		18.639	+H	1.18215	0.479206	0.987193	0.9707	1.19039	0.36156	1.20583	0.544913	1.00697	0.966491	A	A	A	A			2.28161e+06	3.43279e+06	5.58631e+06	3.7669e+06	1.67749e+06	44.5323	2.97048e+06	9.76337e+06	1.58008e+07	9.51155e+06	6.41887e+06	67.485	5.84783e+06	5.11838e+06	7.65044e+06	6.20555e+06	1.30338e+06	21.0035	6.8336e+06	3.48721e+06	9.22436e+06	6.51505e+06	2.88181e+06	44.2331
neg	DGMG(18:1)	DGMG	18:01:00	(18:1)	680.398	C33H60O14		14.254	-H	1.64401	0.299135	1.52377	0.319248	1.6632	0.131087	1.0915	0.750864	1.01167	0.970779	B	B	-	-			6.20318e+06	6.65371e+06	1.26389e+07	8.49859e+06	3.59266e+06	42.2736	1.1296e+07	8.97895e+06	4.23618e+06	8.17037e+06	3.59868e+06	44.0456	3.95891e+06	3.22843e+06	4.25828e+06	3.81521e+06	529750	13.8852	8.33194e+06	1.18741e+07	6.89319e+06	9.03309e+06	2.56343e+06	28.3782
pos	PE(22:0_18:3)	PE	22:0_18:3	(22:0_18:3)	797.593	C45H84O8N1P1		34.046	+H	0.86372	0.0494211	1.49782	0.113634	0.864716	0.0360308	0.577315	0.0758774	1.00115	0.970808	A	A	A	A			2.07399e+06	1.15793e+08	1.776e+08	9.84891e+07	8.90334e+07	90.3993	1.54301e+08	7.80953e+07	8.62715e+07	1.06223e+08	4.18374e+07	39.3865	2.65026e+08	2.80988e+08	2.49908e+08	2.65307e+08	1.55416e+07	5.85795	5.79462e+07	1.74513e+08	1.94492e+08	1.42317e+08	7.37471e+07	51.8189
pos	TG(25:0_14:0_16:1)	TG	25:0_14:0_16:1	(25:0_14:0_16:1)	902.83	C58H110O6		49.333	+NH4	0.576957	0.148063	0.565237	0.00503707	0.584427	0.0211489	1.03395	0.841154	1.01295	0.973578	A	-	-	-			6.23994e+06	1.33579e+06	1.5707e+06	3.04881e+06	2.76609e+06	90.7268	1.51945e+06	1.74192e+06	1.93685e+06	1.73274e+06	208854	12.0534	1.6961e+06	2.32709e+06	2.04565e+06	2.02295e+06	316107	15.6261	1.1669e+06	1.0553e+06	1.41023e+06	1.21081e+06	181491	14.9892
pos	TG(16:0_18:3_18:3)	TG	16:0_18:3_18:3	(16:0_18:3_18:3)	850.705	C55H94O6		37.563	+Na	1.19038	0.570032	1.38359	0.296122	1.20486	0.596375	0.870824	0.697927	1.01216	0.974934	A	A	A	A			490303	1.1437e+06	1.4974e+06	1.0438e+06	510927	48.9486	1.14368e+06	2.25986e+06	2.73053e+06	2.04469e+06	815018	39.8602	5.79024e+06	1.58158e+06	2.309e+06	3.22694e+06	2.24948e+06	69.7094	907526	780449	2.17404e+06	1.28734e+06	770531	59.8545
pos	TG(16:0_16:1_18:3)	TG	16:0_16:1_18:3	(16:0_16:1_18:3)	826.705	C53H94O6		42.024	+H	0.692906	0.256809	0.551007	0.0536882	0.698871	0.182768	1.26835	0.403329	1.00861	0.980709	A	A	A	A			3.93956e+07	2.81435e+07	4.04155e+07	3.59849e+07	6.80993e+06	18.9244	1.67393e+07	1.97791e+07	2.2626e+07	1.97148e+07	2.94386e+06	14.9322	2.10135e+07	2.12336e+07	1.40984e+07	1.87818e+07	4.05743e+06	21.603	3.09128e+07	3.35379e+07	1.55121e+07	2.66543e+07	9.73821e+06	36.5353
pos	TG(16:0_14:0_16:0)	TG	16:0_14:0_16:0	(16:0_14:0_16:0)	778.705	C49H94O6		41.384	+NH4	0.780169	0.393998	1.10658	0.830857	0.773898	0.300851	0.699358	0.53665	0.991963	0.982088	A	A	A	A			7.63763e+06	1.54772e+06	2.85824e+06	4.01453e+06	3.20538e+06	79.8446	3.57799e+06	2.3786e+06	1.21371e+07	6.03124e+06	5.32174e+06	88.2363	830671	1.69101e+06	2.39919e+06	1.64029e+06	785491	47.8873	1.57281e+06	2.19382e+06	3.37693e+06	2.38118e+06	916537	38.4908
pos	PC(37:5)	PC	1.54514	(37:5)	793.562	C45H80O8N1P1		17.879	+H	1.38223	0.238207	2.04647	0.00201396	1.37675	0.0700631	0.672743	0.00971768	0.996033	0.984362	C	C	-	-			1.22876e+07	3.43455e+07	2.59044e+07	2.41792e+07	1.11297e+07	46.03	2.5849e+07	3.5377e+07	8.67569e+06	2.33005e+07	1.35318e+07	58.0751	3.08892e+07	1.46656e+07	2.21108e+07	2.25552e+07	8.12092e+06	36.0046	2.10942e+07	1.22791e+07	1.91748e+07	1.7516e+07	4.63575e+06	26.4658
pos	TG(6:0_10:3_18:4)	TG	6:0_10:3_18:4	(6:0_10:3_18:4)	596.408	C37H56O6		6.359	+H	1.94394	0.294818	1.7618	0.0800049	1.92295	0.459563	1.09147	0.890191	0.989204	0.987187	-	-	-	B			5.15607e+06	664867	591345	2.13743e+06	2.61448e+06	122.319	1.71117e+06	1.19253e+06	1.18691e+06	1.36354e+06	301076	22.0805	191360	2.62056e+06	4.13099e+06	2.3143e+06	1.98759e+06	85.8829	125643	16631.9	24184.1	55486.3	60874.6	109.711
pos	PC(18:3_21:1)	PC	18:3_21:1	(18:3_21:1)	823.609	C47H86O8N1P1		30.62	+H	1.15037	0.390553	1.86365	0.0468281	1.15277	0.301028	0.618556	0.0573257	1.00209	0.989698	-	A	B	-			435772	405129	454534	431811	24939.7	5.7756	264397	341528	393474	333133	64946.8	19.4958	522146	337359	299542	386349	119114	30.8307	403699	274216	428744	368886	82937.8	22.4833
pos	PI(18:0_18:3)	PI	18:0_18:3	(18:0_18:3)	860.542	C45H81O13N0P1		20.915	+NH4	1.04792	0.871525	1.12657	0.692442	1.04429	0.00758682	0.926964	0.794375	0.996536	0.990188	A	A	A	A			2.53451e+06	5.69148e+06	5.80249e+06	4.67616e+06	1.85556e+06	39.6812	6.58343e+06	2.56005e+06	4.93833e+06	4.69393e+06	2.02279e+06	43.0937	7.416e+06	7.82785e+06	4.3311e+06	6.52498e+06	1.91108e+06	29.2887	2.95049e+06	4.42435e+06	3.43527e+06	3.60337e+06	751172	20.8464
pos	Cer(d18:1+hO_16:0+O)	Cer	d18:1+hO_16:0+O	(d18:1+hO_16:0+O)	569.502	C34H67O5N1		20.327	+H	0.897577	0.646846	1.25052	0.295605	0.900446	0.646183	0.72006	0.211685	1.0032	0.990898	B	B	B	B			3.15185e+06	497093	524542	1.39116e+06	1.52486e+06	109.611	545561	451370	679622	558851	114705	20.5251	752184	1.09871e+06	865212	905367	176716	19.5188	651713	467805	560542	560020	91955.1	16.42
pos	PIP(16:0_18:3)	PIP	16:0_18:3	(16:0_18:3)	912.476	C43H78O16N0P2		28.354	+NH4	1.42562	0.265312	2.07324	0.00135488	1.42812	0.0827104	0.688835	0.0338169	1.00175	0.994209	-	-	-	A		Other	1.19912e+07	7.23983e+07	8.37759e+07	5.60551e+07	3.85822e+07	68.829	1.06382e+08	1.07191e+08	1.65161e+08	1.26245e+08	3.37052e+07	26.6984	7.72367e+07	1.56027e+08	1.54251e+08	1.29171e+08	4.49856e+07	34.8263	1.0352e+08	1.0303e+08	1.16376e+08	1.07642e+08	7.56786e+06	7.03057
pos	TG(18:3_18:2_20:5)	TG	18:3_18:2_20:5	(18:3_18:2_20:5)	898.705	C59H94O6		37.717	+H	0.821745	0.581004	1.12421	0.449441	0.820251	0.484136	0.729624	0.246599	0.998182	0.996509	-	A	A	A			5.39032e+06	1.12892e+06	1.42985e+06	2.6497e+06	2.37821e+06	89.7542	1.89834e+06	1.24285e+06	2.64682e+06	1.92934e+06	702498	36.4114	885662	1.84983e+06	1.60573e+06	1.44707e+06	501281	34.641	905257	1.02517e+06	1.05817e+06	996199	80467.5	8.07745
pos	DG(16:1_18:1)	DG	16:1_18:1	(16:1_18:1)	592.507	C37H68O5		27.188	+H	1.17386	0.434697	1.52961	0.0493693	1.17473	0.440877	0.767994	0.111417	1.00074	0.996653	A	B	A	B			3.31849e+07	7.45827e+07	6.98176e+07	5.91951e+07	2.26511e+07	38.2652	8.69363e+07	8.4152e+07	1.6636e+08	1.12483e+08	4.66801e+07	41.4997	7.71302e+07	1.58386e+08	1.54251e+08	1.29922e+08	4.5766e+07	35.2257	1.0437e+08	1.0303e+08	1.17114e+08	1.08171e+08	7.77317e+06	7.18598
pos	TG(15:0_14:1_16:1)	TG	15:0_14:1_16:1	(15:0_14:1_16:1)	760.658	C48H88O6		37.616	+NH4	0.701043	0.421983	0.600037	0.260961	0.701449	0.302065	1.16901	0.703764	1.00058	0.99893	A	-	-	-			7.39447e+06	8.26053e+06	4.94759e+06	6.86753e+06	1.71818e+06	25.0189	1.02229e+07	8.29995e+06	5.67472e+06	8.06585e+06	2.28309e+06	28.3057	7.00062e+06	4.46958e+06	4.45618e+06	5.30879e+06	1.46518e+06	27.5991	5.69599e+06	7.32697e+06	6.65109e+06	6.55802e+06	819463	12.4956
pos	TG(14:0p_11:2_11:2)	TG	14:0p_11:2_11:2	(14:0p_11:2_11:2)	614.491	C39H66O5		21.015	+H	1.53492	0.240037	2.19725	0.00201991	1.53455	0.0502331	0.698395	0.0293257	0.999753	0.999234	B	-	-	-			7.524e+07	1.10001e+07	1.67005e+07	3.43135e+07	3.55578e+07	103.626	7.95981e+06	1.45448e+07	1.57272e+07	1.27439e+07	4.18515e+06	32.8403	2.52666e+07	1.64713e+07	1.1976e+07	1.79046e+07	6.76024e+06	37.7569	1.61613e+07	1.198e+07	2.00616e+07	1.60676e+07	4.04164e+06	25.1539
pos	TG(18:0_8:0_10:0)	TG	18:0_8:0_10:0	(18:0_8:0_10:0)	638.548	C39H74O6		32.573	+H	0	0.42265	1.17114	0.916989	0	0.42265	0	0.42265	#DIV_0!	#DIV_0!	B	-	-	-			0	614317	3.40537e+06	1.33989e+06	1.81493e+06	135.453	1.27938e+06	875044	390662	848363	444960	52.4493	2.40788e+06	2.09753e+06	2.63057e+06	2.37866e+06	267718	11.255	423836	389118	389719	400891	19873.1	4.95724
pos	TG(16:1_10:0_18:3)	TG	16:1_10:0_18:3	(16:1_10:0_18:3)	742.611	C47H82O6		18.741	+H	0	0.33469	0	0.33469	0	0.33469	#DIV_0!	#DIV_0!	#DIV_0!	#DIV_0!	B	-	-	-			36587.2	8.52197e+06	4.81315e+06	4.45723e+06	4.25387e+06	95.4375	3.97854e+07	6.20899e+06	1.06013e+07	1.88652e+07	1.825e+07	96.739	5.33882e+06	1.17967e+06	2.43859e+06	2.98569e+06	2.13287e+06	71.4363	6.01543e+06	1.03233e+06	5.57976e+06	4.20917e+06	2.75983e+06	65.5671
																																			#DIV/0!	#DIV/0!	#DIV/0!
